# Supplementary material for: Isolation of cytotoxic daphnane-type and tigliane-type diterpenoids from Daphne genkwa using MetGem software
Source: Royal Society of Chemistry journal article supplement (doi:10.1039/d2nj05276h), 2022-12-08
Supplement: d2nj05276h1.pdf [file d2nj05276h1.pdf]

## Supporting information

### Isolation of cytotoxic daphnane-type and tigliane-type diterpenoids from *Daphne genkwa* using MetGem software

Si-Hui Mi<sup>a, 1</sup>, Zhi-Kang Duan<sup>a, 1</sup>, Yu-Jue Wang<sup>a</sup>, Shu-Hui Dong<sup>a</sup>, Peng Zhao<sup>a</sup>, Guo-Dong Yao<sup>a</sup>, Qing-Bo Liu<sup>a</sup>, Bin Lin<sup>b</sup>, Shao-Jiang Song<sup>a</sup>, Xiao-Xiao Huang<sup>a, \*</sup>

*<sup>a</sup>Key Laboratory of Computational Chemistry-Based Natural Antitumor Drug Research & Development, Liaoning Province; Engineering Research Center of Natural Medicine Active Molecule Research & Development, Liaoning Province; Key Laboratory of Natural Bioactive Compounds Discovery & Modification, Shenyang; School of Traditional Chinese Materia Medica, Shenyang Pharmaceutical University, Shenyang, Liaoning, 110016, China*

*<sup>b</sup>School of Pharmaceutical Engineering, Shenyang Pharmaceutical University, Shenyang, Liaoning, 110016, China*

<sup>1</sup> These authors contributed equally to this work.

\*Corresponding authors.

xiaoxiao270@163.com (X. X. Huang)

## List of supplementary content

### General experimental procedures

### Extraction and isolation

### MZmine 2 data preprocessing parameters for global network

### Molecular network analysis

**Figure S1.** UV spectrum of compound **1**

**Figure S2** IR spectrum of compound **1**

**Figure S3.** HRESIMS spectrum of compound **1**

**Figure S4.**  $^1\text{H}$  NMR spectrum (600 MHz,  $\text{CDCl}_3$ ) of compound **1**

**Figure S5.**  $^{13}\text{C}$  NMR spectrum (150 MHz,  $\text{CDCl}_3$ ) of compound **1**

**Figure S6.** HSQC spectrum (600 MHz,  $\text{CDCl}_3$ ) of compound **1**

**Figure S7.** HMBC spectrum (600 MHz,  $\text{CDCl}_3$ ) of compound **1**

**Figure S8.**  $^1\text{H}$ - $^1\text{H}$  COSY spectrum (600 MHz,  $\text{CDCl}_3$ ) of compound **1**

**Figure S9.** NOESY spectrum (600 MHz,  $\text{CDCl}_3$ ) of compound **1**

**Figure S10.** UV spectrum of compound **3**

**Figure S11** IR spectrum of compound **3**

**Figure S12.** HRESIMS spectrum of compound **3**

**Figure S13.**  $^1\text{H}$  NMR spectrum (600 MHz,  $\text{CDCl}_3$ ) of compound **3**

**Figure S14.**  $^{13}\text{C}$  NMR spectrum (150 MHz,  $\text{CDCl}_3$ ) of compound **3**

**Figure S15.** HSQC spectrum (600 MHz,  $\text{CDCl}_3$ ) of compound **3**

**Figure S16.** HMBC spectrum (600 MHz,  $\text{CDCl}_3$ ) of compound **3**

**Figure S17.**  $^1\text{H}$ - $^1\text{H}$  COSY spectrum (600 MHz,  $\text{CDCl}_3$ ) of compound **3**

**Figure S18.** NOESY spectrum (600 MHz,  $\text{CDCl}_3$ ) of compound **3**

**Figure S19.** UV spectrum of compound **4**

**Figure S20** IR spectrum of compound **4**

**Figure S21.** HRESIMS spectrum of compound **4**

**Figure S22.**  $^1\text{H}$  NMR spectrum (600 MHz,  $\text{CDCl}_3$ ) of compound **4**

**Figure S23.**  $^{13}\text{C}$  NMR spectrum (150 MHz,  $\text{CDCl}_3$ ) of compound **4**

**Figure S24.** HSQC spectrum (600 MHz,  $\text{CDCl}_3$ ) of compound **4**

**Figure S25.** HMBC spectrum (600 MHz, CDCl<sub>3</sub>) of compound **4**

**Figure S26.** <sup>1</sup>H-<sup>1</sup>H COSY spectrum (600 MHz, CDCl<sub>3</sub>) of compound **4**

**Figure S27.** NOESY spectrum (600 MHz, CDCl<sub>3</sub>) of compound **4**

**Figure S28.** UV spectrum of compound **6**

**Figure S29** IR spectrum of compound **1**

**Figure S30.** HRESIMS spectrum of compound **6**

**Figure S31.** <sup>1</sup>H NMR spectrum (600 MHz, CDCl<sub>3</sub>) of compound **6**

**Figure S32.** <sup>13</sup>C NMR spectrum (150 MHz, CDCl<sub>3</sub>) of compound **6**

**Figure S33.** HSQC spectrum (600 MHz, CDCl<sub>3</sub>) of compound **6**

**Figure S34.** HMBC spectrum (600 MHz, CDCl<sub>3</sub>) of compound **6**

**Figure S35.** <sup>1</sup>H-<sup>1</sup>H COSY spectrum (600 MHz, CDCl<sub>3</sub>) of compound **6**

**Figure S36.** NOESY spectrum (600 MHz, CDCl<sub>3</sub>) of compound **6**

**TableS1** The analysis result of MetGem software

## General experimental procedures

Optical rotation was tested on a JASCO DIP-370 digital polarimeter (JASCO, Tokyo, Japan). ECD spectra were measured by a MOS-450 spectrometer (Bio-Logic Science, France). UV spectra were recorded in MeOH using a Shimadzu UV-2600i spectrophotometer (Shimadzu, Tokyo, Japan). The 1D and 2D NMR spectra were recorded on a Bruker AVIII-600 spectrometer (600 and 150 MHz) in CDCl<sub>3</sub> with TMS as an internal standard. HRESIMS data were tested in the positive-ion mode on a Bruker Micro Q-TOF. Chromatographic silica gel (200–300 mesh, Qingdao Marine Chemical Factory, Qingdao, China), Thin-Layer Chromatography (TLC) was carried out on silica gel GF254 (Qingdao Marine Chemical, Inc.), and the vanillin-H<sub>2</sub>SO<sub>4</sub> as the developer reagent. Semi-preparative HPLC was performed on a Shimadzu LC-20A with an SPD-20A UV/VIS'S detector and using the column of YMC Pack ODS-A (250 × 10 mm, 5 μm, YMC Company, Kyoto, Japan). Reversed-phase C18 (RP-C<sub>18</sub>) silica gel (50 μm, Japan) was employed for column chromatography. Reagents and solvents were obtained from commercial supplies. The MTT assays were measured on a Varioskan Flash Multimode Reader (Thermo Scientific Co. Ltd, Massachusetts, USA).

## Extraction and isolation

The dried flower buds of *D. genkwa* (60.0 kg) were extracted with 70% EtOH three times. After removal of the solvent under vacuum, the residue was suspended in H<sub>2</sub>O and successively extracted with CH<sub>2</sub>Cl<sub>2</sub>. Subsequently, the CH<sub>2</sub>Cl<sub>2</sub> extract was subjected to column chromatography (200–300 mesh) under reduced pressure and subsequent TLC analysis. Then, the CH<sub>2</sub>Cl<sub>2</sub> extract was successfully divided into six fractions (Fr. A–Fr. E) by cross-merging. Fr. C (230.0 g) was further subjected to HP-20 and ODS using a mixture of EtOH–H<sub>2</sub>O (from 30:70 to 100:0, v/v) to afford four fractions (Fr. C1–C4). Fr. C3 (25.1 g) was separated on a silica gel column eluted with PE-EA and a semi-preparative HPLC to get compound **5** (30.1 mg). Fr. C2 (22.3 g) was purified by a silica gel column and RP-HPLC to obtain compound **2** (4.0 mg) and **3** (10.0 mg). Fr. D (400.0 g) was also further subjected on HP-20 and ODS using a mixture of EtOH–H<sub>2</sub>O (from 30:70 to 100:0, v/v) to afford four fractions (Fr. D1–D3).

Through a silica gel column and RP-HPLC, compound **1** (7.5 mg) was obtained from Fr. D1 (15.3 g), compounds **7** (200.3 mg) and **8** (9.2 mg) from Fr. D2, and compounds **4** (10.5 mg) and **6** (9.3 mg) from Fr. D3.

### **MZmine 2 data preprocessing parameters for global network**

Raw files were converted into mzXML (mass spectrometry data format) files using the GNPS\_Vendor\_Conversion software. Then, mzXML files were processed using MZmine 2.38 (Olivon, et al. 2017, Brel, et al. 2020). Mass detection was carried out with a centroid mass detector with the noise level set to 1000 for the MS1 level and 100 for the MS2 level set to all. The ADAP (Automated Data Analysis Pipeline) chromatogram builder was achieved using a minimum group size of scans of 4, a minimum group intensity threshold of 3000, a minimum highest intensity of 3000, and an m/z tolerance of 0.002 or 10.0 ppm. The wavelets (ADAP) algorithm was used for the chromatogram deconvolution with the following settings: S/N threshold of 5, an intensity window SN, a minimum feature height of 300, a coefficient area threshold of 20, a peak duration range between 0 and 1, and an RT wavelet range between 0 and 0.02. Chromatograms were deisotoped using the isotopic peaks grouper algorithm with an m/z tolerance of 0.002 (10 ppm), RT tolerance of 0.2 (absolute), maximum charge of 3, and the representative isotope used was the most intense. Peak alignment was performed using the join aligner method: m/z tolerance of 0.003 or 10 ppm, weight for m/z of 1.00, RT tolerance of 2 min, weight for RT of 1.00. The peak list was gap filled with the peak finder method multithreaded with an intensity tolerance of 30.00, m/z tolerance of 0.02 (10 ppm), and 0.20 for RT tolerance.

### **Molecular network analysis**

After preprocessing the HPLC-HRMS/MS data with MZmine 2.38, the output .mgf file was processed with the MetGem software version 1.3.6 to give a network containing nodes distributed in clusters (Olivon, et al. 2018, Olivon, et al. 2017). Networks were generated using the following parameters: m/z tolerance set to 0.01, minimum matched peaks set to 4, topK set to 10, minimal cosine score value of 0.60,

and max. connected component size of 400. Then, the associated CSV file was loaded. For the mapping process, the relative quantification of each ion was represented by pie chart diagrams for which the proportions were based on the respective areas of the corresponding extracted ion chromatograph areas. Then, the analogues of the spectra in the network were searched in the available spectral libraries. The library spectra were filtered in the same manner as the input data. All the matches between the network spectra and library spectra were required to have a score above 0.6 and at least 4 matched peaks. The  $m/z$  tolerance for the analogue search was set to 100. T-SNE visualization was generated using the following parameters: at least 1 cosine score above 0.60; number of iterations, 1000; perplexity, 6; learning rate, 200; early exaggeration, 12; using Barnes-hut approximation with an angle of 0.5.

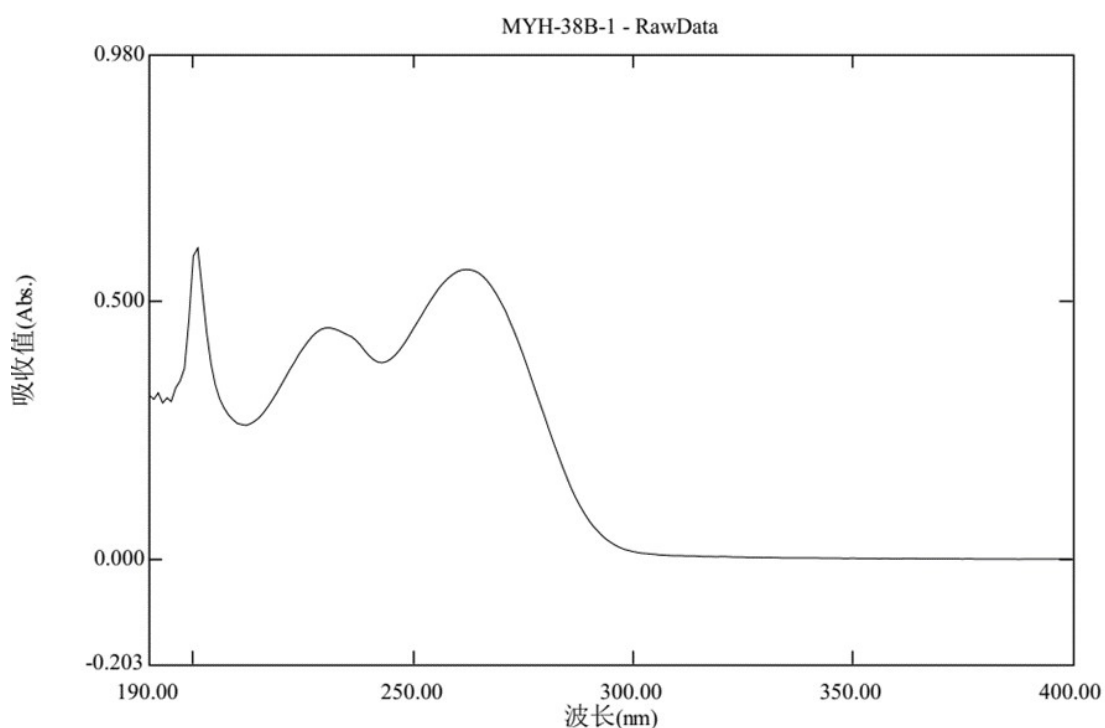

**Figure S1.** UV spectrum of compound 1

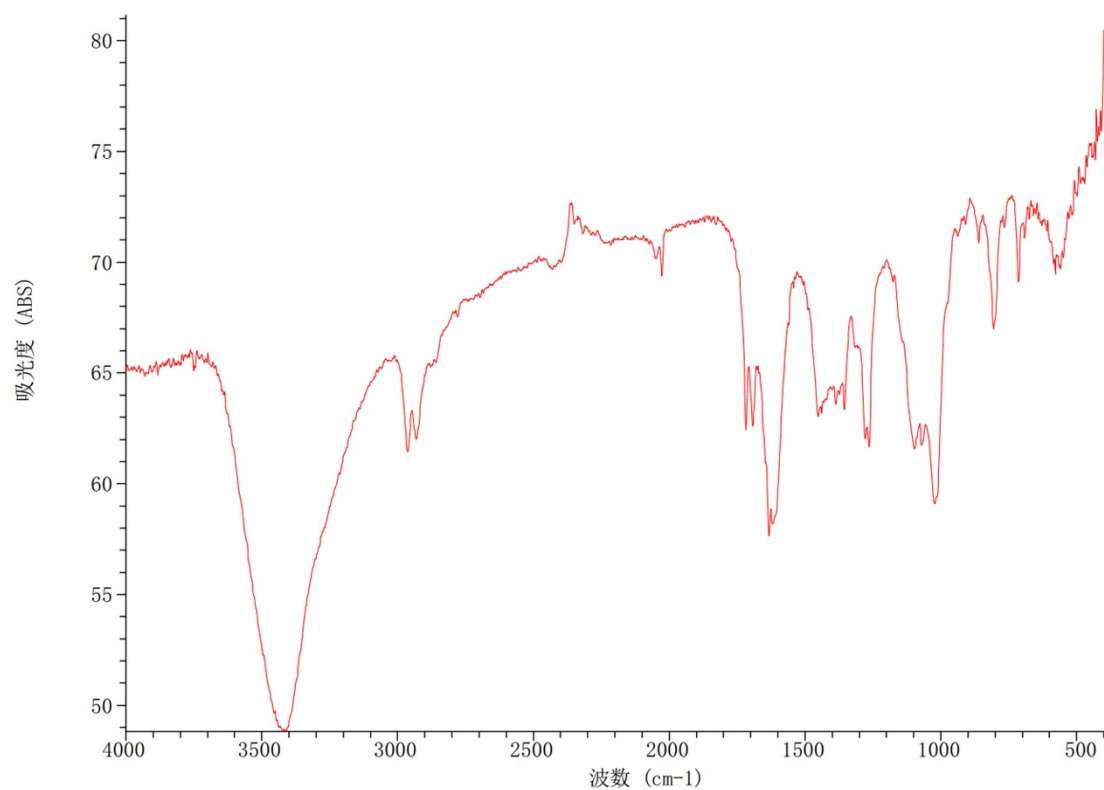

**Figure S2** IR spectrum of compound **1**

**+MS, 0.3min #30**

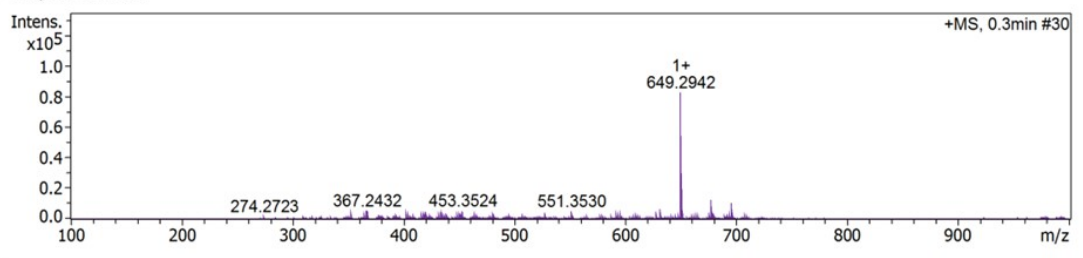

**C35H46O10, M+nNa, 649.2983**

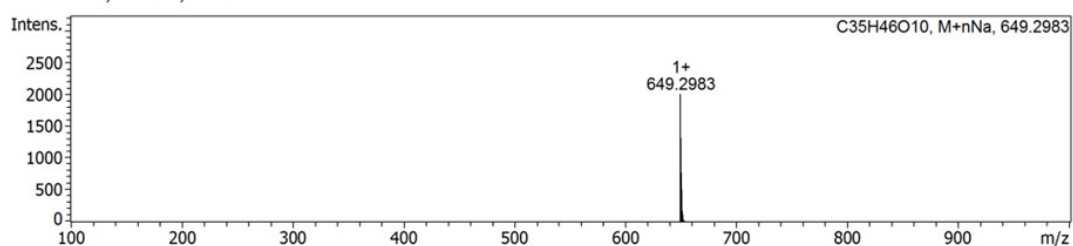

**Figure S3.** HRESIMS spectrum of compound **1**

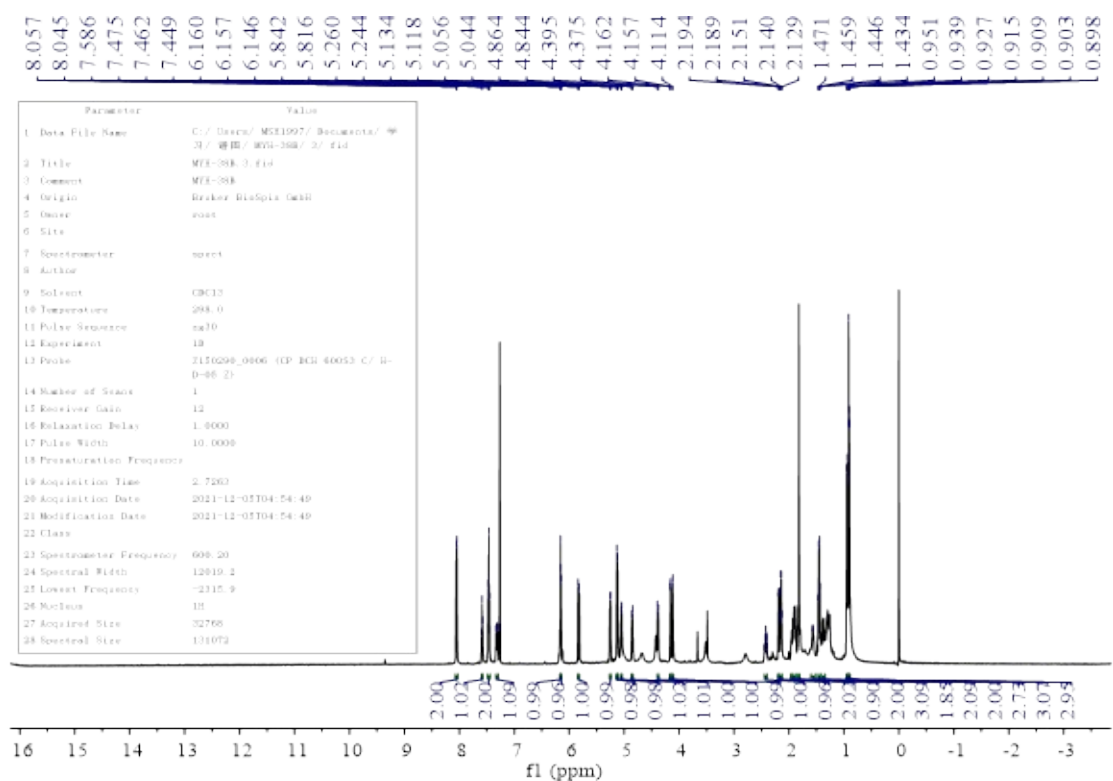

Figure S4. <sup>1</sup>H NMR spectrum (600 MHz, CDCl<sub>3</sub>) of compound 1

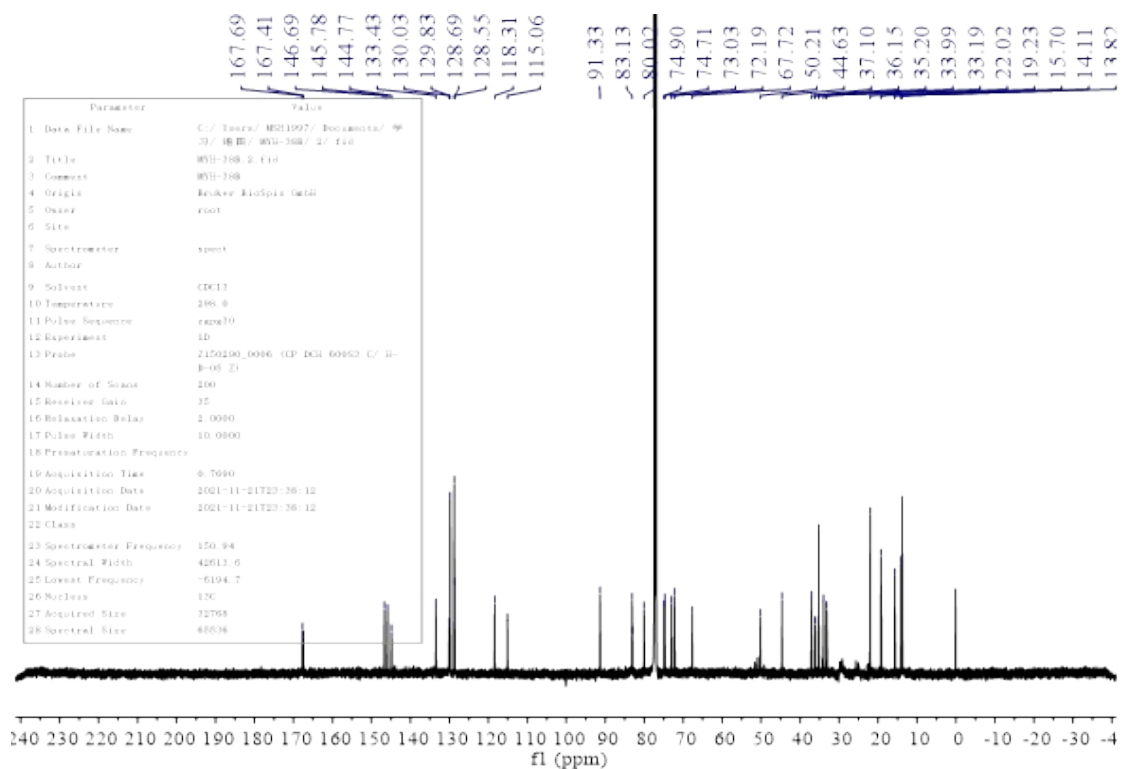

Figure S5. <sup>13</sup>C NMR spectrum (150 MHz, CDCl<sub>3</sub>) of compound 1



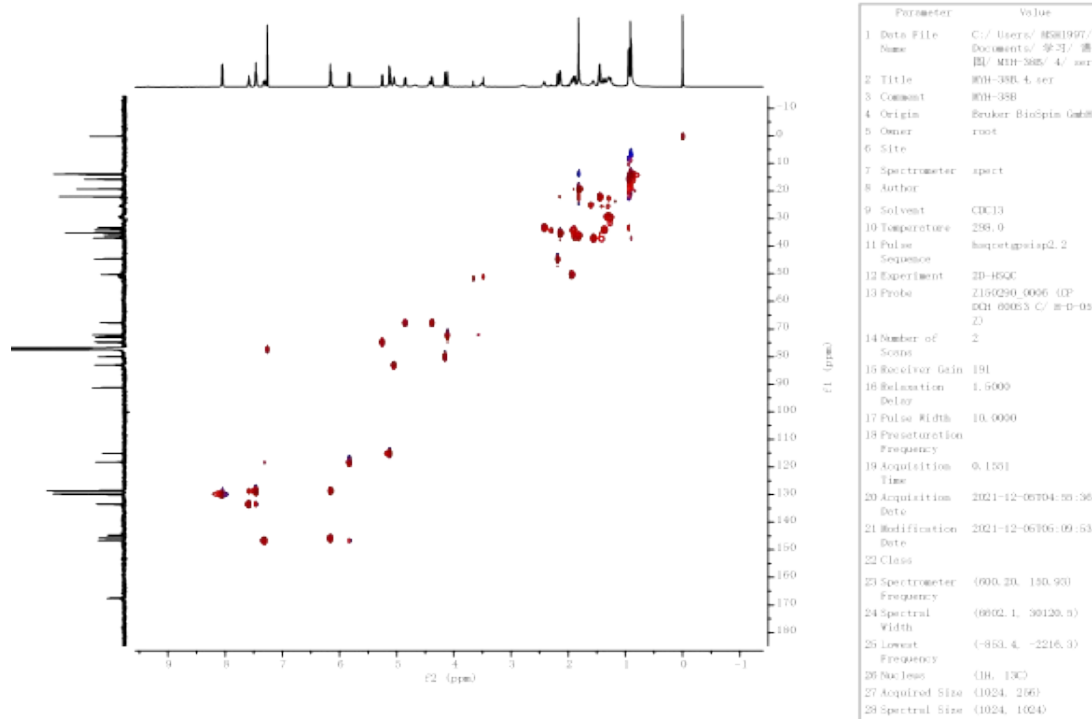

**Figure S6.** HSQC spectrum (600 MHz, CDCl<sub>3</sub>) of compound **1**

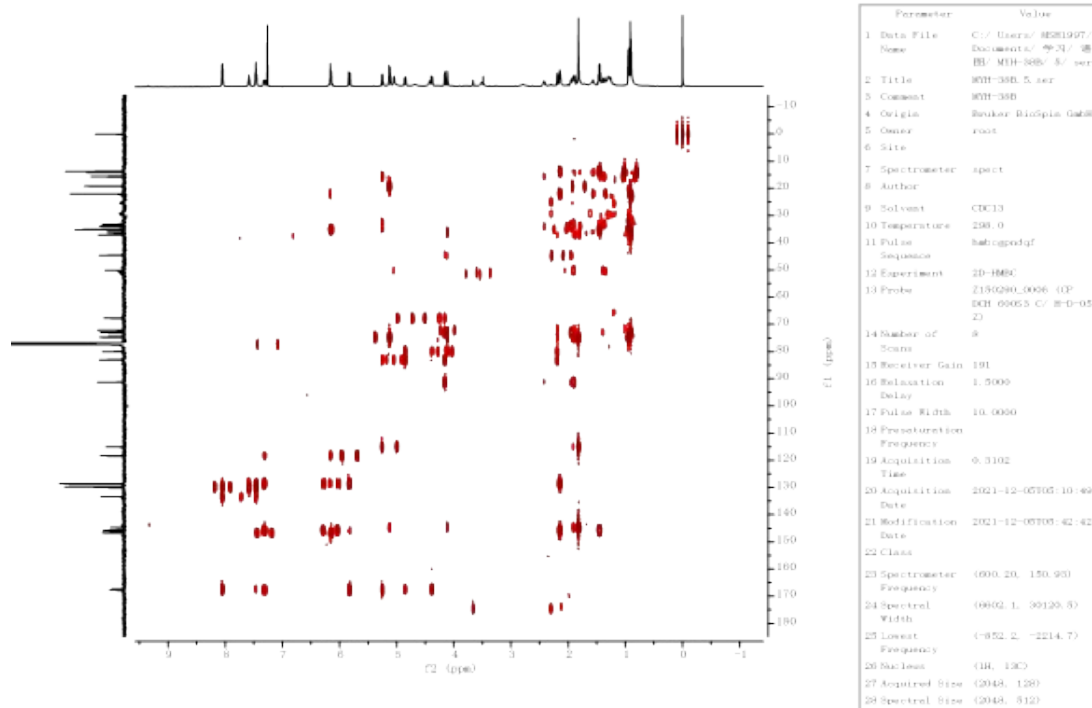

**Figure S7.** HMBC spectrum (600 MHz, CDCl<sub>3</sub>) of compound **1**

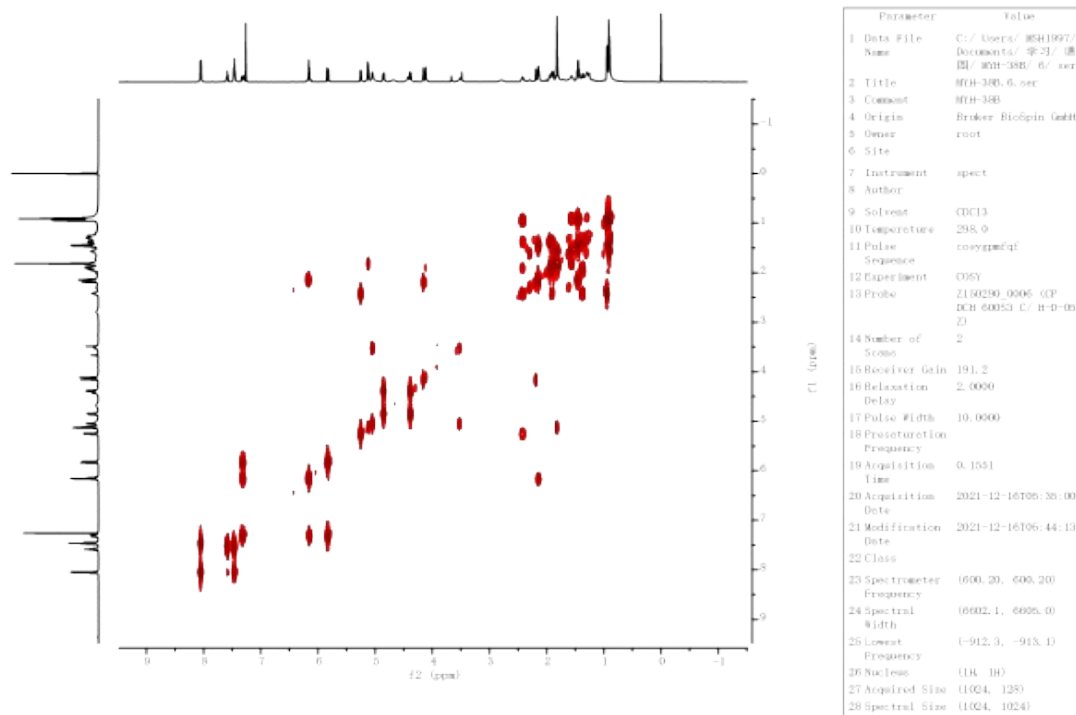

**Figure S8.**  $^1\text{H}$ - $^1\text{H}$  COSY spectrum (600 MHz,  $\text{CDCl}_3$ ) of compound **1**

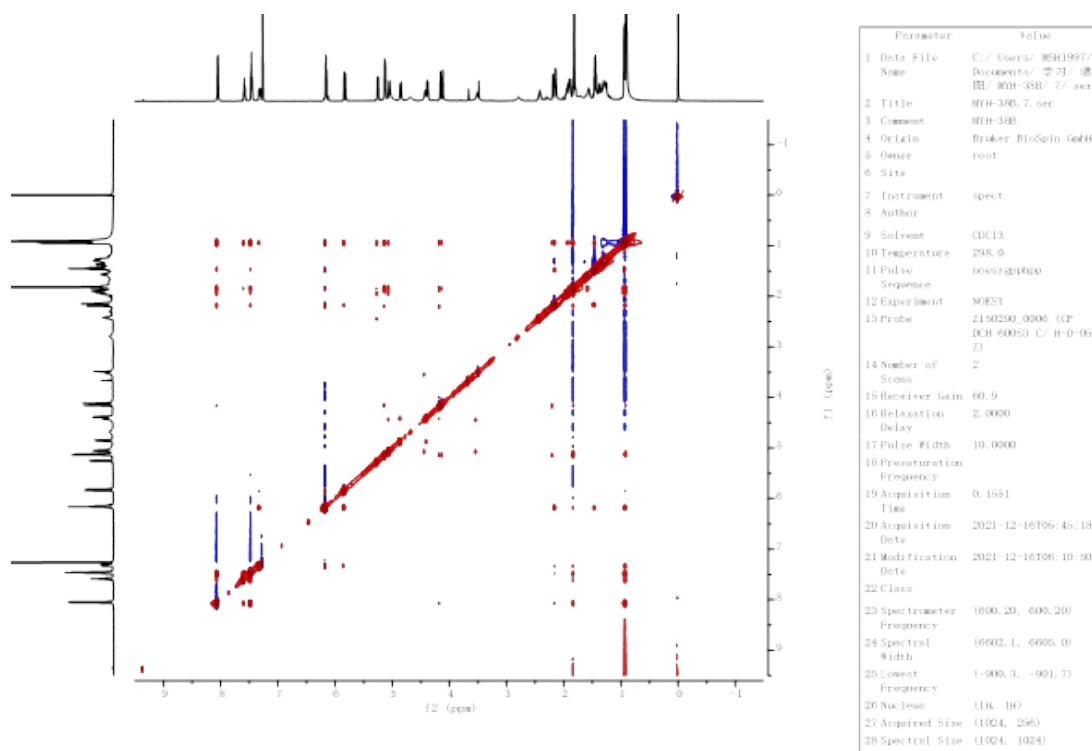

**Figure S9.** NOESY spectrum (600 MHz,  $\text{CDCl}_3$ ) of compound **1**

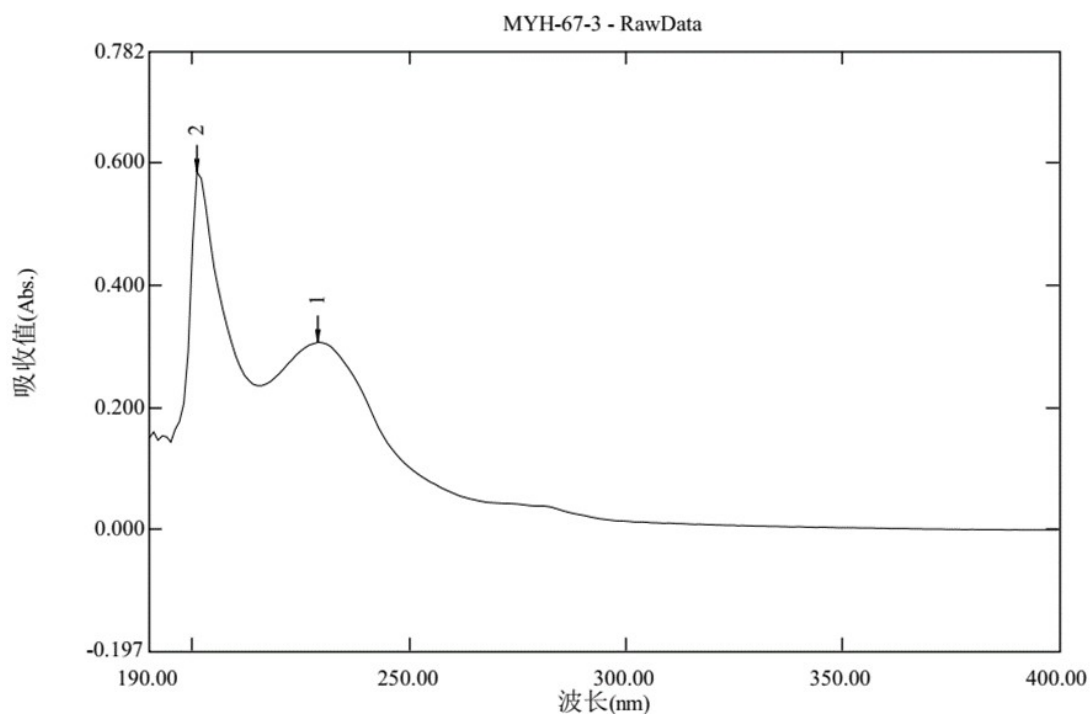

**Figure S10.** UV spectrum of compound **3**

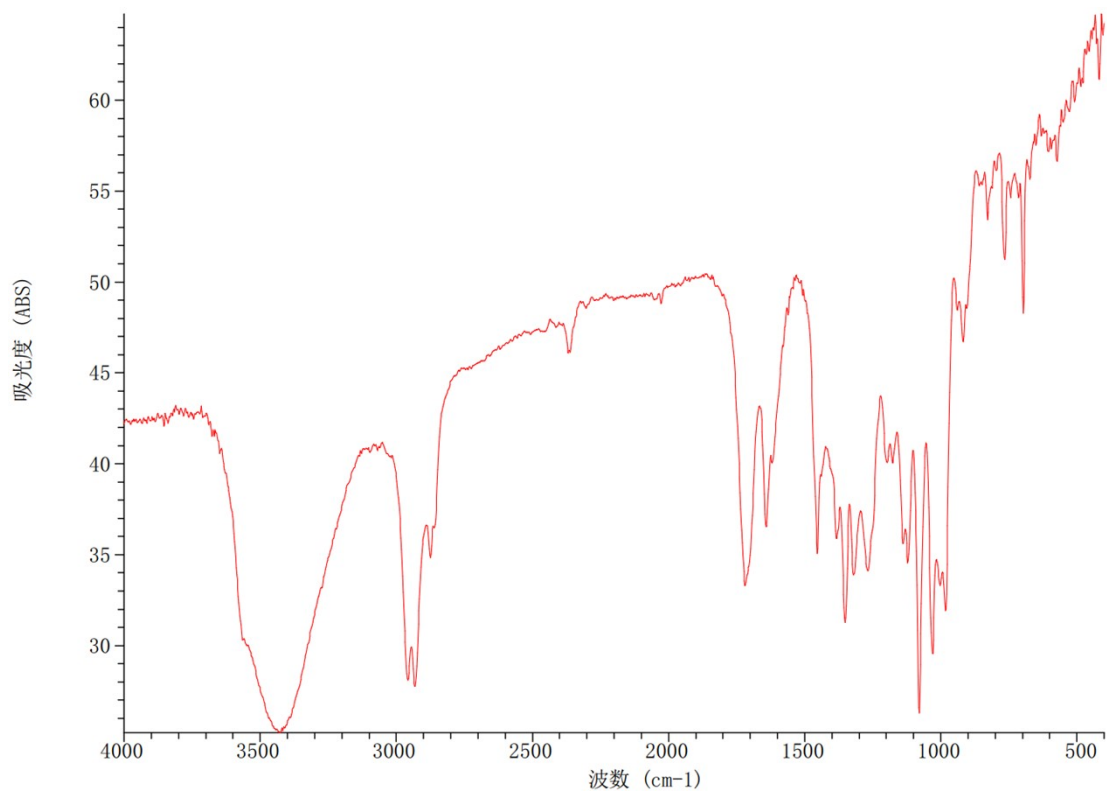

**Figure. S11.** IR spectrum of compound **3**

+MS, 0.2min #25

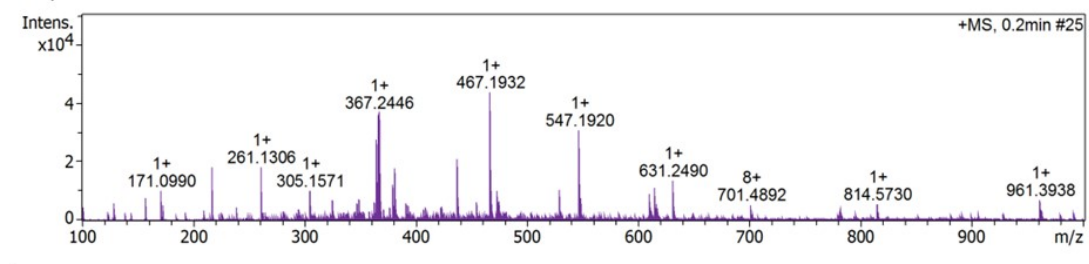

C29H32O9, M+nNa, 547.1939

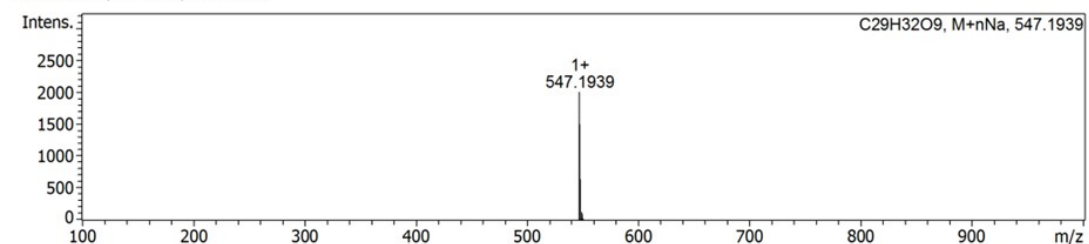

Figure S12. HRESIMS spectrum of compound 3

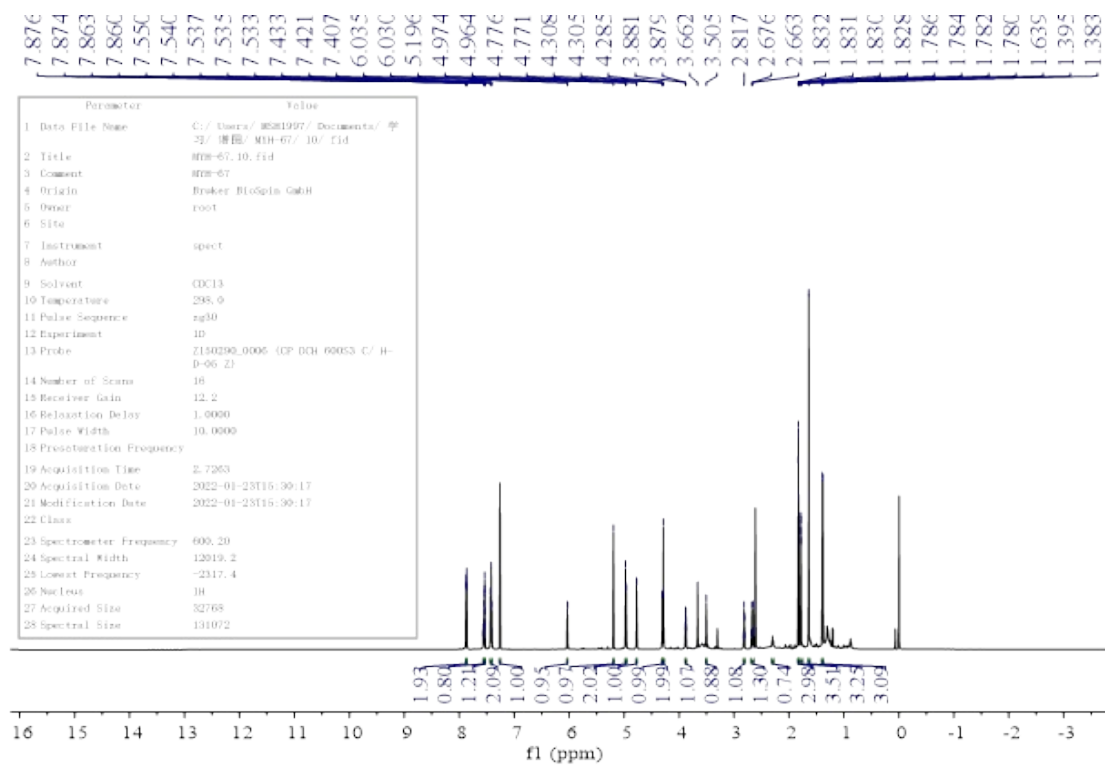

Figure S13. <sup>1</sup>H NMR spectrum (600 MHz, CDCl<sub>3</sub>) of compound 3

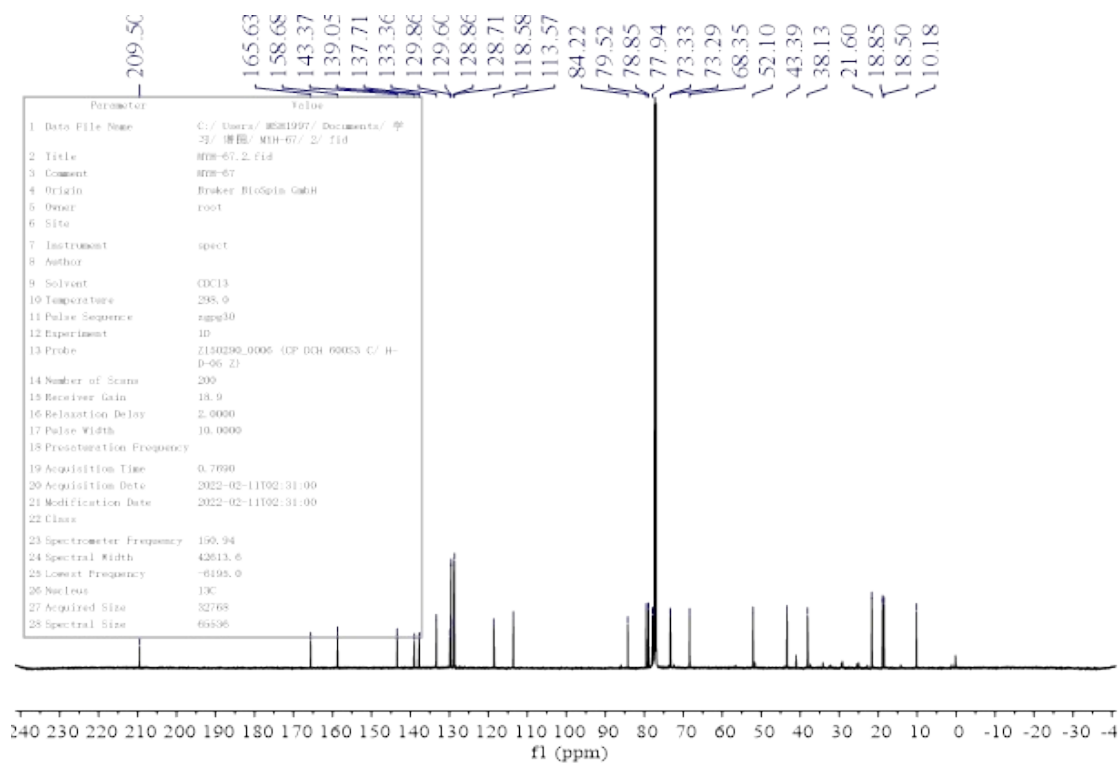

**Figure S14.**  $^{13}\text{C}$  NMR spectrum (150 MHz,  $\text{CDCl}_3$ ) of compound **3**

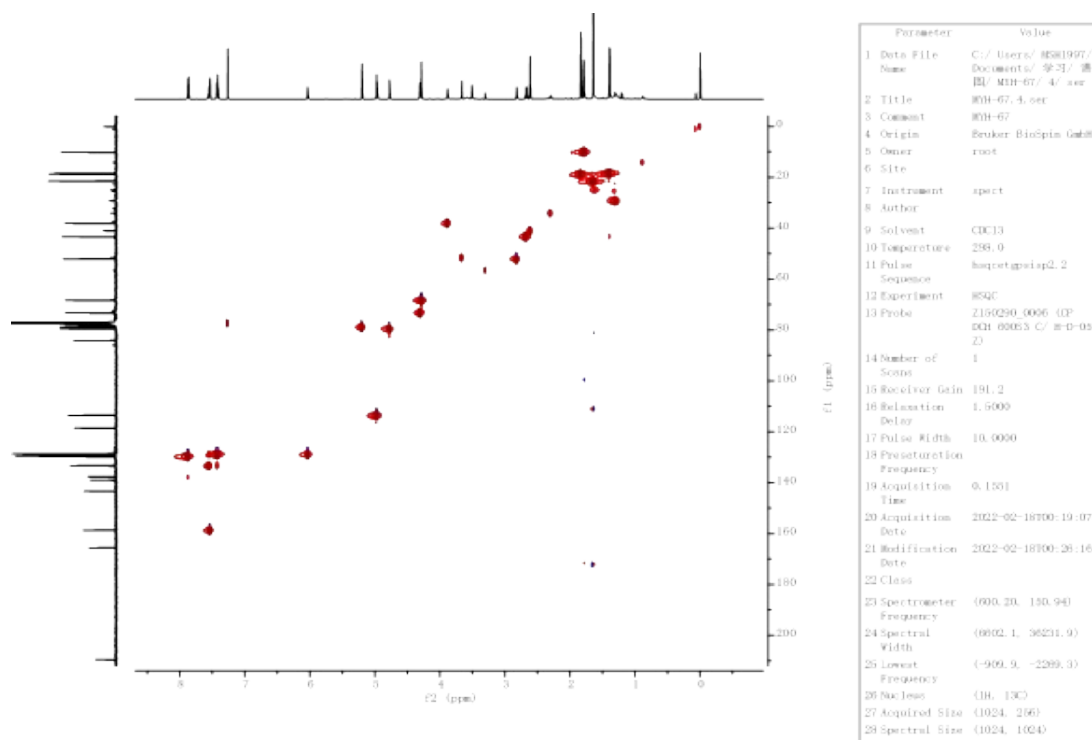

**Figure S15.** HSQC spectrum (600 MHz,  $\text{CDCl}_3$ ) of compound **3**

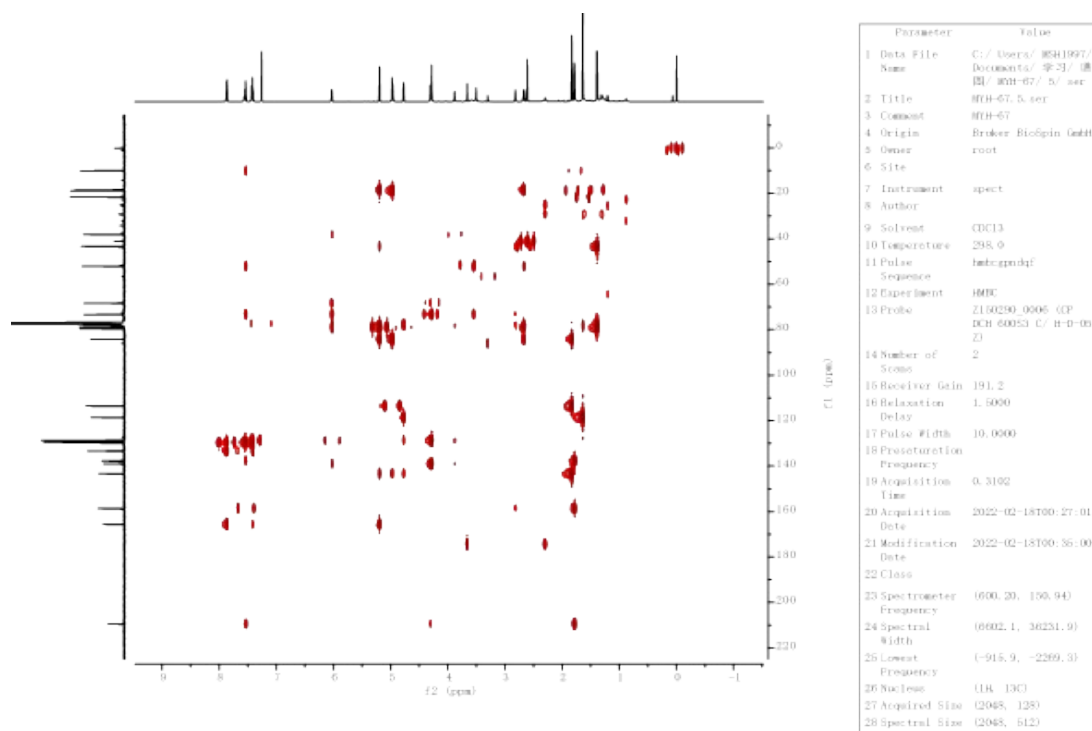

Figure S16. HMBC spectrum (600 MHz, CDCl<sub>3</sub>) of compound **3**

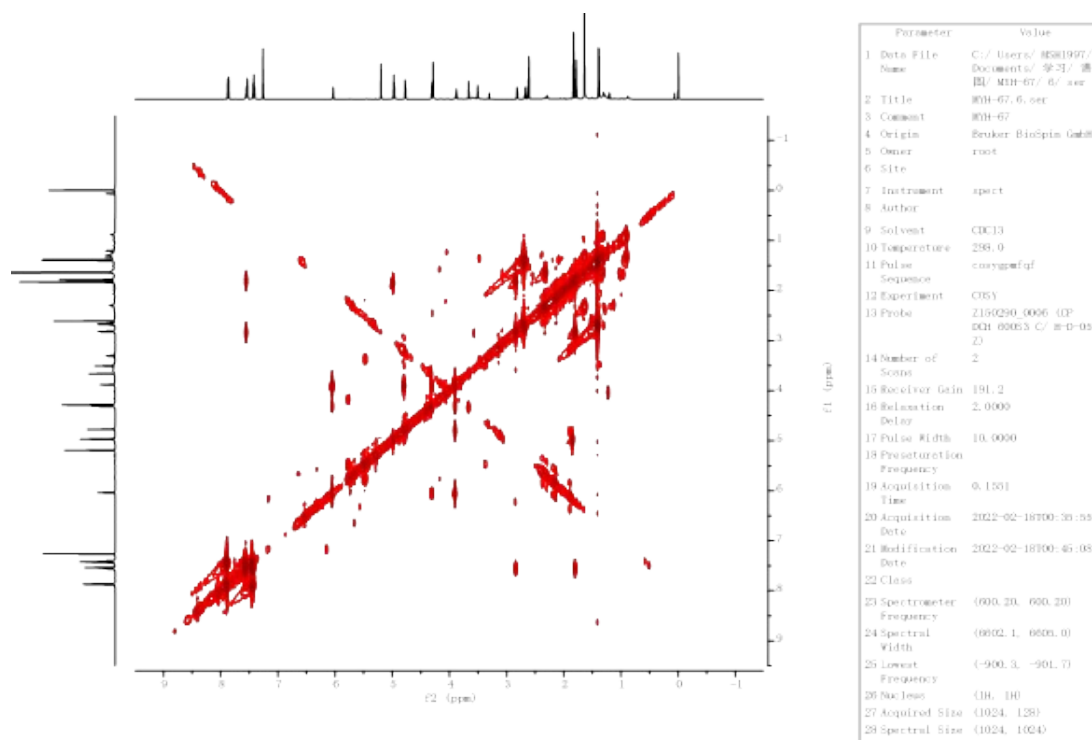

Figure S17. <sup>1</sup>H-<sup>1</sup>H COSY spectrum (600 MHz, CDCl<sub>3</sub>) of compound **3**

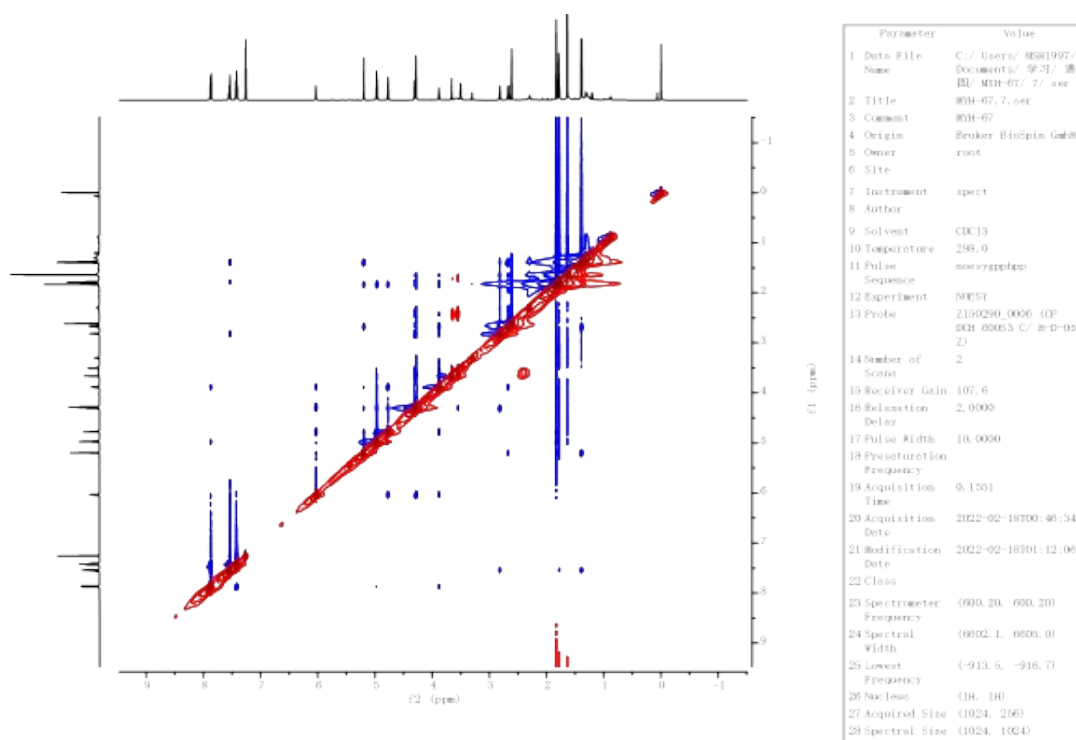

**Figure S18.** NOESY spectrum (600 MHz, CDCl<sub>3</sub>) of compound **3**

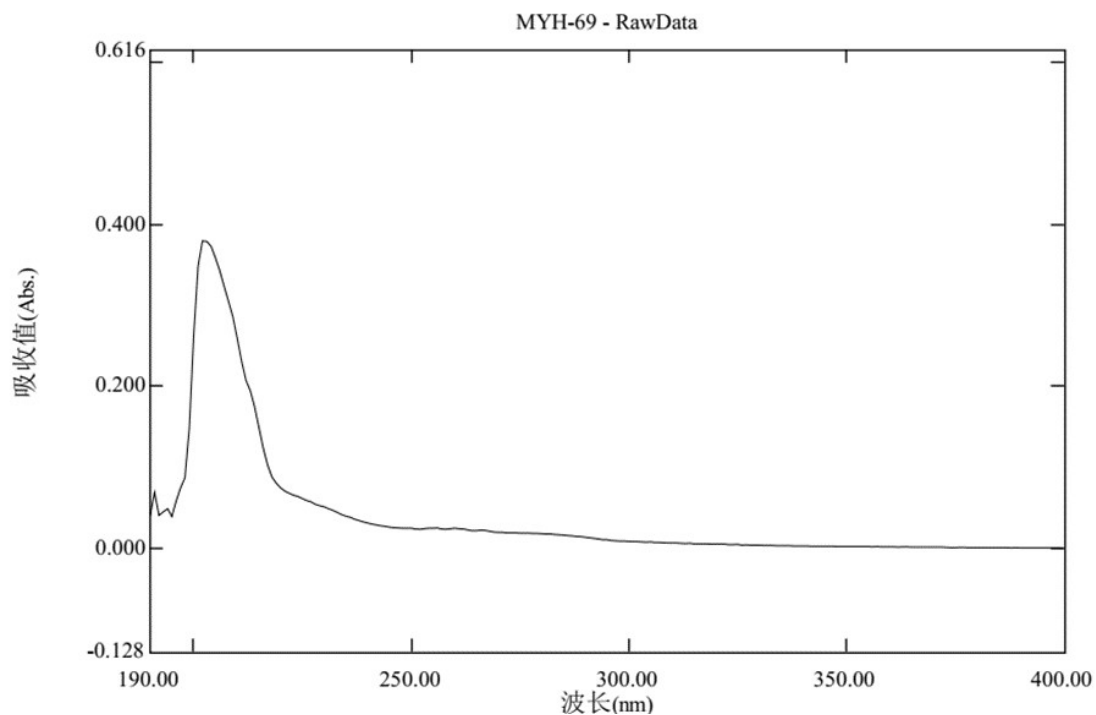

**Figure S19.** UV spectrum of compound **4**

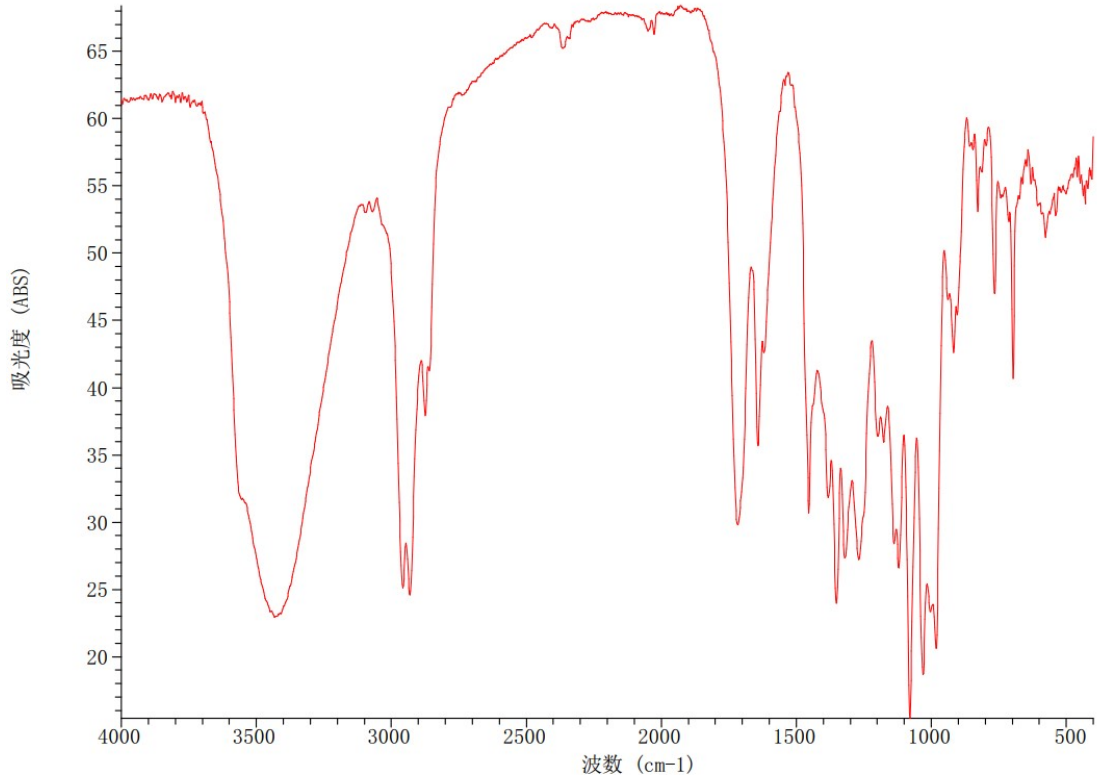

Figure S20. IR spectrum of compound 4

+MS, 0.2min #26

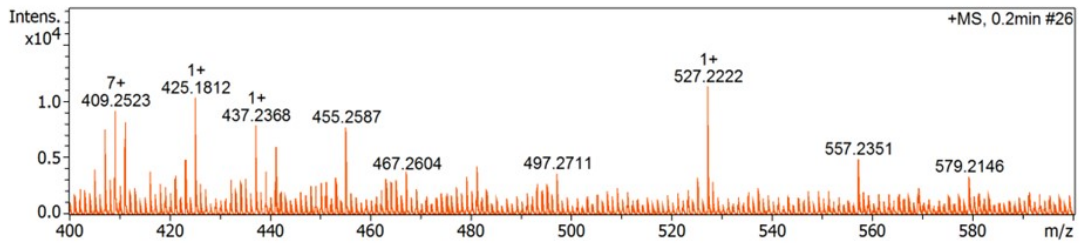

C<sub>30</sub>H<sub>36</sub>O<sub>10</sub>, M+nH, 557.2381

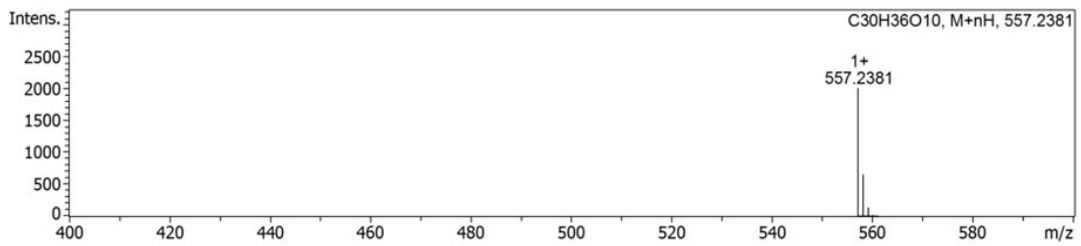

Figure S21. HRESIMS spectrum of compound 4



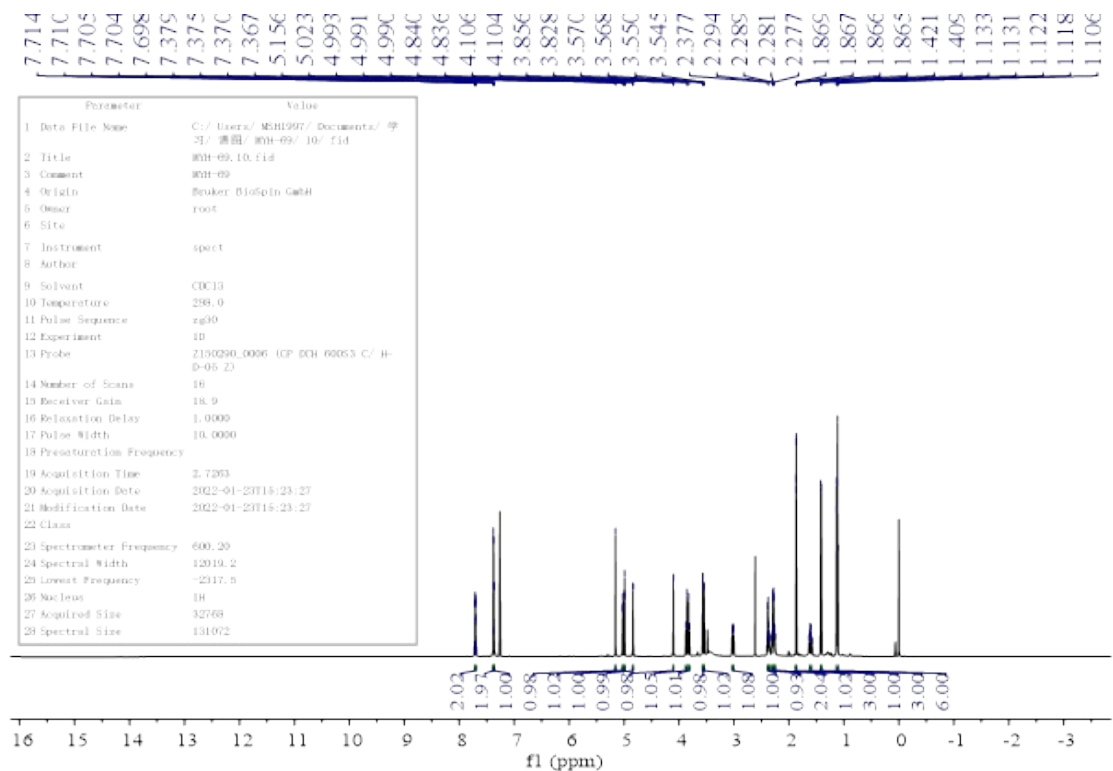

**Figure S22.**  $^1\text{H}$  NMR spectrum (600 MHz,  $\text{CDCl}_3$ ) of compound **4**

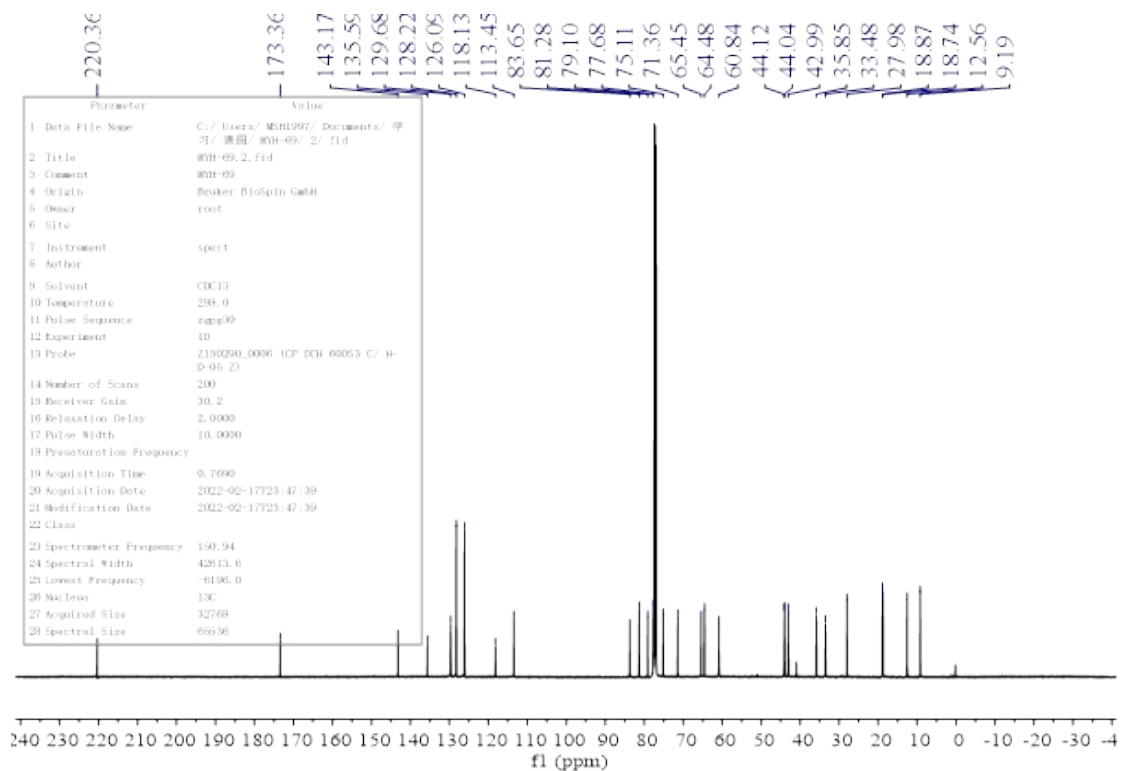

**Figure S23.**  $^{13}\text{C}$  NMR spectrum (150 MHz,  $\text{CDCl}_3$ ) of compound **4**

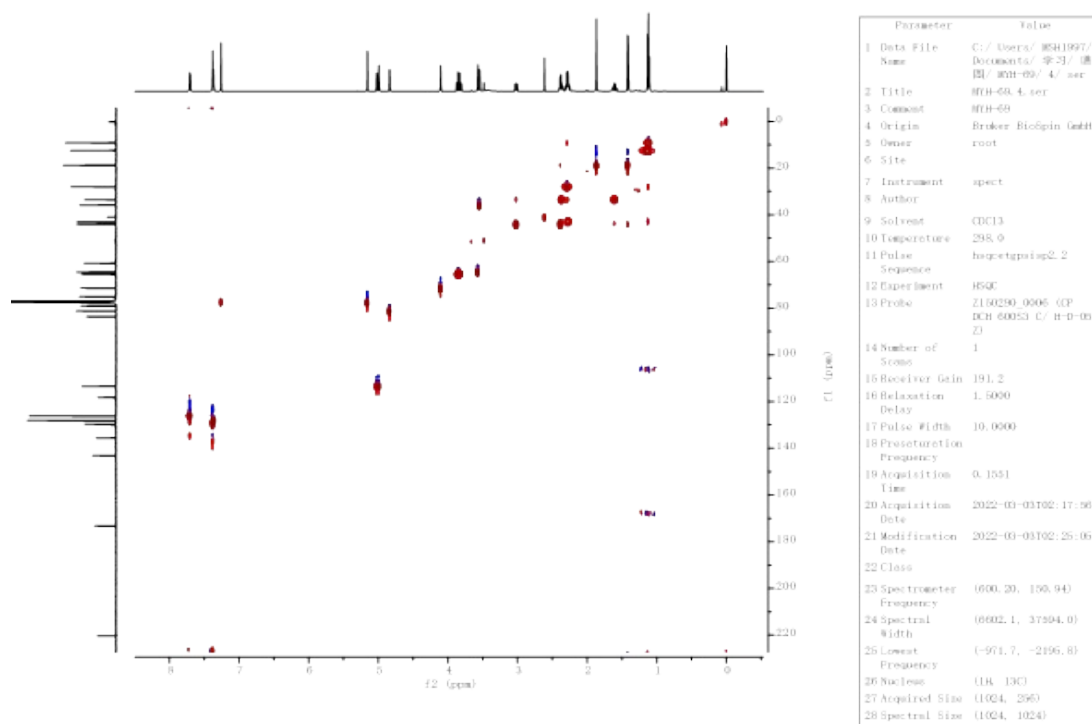

**Figure S24.** HSQC spectrum (600 MHz, CDCl<sub>3</sub>) of compound **4**

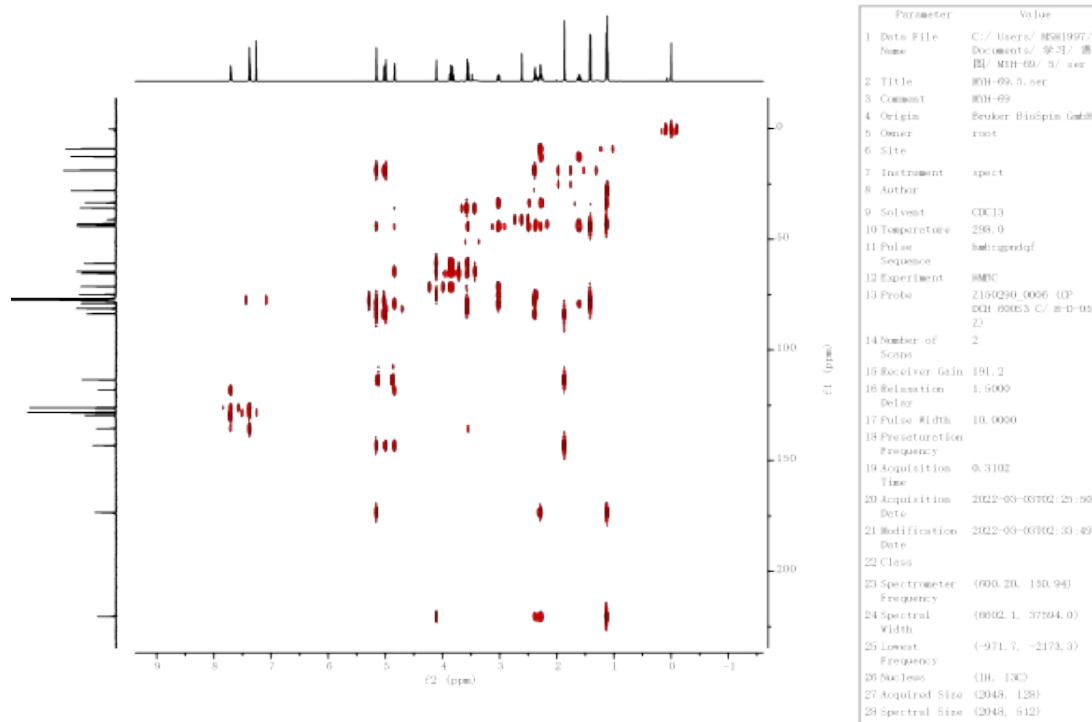

**Figure S25.** HMBC spectrum (600 MHz, CDCl<sub>3</sub>) of compound **4**

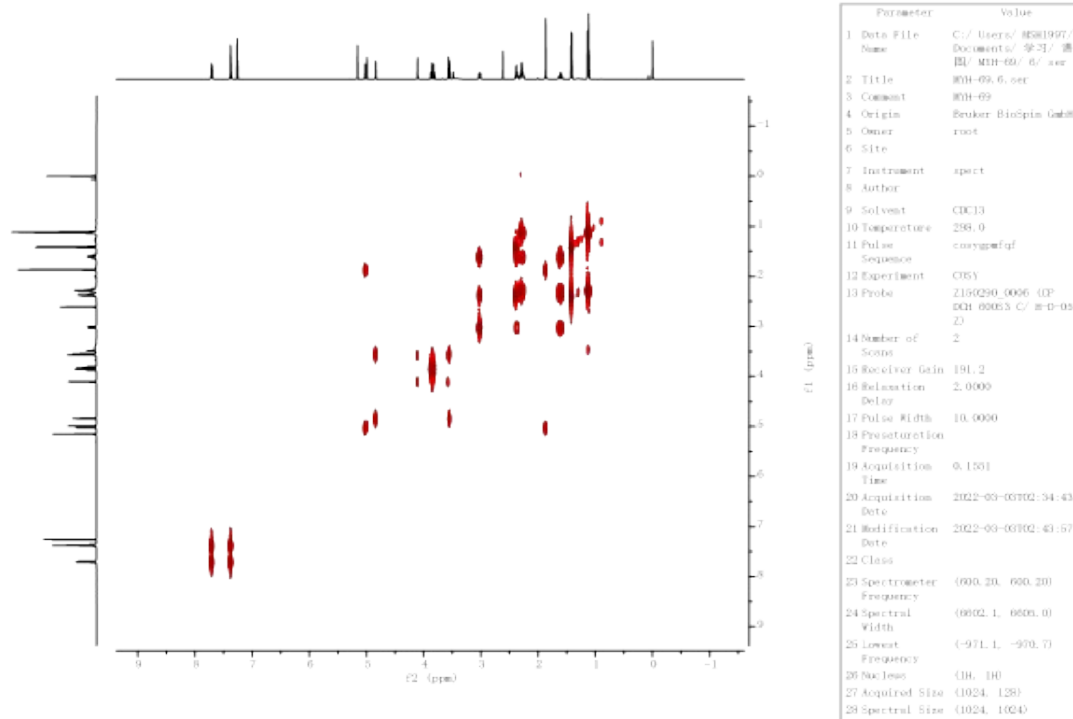

**Figure S26.**  $^1\text{H}$ - $^1\text{H}$  COSY spectrum (600 MHz,  $\text{CDCl}_3$ ) of compound **4**

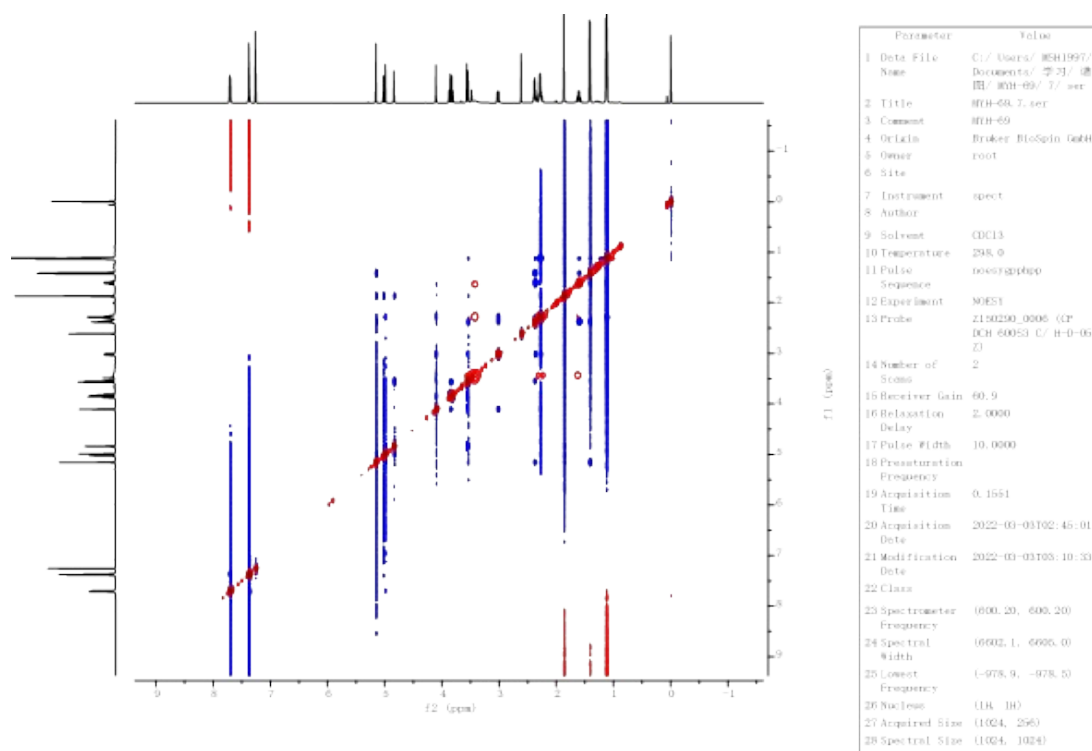

**Figure S27.** NOESY spectrum (600 MHz,  $\text{CDCl}_3$ ) of compound **4**

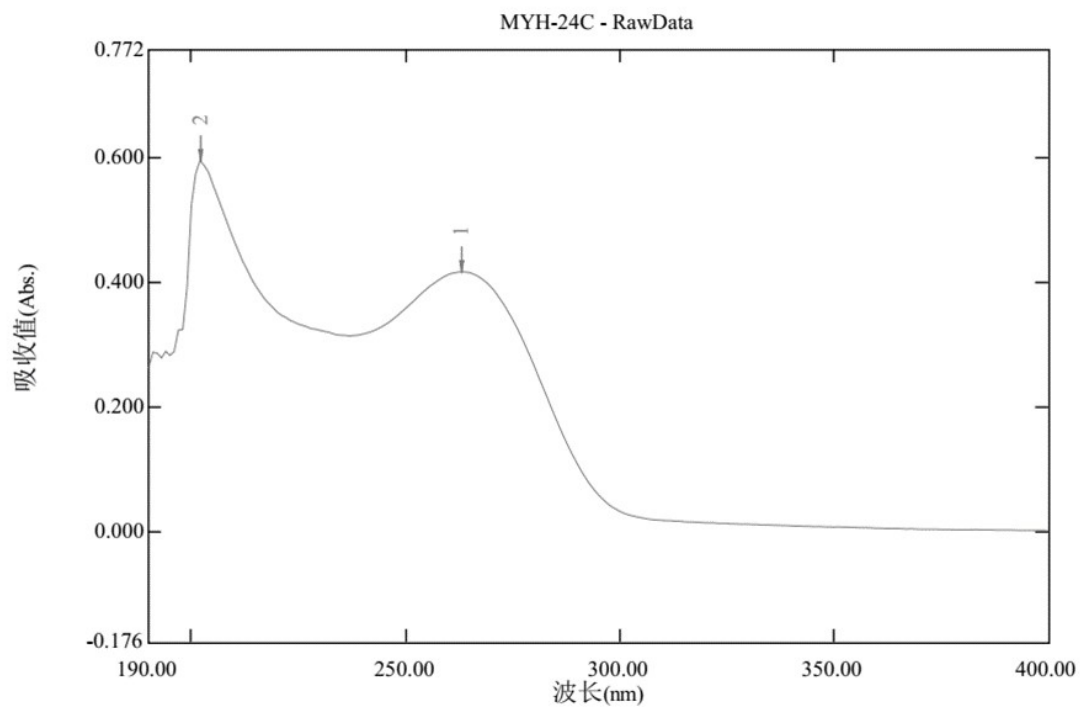

**Figure S28.** UV spectrum of compound **6**

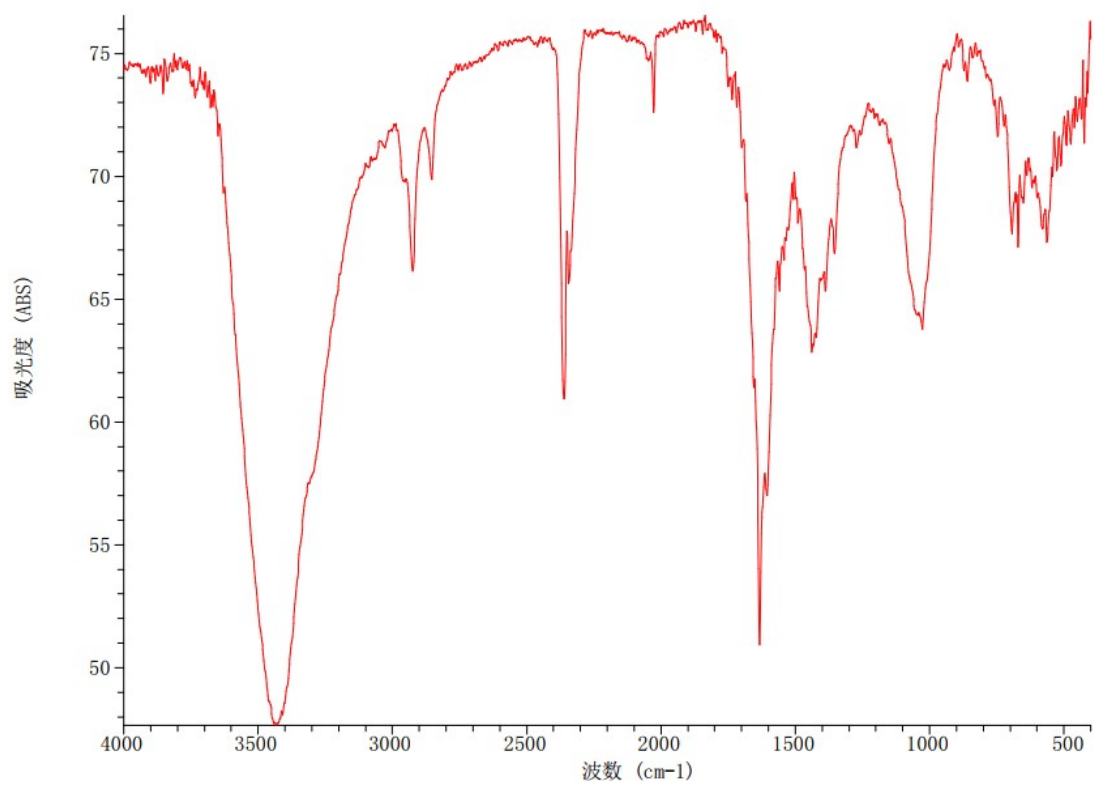

**Figure S29.** IR spectrum of compound **6**

+MS, 0.3min #38

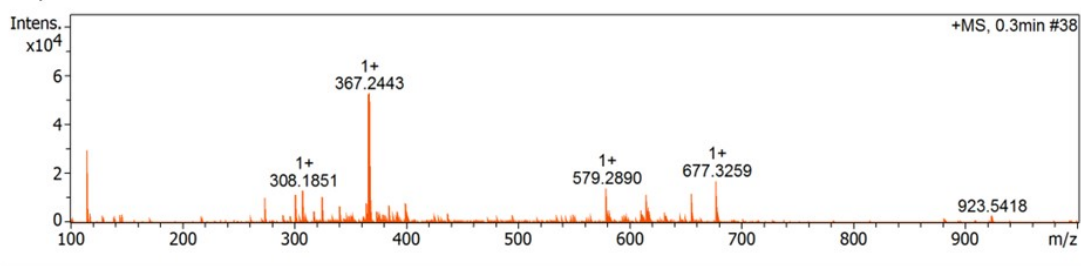

C32H44O8, M+nNa, 579.2928

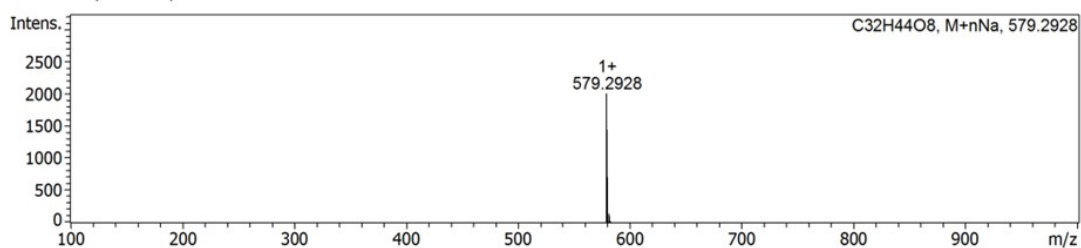

Figure S30. HRESIMS spectrum of compound 6

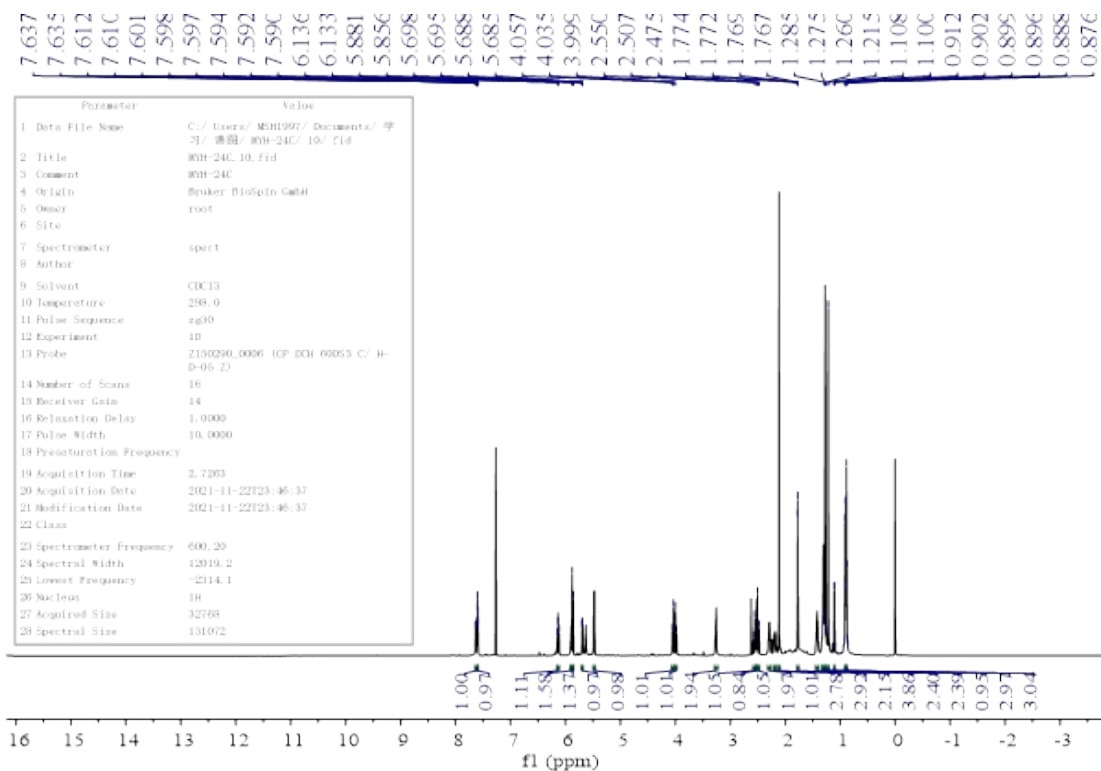

Figure S31. <sup>1</sup>H NMR spectrum (600 MHz, CDCl<sub>3</sub>) of compound 6

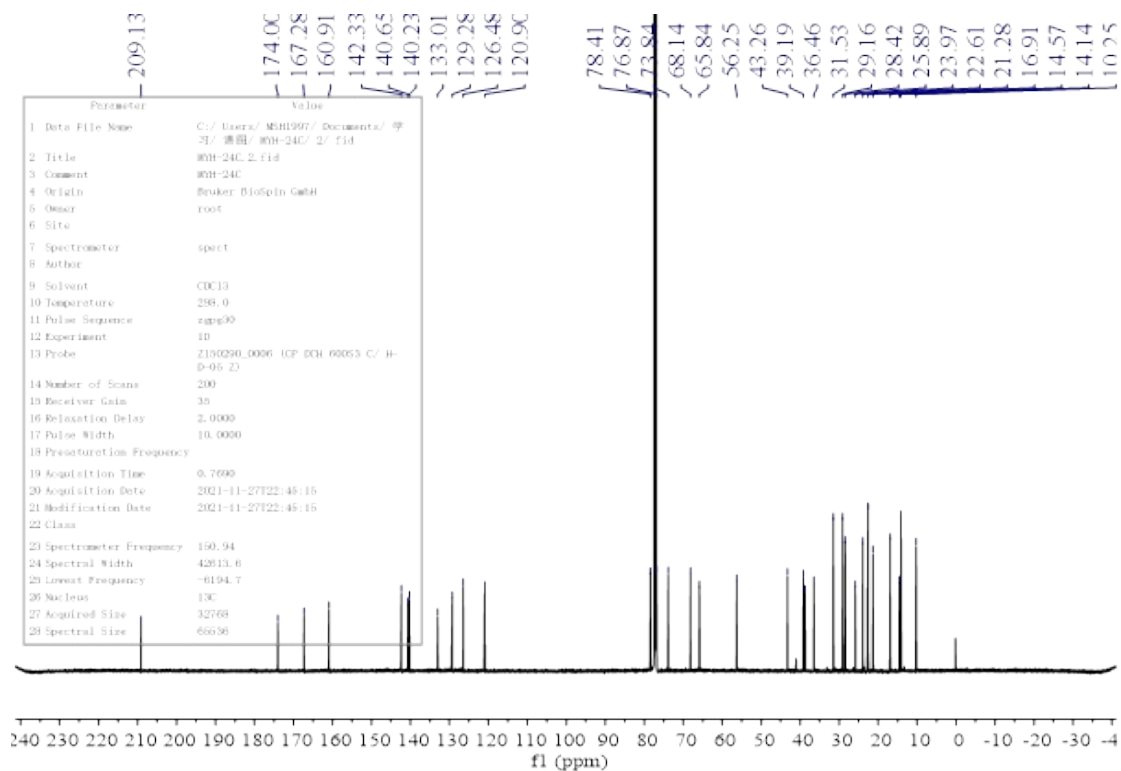

**Figure S32.**  $^{13}\text{C}$  NMR spectrum (150 MHz,  $\text{CDCl}_3$ ) of compound **6**

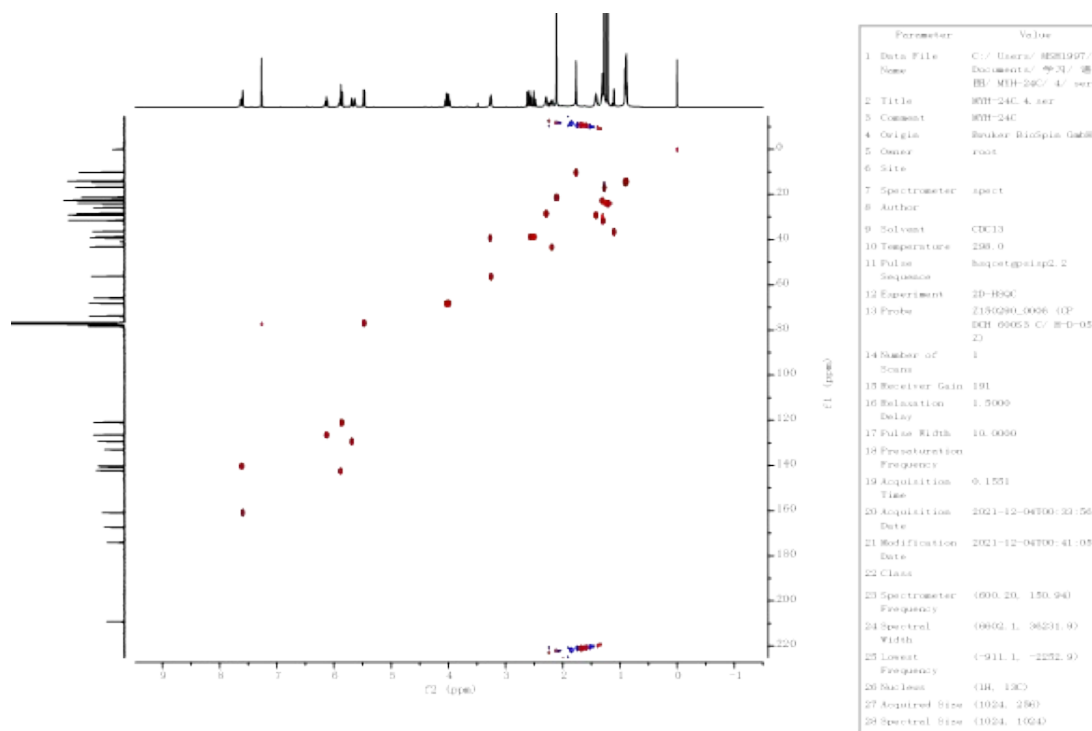

**Figure S33.** HSQC spectrum (600 MHz,  $\text{CDCl}_3$ ) of compound **6**

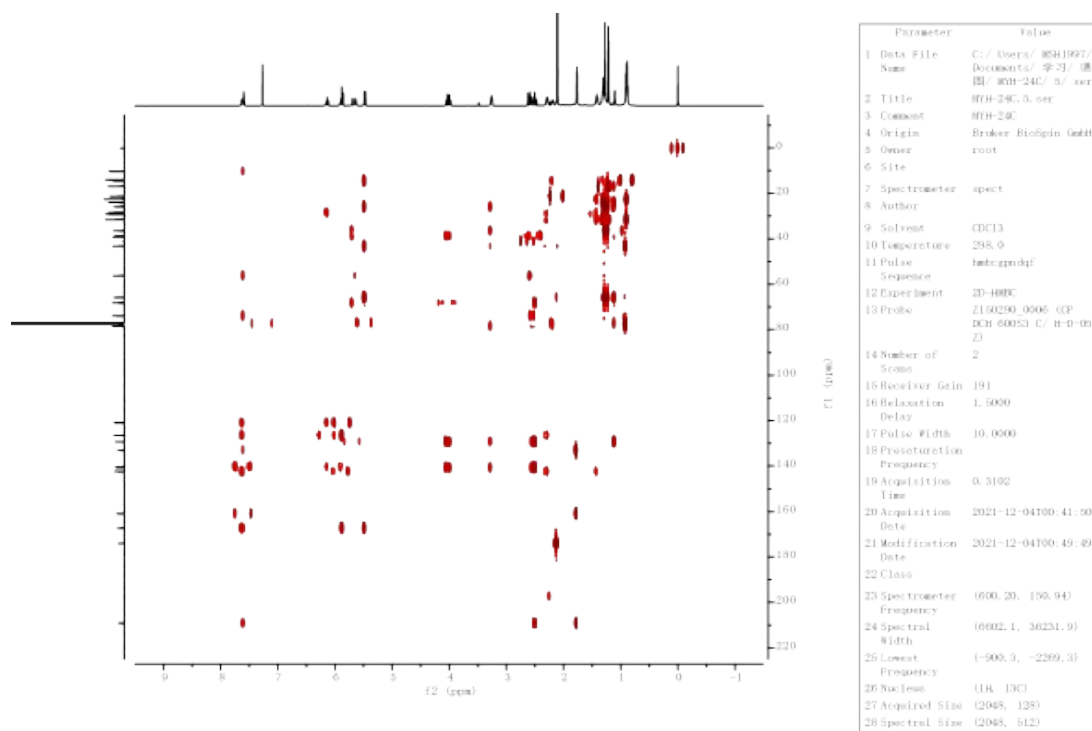

Figure S34. HMBC spectrum (600 MHz, CDCl<sub>3</sub>) of compound 6

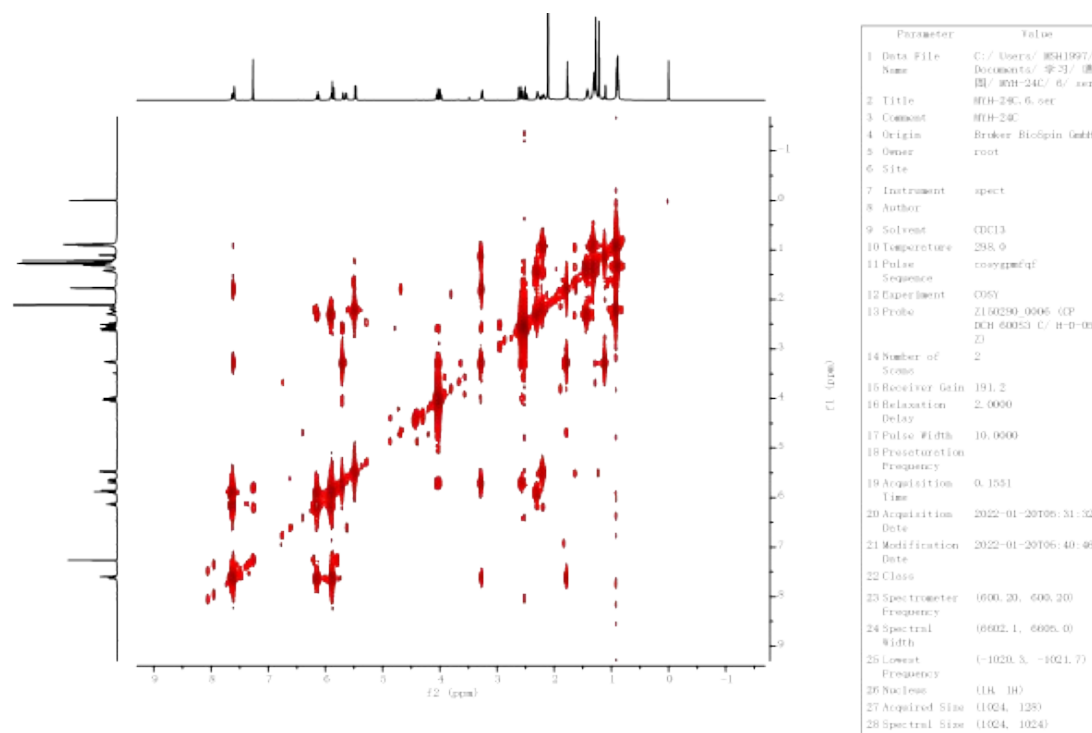

Figure S35. <sup>1</sup>H-<sup>1</sup>H COSY spectrum (600 MHz, CDCl<sub>3</sub>) of compound 6

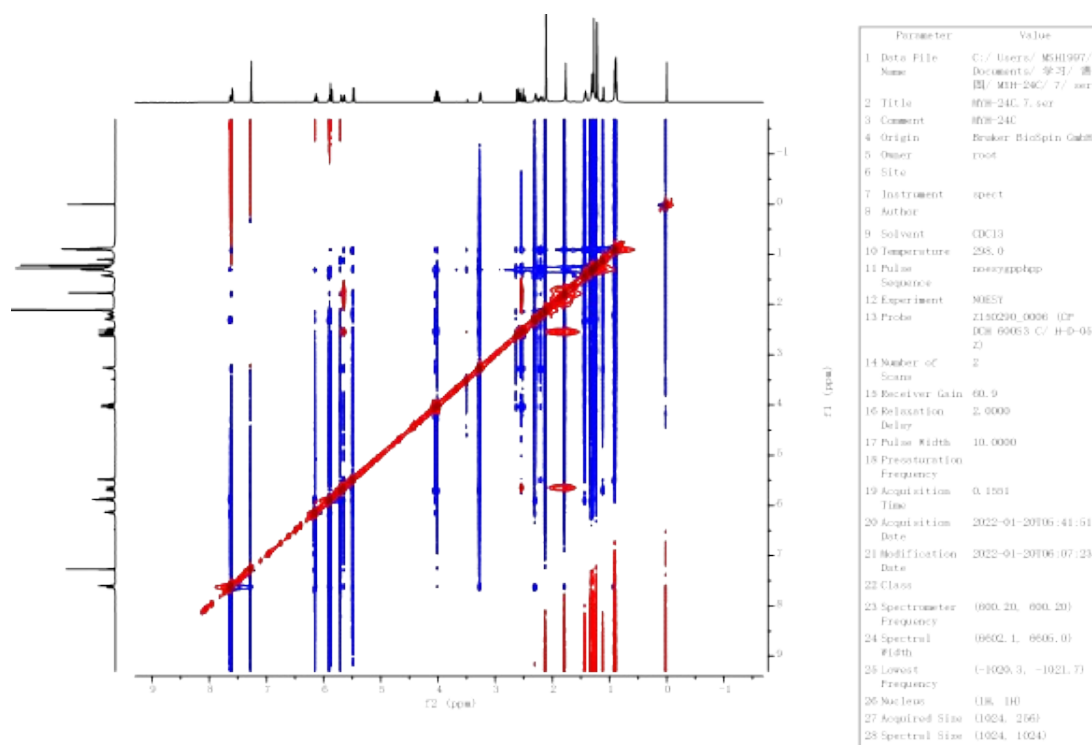

**Figure S36.** NOESY spectrum (600 MHz, CDCl<sub>3</sub>) of compound **6**

**TableS1** The analysis result of MetGem software

| id | m/z parent | Database       |          | row retention time | MYH-C_64_1  | MYH-D_65_1  |
|----|------------|----------------|----------|--------------------|-------------|-------------|
|    |            | search results | row m/z  |                    | _3097.mzXML | _3098.mzXML |
|    |            |                |          |                    | Peak area   | Peak area   |
| 1  | 467.1984   | N/A            | 467.1984 | 28.6958            | 6315032.875 | 61.41       |
| 2  | 529.2144   | N/A            | 529.2144 | 33.5571            | 2516028.285 | 76.29       |
| 3  | 425.1889   | N/A            | 425.1889 | 24.1239            | 1474289.945 | 323.67      |
| 4  | 631.2516   | N/A            | 631.2516 | 25.7695            | 1398672.545 | 25472.33    |
| 5  | 378.2964   | N/A            | 378.2964 | 52.8026            | 2748224.125 | 402.645     |
| 6  | 353.0712   | N/A            | 353.0712 | 20.4511            | 1291442.225 | 84.19       |
| 7  | 545.2371   | N/A            | 545.2371 | 18.3907            | 700462.48   | 39.195      |
| 8  | 631.2502   | N/A            | 631.2502 | 34.7773            | 945866.035  | 10475.13    |
| 9  | 649.2639   | N/A            | 649.2639 | 28.328             | 727338.985  | 85.855      |
| 10 | 631.2508   | N/A            | 631.2508 | 31.9843            | 792121.795  | 1944008.71  |
| 11 | 463.2847   | N/A            | 463.2847 | 53.0987            | 1491518.205 | 256.57      |
| 12 | 337.0708   | N/A            | 337.0708 | 27.0446            | 778327.105  | 89.47       |
| 13 | 375.0513   | N/A            | 375.0513 | 20.5536            | 760827.7    | 37.42       |
| 14 | 677.3267   | N/A            | 677.3267 | 42.8518            | 808965.845  | 20373.795   |
| 15 | 677.3272   | N/A            | 677.3272 | 36.7163            | 1030608.555 | 3249.94     |
| 16 | 527.2271   | N/A            | 527.2271 | 15.9518            | 284764.3775 | 439.5855    |



---

|    |          |     |          |         |            |          |
|----|----------|-----|----------|---------|------------|----------|
| 17 | 814.5804 | N/A | 814.5804 | 9.9099  | 256639.238 | 8.6435   |
| 18 | 701.4962 | N/A | 701.4962 | 9.4809  | 189083.453 | 6.169    |
| 19 | 613.2386 | N/A | 613.2386 | 39.3608 | 374539.89  | 494.305  |
| 20 | 407.1752 | N/A | 407.1752 | 28.7022 | 494020.705 | 113.14   |
| 21 | 308.1272 | N/A | 308.1272 | 27.7787 | 244844.825 | 76.865   |
| 22 | 315.0897 | N/A | 315.0897 | 27.0028 | 555243.685 | 107.2    |
| 23 | 675.3113 | N/A | 675.3113 | 34.7126 | 414263.565 | 5010.355 |
| 24 | 329.1057 | N/A | 329.1057 | 31.2847 | 319817.175 | 33.005   |
| 25 | 695.342  | N/A | 695.342  | 38.7062 | 685275.33  | 59.295   |
| 26 | 649.266  | N/A | 649.266  | 30.2366 | 392178.22  | 124.965  |
| 27 | 321.0761 | N/A | 321.0761 | 34.7283 | 247248.93  | 31.59    |
| 28 | 527.2263 | N/A | 527.2263 | 16.8616 | 178186.72  | 653.08   |
| 29 | 402.2961 | N/A | 402.2961 | 47.5347 | 328685.28  | 356.075  |
| 30 | 464.1923 | N/A | 464.1923 | 28.7208 | 253271.555 | 37.765   |
| 31 | 527.2312 | N/A | 527.2312 | 28.0822 | 284253.745 | 103.545  |
| 32 | 527.2242 | N/A | 527.2242 | 20.5882 | 185182.82  | 289.83   |
| 33 | 313.073  | N/A | 313.073  | 31.2638 | 254333.605 | 198.49   |
| 34 | 701.4998 | N/A | 701.4998 | 10.2968 | 117857.649 | 6.902    |
| 35 | 351.2498 | N/A | 351.2498 | 37.9815 | 413156.725 | 692.52   |
| 36 | 317.1744 | N/A | 317.1744 | 38.4854 | 231118.92  | 193.98   |
| 37 | 662.401  | N/A | 662.401  | 48.674  | 427599.36  | 21.45    |
| 38 | 333.2022 | N/A | 333.2022 | 38.4473 | 227088.935 | 267.63   |
| 39 | 337.2388 | N/A | 337.2388 | 30.3881 | 296853.615 | 149.345  |
| 40 | 363.2149 | N/A | 363.2149 | 40.0254 | 163201.65  | 590.29   |
| 41 | 351.0878 | N/A | 351.0878 | 31.3364 | 143507.965 | 45.54    |
| 42 | 631.2513 | N/A | 631.2513 | 27.6183 | 470077.065 | 12335.51 |
| 43 | 445.3101 | N/A | 445.3101 | 42.491  | 399695.88  | 2731.6   |
| 44 | 430.3305 | N/A | 430.3305 | 55.0087 | 324020.79  | 43.18    |
| 45 | 338.1994 | N/A | 338.1994 | 21.2108 | 140842.045 | 412.545  |
| 46 | 301.0721 | N/A | 301.0721 | 22.5764 | 262151.945 | 398.68   |
| 47 | 409.0909 | N/A | 409.0909 | 21.8437 | 124784.62  | 35.085   |
| 48 | 497.358  | N/A | 497.358  | 50.6603 | 179797.405 | 41.47    |
| 49 | 392.3115 | N/A | 392.3115 | 55.0657 | 302246.66  | 589.855  |
| 50 | 423.2011 | N/A | 423.2011 | 18.3307 | 105501.73  | 123.415  |
| 51 | 336.1813 | N/A | 336.1813 | 48.7443 | 326328.59  | 24.31    |
| 52 | 478.2921 | N/A | 478.2921 | 41.8539 | 185993.57  | 46101.51 |
| 53 | 385.1924 | N/A | 385.1924 | 28.6664 | 189959.045 | 75.6     |
| 54 | 436.3028 | N/A | 436.3028 | 52.9365 | 257859.46  | 160.735  |
| 55 | 631.2532 | N/A | 631.2532 | 30.9352 | 140836.125 | 137.765  |
| 56 | 927.6663 | N/A | 927.6663 | 10.295  | 57186.4995 | 0        |
| 57 | 449.1626 | N/A | 449.1626 | 34.5622 | 139868.565 | 55.035   |
| 58 | 367.2466 | N/A | 367.2466 | 34.2625 | 172734.69  | 449.095  |
| 59 | 461.2688 | N/A | 461.2688 | 51.1942 | 185178.845 | 139.92   |
| 60 | 678.3302 | N/A | 678.3302 | 39.0114 | 195203.605 | 594.44   |

---

---

|     |          |     |          |         |            |           |
|-----|----------|-----|----------|---------|------------|-----------|
| 61  | 677.3325 | N/A | 677.3325 | 52.3875 | 206513.655 | 48.51     |
| 62  | 444.3083 | N/A | 444.3083 | 39.0676 | 382814.61  | 278.8     |
| 63  | 531.2209 | N/A | 531.2209 | 33.4207 | 153097.84  | 44.7      |
| 64  | 727.1064 | N/A | 727.1064 | 20.5073 | 147714.865 | 9.12      |
| 65  | 478.2945 | N/A | 478.2945 | 42.6058 | 178866.295 | 619.23    |
| 66  | 393.2612 | N/A | 393.2612 | 32.665  | 315256.03  | 179.42    |
| 67  | 353.2708 | N/A | 353.2708 | 41.8882 | 125191.585 | 210.51    |
| 68  | 447.3281 | N/A | 447.3281 | 40.9719 | 457947.04  | 118.205   |
| 69  | 509.2159 | N/A | 509.2159 | 25.7782 | 143769.44  | 532.335   |
| 70  | 353.2291 | N/A | 353.2291 | 21.5137 | 158202.55  | 507.285   |
| 71  | 338.0496 | N/A | 338.0496 | 20.5031 | 122311.785 | 71.15     |
| 72  | 355.2237 | N/A | 355.2237 | 53.0359 | 183705.93  | 75.345    |
| 73  | 631.2519 | N/A | 631.2519 | 41.0027 | 83210.085  | 24.195    |
| 74  | 349.2008 | N/A | 349.2008 | 33.3308 | 81654.875  | 93.25     |
| 75  | 319.1938 | N/A | 319.1938 | 29.9898 | 77129.48   | 109.155   |
| 76  | 449.3057 | N/A | 449.3057 | 45.8738 | 84219.06   | 126.47    |
| 77  | 693.3232 | N/A | 693.3232 | 36.7792 | 173967.01  | 395.08    |
| 78  | 477.3367 | N/A | 477.3367 | 53.3443 | 154012.855 | 88.06     |
| 79  | 390.338  | N/A | 390.338  | 56.13   | 194185.52  | 128.085   |
| 80  | 631.2497 | N/A | 631.2497 | 39.2313 | 85099.22   | 219041.28 |
| 81  | 480.3081 | N/A | 480.3081 | 40.3432 | 241629.83  | 438.4     |
| 82  | 437.1977 | N/A | 437.1977 | 29.4324 | 72101.69   | 190.285   |
| 83  | 374.2318 | N/A | 374.2318 | 41.4433 | 81072.69   | 44.12     |
| 84  | 573.3025 | N/A | 573.3025 | 38.7297 | 166993.575 | 78.065    |
| 85  | 661.4199 | N/A | 661.4199 | 45.8023 | 94702.99   | 58.88     |
| 86  | 315.0852 | N/A | 315.0852 | 25.6325 | 75516.075  | 55.65     |
| 87  | 402.2611 | N/A | 402.2611 | 37.0676 | 93892.61   | 369.57    |
| 88  | 309.0095 | N/A | 309.0095 | 19.0363 | 94449.02   | 69.765    |
| 89  | 707.3018 | N/A | 707.3018 | 38.0264 | 68476.05   | 159.06    |
| 90  | 331.2217 | N/A | 331.2217 | 45.9771 | 107036.21  | 182.69    |
| 91  | 331.1879 | N/A | 331.1879 | 45.3029 | 68033.315  | 149.49    |
| 92  | 677.4128 | N/A | 677.4128 | 52.6052 | 318588.255 | 120.96    |
| 93  | 411.2528 | N/A | 411.2528 | 42.8836 | 71086.155  | 143.655   |
| 94  | 927.6639 | N/A | 927.6639 | 11.1706 | 29878.5805 | 5.291     |
| 95  | 677.3254 | N/A | 677.3254 | 47.845  | 184601.83  | 339.57    |
| 96  | 709.3185 | N/A | 709.3185 | 31.5851 | 75685.43   | 382.58    |
| 97  | 669.2557 | N/A | 669.2557 | 21.3961 | 55607.365  | 90.185    |
| 98  | 400.2853 | N/A | 400.2853 | 34.9169 | 126143.45  | 71.035    |
| 99  | 659.3223 | N/A | 659.3223 | 46.8805 | 99278.915  | 116.16    |
| 100 | 432.3113 | N/A | 432.3113 | 35.9832 | 194547.75  | 115.15    |
| 101 | 549.3161 | N/A | 549.3161 | 48.5948 | 139262.07  | 48.115    |
| 102 | 675.4391 | N/A | 675.4391 | 46.9333 | 86405.49   | 64.805    |
| 103 | 806.3973 | N/A | 806.3973 | 45.4887 | 51410.035  | 19.84     |
| 104 | 353.23   | N/A | 353.23   | 19.231  | 150807.96  | 2131.19   |

---

---

|     |          |     |          |         |            |            |
|-----|----------|-----|----------|---------|------------|------------|
| 105 | 301.0723 | N/A | 301.0723 | 19.3554 | 59563.765  | 654.06     |
| 106 | 349.2016 | N/A | 349.2016 | 31.6732 | 63151.19   | 88.74      |
| 107 | 335.1868 | N/A | 335.1868 | 24.9886 | 46088.045  | 161.98     |
| 108 | 404.2748 | N/A | 404.2748 | 36.193  | 178669.565 | 140.53     |
| 109 | 613.2448 | N/A | 613.2448 | 30.7924 | 58635.325  | 113.975    |
| 110 | 311.0585 | N/A | 311.0585 | 31.2474 | 75014.835  | 71.19      |
| 111 | 443.169  | N/A | 443.169  | 12.0627 | 43076.0605 | 531.286    |
| 112 | 307.0625 | N/A | 307.0625 | 26.2838 | 55778.135  | 54.21      |
| 113 | 543.3207 | N/A | 543.3207 | 42.3858 | 65712.06   | 90.55      |
| 114 | 385.1907 | N/A | 385.1907 | 24.0582 | 49674.22   | 326        |
| 115 | 332.2974 | N/A | 332.2974 | 58.594  | 88800.825  | 24.72      |
| 116 | 427.27   | N/A | 427.27   | 16.591  | 64693.8825 | 168.19     |
| 117 | 372.1827 | N/A | 372.1827 | 21.6102 | 37290.32   | 57.72      |
| 118 | 675.3113 | N/A | 675.3113 | 40.8915 | 128935.025 | 2366.48    |
| 119 | 695.3396 | N/A | 695.3396 | 42.1555 | 52629.91   | 69.345     |
| 120 | 353.2044 | N/A | 353.2044 | 30.3522 | 46512.165  | 103.29     |
| 121 | 443.2798 | N/A | 443.2798 | 41.9202 | 61984.52   | 106.305    |
| 122 | 689.294  | N/A | 689.294  | 37.0198 | 55663.205  | 123.21     |
| 123 | 509.2154 | N/A | 509.2154 | 30.9074 | 51816.005  | 200.72     |
| 124 | 475.3357 | N/A | 475.3357 | 10.3802 | 30522.0215 | 14.04      |
| 125 | 462.3223 | N/A | 462.3223 | 32.7851 | 52527.8    | 111.15     |
| 126 | 395.2741 | N/A | 395.2741 | 35.8143 | 111004.22  | 145.78     |
| 127 | 317.2089 | N/A | 317.2089 | 37.6998 | 107552.7   | 269.75     |
| 128 | 422.1833 | N/A | 422.1833 | 24.0852 | 34508.97   | 36.48      |
| 129 | 402.2643 | N/A | 402.2643 | 38.3613 | 64466.49   | 113.38     |
| 130 | 693.3254 | N/A | 693.3254 | 26.054  | 43379.335  | 193.3      |
| 131 | 527.2308 | N/A | 527.2308 | 30.0421 | 68279.99   | 62.68      |
| 132 | 334.2012 | N/A | 334.2012 | 42.2175 | 67760.405  | 183.435    |
| 133 | 477.3017 | N/A | 477.3017 | 56.2462 | 106019.815 | 225.12     |
| 134 | 419.2453 | N/A | 419.2453 | 39.0397 | 76280.565  | 85.8       |
| 135 | 509.2149 | N/A | 509.2149 | 34.7657 | 54939.84   | 226.995    |
| 136 | 555.2925 | N/A | 555.2925 | 36.6082 | 83795.895  | 964.35     |
| 137 | 359.2185 | N/A | 359.2185 | 30.369  | 45890.275  | 153.975    |
| 138 | 711.3333 | N/A | 711.3333 | 29.0453 | 60909.87   | 173.72     |
| 139 | 505.2464 | N/A | 505.2464 | 28.0031 | 44754.265  | 157.715    |
| 140 | 737.2635 | N/A | 737.2635 | 22.6578 | 39067.175  | 40.185     |
| 141 | 625.2079 | N/A | 625.2079 | 35.6409 | 42156.14   | 27.54      |
| 142 | 404.3122 | N/A | 404.3122 | 53.4447 | 84955.4    | 140.605    |
| 143 | 501.3507 | N/A | 501.3507 | 57.8712 | 95245.875  | 1497.275   |
| 144 | 323.151  | N/A | 323.151  | 15.2255 | 33751.8105 | 28170.9065 |
| 145 | 353.2329 | N/A | 353.2329 | 26.2204 | 77971.45   | 134.68     |
| 146 | 588.4093 | N/A | 588.4093 | 35.2222 | 72669.22   | 75.305     |
| 147 | 476.2802 | N/A | 476.2802 | 45.8422 | 48136.605  | 31.565     |
| 148 | 491.2051 | N/A | 491.2051 | 39.2737 | 45243.62   | 170.605    |

---

---

|     |          |     |          |         |            |           |
|-----|----------|-----|----------|---------|------------|-----------|
| 149 | 567.2542 | N/A | 567.2542 | 32.6869 | 39773.37   | 128.22    |
| 150 | 649.2988 | N/A | 649.2988 | 31.1527 | 42442.455  | 92.54     |
| 151 | 531.325  | N/A | 531.325  | 39.0641 | 50555.555  | 85.3      |
| 152 | 651.1468 | N/A | 651.1468 | 26.9388 | 53820.815  | 79.38     |
| 153 | 707.3017 | N/A | 707.3017 | 28.1876 | 38351.515  | 266.26    |
| 154 | 316.2275 | N/A | 316.2275 | 32.3904 | 48495.725  | 56.91     |
| 155 | 405.1901 | N/A | 405.1901 | 15.8915 | 25353.6585 | 772.0455  |
| 156 | 563.3301 | N/A | 563.3301 | 52.7307 | 144895.085 | 131.67    |
| 157 | 414.2955 | N/A | 414.2955 | 55.1024 | 131360.055 | 80.185    |
| 158 | 475.3346 | N/A | 475.3346 | 11.1443 | 23565.824  | 19.599    |
| 159 | 393.2617 | N/A | 393.2617 | 29.1453 | 86137.395  | 1862.43   |
| 160 | 593.2636 | N/A | 593.2636 | 35.4998 | 35594.545  | 462.495   |
| 161 | 434.2874 | N/A | 434.2874 | 29.4344 | 96082.695  | 127.05    |
| 162 | 523.3617 | N/A | 523.3617 | 56.6313 | 61067.295  | 146.865   |
| 163 | 448.3041 | N/A | 448.3041 | 34.1268 | 106861.745 | 201.385   |
| 164 | 693.3215 | N/A | 693.3215 | 31.2233 | 57828.885  | 397.955   |
| 165 | 678.3312 | N/A | 678.3312 | 37.7327 | 35739.83   | 151.49    |
| 166 | 588.4139 | N/A | 588.4139 | 9.1487  | 22884.333  | 10.648    |
| 167 | 418.7908 | N/A | 418.7908 | 10.042  | 34880.429  | 0         |
| 168 | 374.3042 | N/A | 374.3042 | 45.9252 | 52956.29   | 36.2      |
| 169 | 307.061  | N/A | 307.061  | 25.9543 | 22678.37   | 141.11    |
| 170 | 456.2025 | N/A | 456.2025 | 28.9357 | 37954.325  | 65.25     |
| 171 | 400.2817 | N/A | 400.2817 | 34.0931 | 35012.015  | 186.675   |
| 172 | 377.2658 | N/A | 377.2658 | 41.0307 | 50044.605  | 88.91     |
| 173 | 548.0739 | N/A | 548.0739 | 20.4519 | 40174.325  | 10.075    |
| 174 | 464.2812 | N/A | 464.2812 | 37.4672 | 30796.505  | 216.63    |
| 175 | 509.216  | N/A | 509.216  | 29.1511 | 30846.765  | 337.035   |
| 176 | 465.2958 | N/A | 465.2958 | 55.9236 | 77405.37   | 244.265   |
| 177 | 304.261  | N/A | 304.261  | 49.5927 | 56400.945  | 43.275    |
| 178 | 463.3465 | N/A | 463.3465 | 54.6266 | 90107.34   | 819.13    |
| 179 | 397.1295 | N/A | 397.1295 | 13.3291 | 23723.917  | 281.386   |
| 180 | 553.2755 | N/A | 553.2755 | 34.7182 | 34780.91   | 543.47    |
| 181 | 376.2129 | N/A | 376.2129 | 25.3508 | 31044.165  | 137.27    |
| 182 | 369.195  | N/A | 369.195  | 19.2257 | 56407.285  | 785.84    |
| 183 | 677.3253 | N/A | 677.3253 | 39.8888 | 38987.425  | 137458.02 |
| 184 | 491.3782 | N/A | 491.3782 | 54.9736 | 94772.13   | 211.22    |
| 185 | 631.2537 | N/A | 631.2537 | 38.3713 | 32057.875  | 53        |
| 186 | 408.2731 | N/A | 408.2731 | 47.2746 | 29677.735  | 309.875   |
| 187 | 353.0409 | N/A | 353.0409 | 27.1447 | 47190.225  | 15.275    |
| 188 | 423.2014 | N/A | 423.2014 | 20.9193 | 23286.68   | 224.925   |
| 189 | 353.2304 | N/A | 353.2304 | 22.5447 | 44480.495  | 124857.31 |
| 190 | 414.2986 | N/A | 414.2986 | 36.8033 | 105808.05  | 91.625    |
| 191 | 509.2157 | N/A | 509.2157 | 27.8255 | 63345.64   | 395.67    |
| 192 | 347.2195 | N/A | 347.2195 | 41.0028 | 97242.275  | 316.025   |

---

---

|     |          |     |          |         |           |           |
|-----|----------|-----|----------|---------|-----------|-----------|
| 193 | 531.8737 | N/A | 531.8737 | 10.7251 | 17396.8   | 12.348    |
| 194 | 422.2917 | N/A | 422.2917 | 52.9365 | 68251.485 | 145.59    |
| 195 | 555.293  | N/A | 555.293  | 39.0114 | 70570.265 | 281.575   |
| 196 | 363.2479 | N/A | 363.2479 | 32.2117 | 33329.135 | 109.215   |
| 197 | 573.2994 | N/A | 573.2994 | 36.8145 | 31159.545 | 2408.99   |
| 198 | 501.3535 | N/A | 501.3535 | 59.1644 | 81928.03  | 207.74    |
| 199 | 351.215  | N/A | 351.215  | 17.4856 | 68385.725 | 6544.36   |
| 200 | 317.2079 | N/A | 317.2079 | 35.8387 | 39896.05  | 202.885   |
| 201 | 571.2167 | N/A | 571.2167 | 21.518  | 17326.63  | 447.06    |
| 202 | 727.3308 | N/A | 727.3308 | 23.0546 | 48642.59  | 43.22     |
| 203 | 372.048  | N/A | 372.048  | 20.5207 | 33002.3   | 11.75     |
| 204 | 337.2019 | N/A | 337.2019 | 28.2387 | 37703.95  | 111.68    |
| 205 | 307.1153 | N/A | 307.1153 | 11.6374 | 14780.253 | 391.7355  |
| 206 | 446.3241 | N/A | 446.3241 | 45.843  | 44753.955 | 235.205   |
| 207 | 419.2824 | N/A | 419.2824 | 39.8882 | 21338.49  | 106.07    |
| 208 | 395.2405 | N/A | 395.2405 | 43.2622 | 52237.145 | 160.535   |
| 209 | 379.1182 | N/A | 379.1182 | 19.4017 | 23040.78  | 94.845    |
| 210 | 314.0755 | N/A | 314.0755 | 20.2849 | 20487.61  | 73.425    |
| 211 | 727.3323 | N/A | 727.3323 | 30.2042 | 24803.31  | 24.88     |
| 212 | 593.2773 | N/A | 593.2773 | 39.8553 | 23969.19  | 79.455    |
| 213 | 379.2449 | N/A | 379.2449 | 21.4309 | 28069.135 | 431.86    |
| 214 | 420.3067 | N/A | 420.3067 | 38.3552 | 60268.38  | 64.055    |
| 215 | 402.2647 | N/A | 402.2647 | 38.9159 | 28319.68  | 389.18    |
| 216 | 335.0941 | N/A | 335.0941 | 24.1572 | 19818.05  | 80.22     |
| 217 | 557.202  | N/A | 557.202  | 17.2522 | 19908.665 | 39.255    |
| 218 | 437.2377 | N/A | 437.2377 | 41.7358 | 23988.02  | 408.26    |
| 219 | 429.2646 | N/A | 429.2646 | 34.5771 | 36863.155 | 108.17    |
| 220 | 323.0574 | N/A | 323.0574 | 22.7441 | 18643.01  | 202.15    |
| 221 | 481.3747 | N/A | 481.3747 | 46.1101 | 23661.445 | 118.44    |
| 222 | 341.2662 | N/A | 341.2662 | 46.0998 | 35861.81  | 72.98     |
| 223 | 375.2131 | N/A | 375.2131 | 19.3139 | 40440.89  | 487.98    |
| 224 | 400.2803 | N/A | 400.2803 | 52.6157 | 73921.835 | 143.75    |
| 225 | 365.1934 | N/A | 365.1934 | 46.2288 | 21445.21  | 64.715    |
| 226 | 503.3679 | N/A | 503.3679 | 57.5297 | 45511.45  | 326.58    |
| 227 | 509.2179 | N/A | 509.2179 | 42.9795 | 31540.455 | 133.33    |
| 228 | 375.2511 | N/A | 375.2511 | 42.7885 | 49929.37  | 195.635   |
| 229 | 323.0272 | N/A | 323.0272 | 26.5867 | 34049.55  | 39.545    |
| 230 | 486.1953 | N/A | 486.1953 | 35.6589 | 20510.35  | 51.34     |
| 231 | 709.3198 | N/A | 709.3198 | 25.9869 | 28493.455 | 78.87     |
| 232 | 416.3115 | N/A | 416.3115 | 48.9082 | 33617.735 | 512.665   |
| 233 | 527.2329 | N/A | 527.2329 | 29.6174 | 23299.855 | 88.74     |
| 234 | 521.3468 | N/A | 521.3468 | 42.1093 | 61227.26  | 141.045   |
| 235 | 649.2967 | N/A | 649.2967 | 37.6415 | 23635.985 | 79035.595 |
| 236 | 308.1258 | N/A | 308.1258 | 29.2232 | 21688.395 | 62.695    |

---

---

|     |          |     |          |         |           |          |
|-----|----------|-----|----------|---------|-----------|----------|
| 237 | 659.3168 | N/A | 659.3168 | 42.8792 | 15227.43  | 248.84   |
| 238 | 537.3756 | N/A | 537.3756 | 50.7493 | 33840     | 277.04   |
| 239 | 371.1761 | N/A | 371.1761 | 9.1379  | 13186.946 | 381.921  |
| 240 | 691.3131 | N/A | 691.3131 | 34.3971 | 49778.93  | 343.54   |
| 241 | 478.3015 | N/A | 478.3015 | 37.7817 | 71119.245 | 79.9     |
| 242 | 331.0866 | N/A | 331.0866 | 20.6472 | 17117.99  | 27.35    |
| 243 | 691.3097 | N/A | 691.3097 | 29.4951 | 38635.575 | 217.08   |
| 244 | 324.1794 | N/A | 324.1794 | 16.8199 | 15651.085 | 238.24   |
| 245 | 348.1803 | N/A | 348.1803 | 18.2286 | 11449.735 | 152.99   |
| 246 | 494.2897 | N/A | 494.2897 | 43.0048 | 23259.775 | 293.11   |
| 247 | 496.3104 | N/A | 496.3104 | 36.0309 | 23653.355 | 298.66   |
| 248 | 448.2828 | N/A | 448.2828 | 54.4873 | 19042.235 | 244.575  |
| 249 | 318.239  | N/A | 318.239  | 31.3693 | 20980.375 | 51.645   |
| 250 | 667.1148 | N/A | 667.1148 | 27.057  | 29424.745 | 18.525   |
| 251 | 322.2512 | N/A | 322.2512 | 9.5352  | 12583.503 | 38.301   |
| 252 | 703.2752 | N/A | 703.2752 | 36.2858 | 20448.46  | 38.275   |
| 253 | 300.0633 | N/A | 300.0633 | 27.1338 | 42603.26  | 162.715  |
| 254 | 693.3295 | N/A | 693.3295 | 39.9181 | 30049.035 | 87       |
| 255 | 379.0847 | N/A | 379.0847 | 22.1781 | 18786.8   | 100.81   |
| 256 | 406.2927 | N/A | 406.2927 | 39.6234 | 40315.43  | 48.455   |
| 257 | 480.329  | N/A | 480.329  | 25.0111 | 9083.98   | 135.25   |
| 258 | 379.2458 | N/A | 379.2458 | 21.9085 | 27219.815 | 306.465  |
| 259 | 731.176  | N/A | 731.176  | 22.9477 | 17158.65  | 12.9     |
| 260 | 462.3216 | N/A | 462.3216 | 33.5698 | 38001.615 | 82.875   |
| 261 | 393.0596 | N/A | 393.0596 | 20.4076 | 29384.905 | 25.83    |
| 262 | 404.277  | N/A | 404.277  | 41.1004 | 37571.935 | 174.85   |
| 263 | 589.3585 | N/A | 589.3585 | 45.8695 | 26060.615 | 33.18    |
| 264 | 477.3611 | N/A | 477.3611 | 52.2828 | 38629.37  | 397.855  |
| 265 | 737.2564 | N/A | 737.2564 | 23.1883 | 13024.25  | 77.695   |
| 266 | 425.2303 | N/A | 425.2303 | 35.2447 | 24569.775 | 255.275  |
| 267 | 416.276  | N/A | 416.276  | 32.2368 | 100539.52 | 142.09   |
| 268 | 334.2352 | N/A | 334.2352 | 25.0282 | 33088.595 | 50.32    |
| 269 | 303.1194 | N/A | 303.1194 | 21.5358 | 15139.775 | 115.79   |
| 270 | 653.2625 | N/A | 653.2625 | 30.3352 | 19122.04  | 42.57    |
| 271 | 431.2925 | N/A | 431.2925 | 41.7003 | 40445.935 | 385.14   |
| 272 | 563.3288 | N/A | 563.3288 | 57.8708 | 99509.64  | 49.44    |
| 273 | 509.2146 | N/A | 509.2146 | 39.3069 | 21581.615 | 362.72   |
| 274 | 643.241  | N/A | 643.241  | 20.5263 | 16896.76  | 149.23   |
| 275 | 347.1854 | N/A | 347.1854 | 25.0131 | 26390.93  | 196.325  |
| 276 | 351.1916 | N/A | 351.1916 | 27.1702 | 16321.845 | 141.57   |
| 277 | 377.2272 | N/A | 377.2272 | 28.3109 | 33899.965 | 196.265  |
| 278 | 501.3244 | N/A | 501.3244 | 47.021  | 24360.58  | 50.82    |
| 279 | 393.2617 | N/A | 393.2617 | 28.6596 | 39944.975 | 1708.105 |
| 280 | 428.2774 | N/A | 428.2774 | 39.9784 | 32693.375 | 381.305  |

---

---

|     |          |     |          |         |           |           |
|-----|----------|-----|----------|---------|-----------|-----------|
| 281 | 460.3365 | N/A | 460.3365 | 49.2647 | 33987.445 | 1848.045  |
| 282 | 737.4616 | N/A | 737.4616 | 31.2188 | 21700.75  | 34.155    |
| 283 | 503.3677 | N/A | 503.3677 | 59.1893 | 66717.715 | 154.635   |
| 284 | 329.1049 | N/A | 329.1049 | 32.1743 | 27528.355 | 42.86     |
| 285 | 345.1015 | N/A | 345.1015 | 26.1019 | 22221.975 | 56.305    |
| 286 | 306.2777 | N/A | 306.2777 | 56.9525 | 36794.97  | 53.28     |
| 287 | 310.1656 | N/A | 310.1656 | 13.6045 | 14485.769 | 184.7715  |
| 288 | 391.2462 | N/A | 391.2462 | 30.7027 | 27857.235 | 2058.125  |
| 289 | 364.2769 | N/A | 364.2769 | 54.1222 | 29395.23  | 144.02    |
| 290 | 480.3292 | N/A | 480.3292 | 25.0401 | 11281.42  | 135.25    |
| 291 | 491.2096 | N/A | 491.2096 | 30.7406 | 17084.625 | 64.02     |
| 292 | 369.2956 | N/A | 369.2956 | 55.3655 | 43438.335 | 55.655    |
| 293 | 419.2823 | N/A | 419.2823 | 39.6603 | 4223.615  | 57.24     |
| 294 | 449.2655 | N/A | 449.2655 | 48.5664 | 38612.195 | 123.855   |
| 295 | 501.1225 | N/A | 501.1225 | 27.1286 | 11856.89  | 26.13     |
| 296 | 436.3373 | N/A | 436.3373 | 55.0768 | 33438.87  | 47.42     |
| 297 | 505.3957 | N/A | 505.3957 | 57.1361 | 54590.52  | 281.36    |
| 298 | 318.245  | N/A | 318.245  | 30.4153 | 17479.205 | 67.525    |
| 299 | 324.1796 | N/A | 324.1796 | 18.8205 | 14802.04  | 99.655    |
| 300 | 645.2558 | N/A | 645.2558 | 19.6541 | 12440.82  | 34.56     |
| 301 | 353.2294 | N/A | 353.2294 | 34.2872 | 42909.695 | 209.34    |
| 302 | 388.2448 | N/A | 388.2448 | 35.4363 | 19010.2   | 23.4      |
| 303 | 351.2165 | N/A | 351.2165 | 36.1744 | 22858.02  | 148.65    |
| 304 | 456.2764 | N/A | 456.2764 | 32.1205 | 44995.575 | 133.885   |
| 305 | 477.3635 | N/A | 477.3635 | 57.0065 | 47895.91  | 357.06    |
| 306 | 359.2206 | N/A | 359.2206 | 29.4769 | 22382.585 | 169.865   |
| 307 | 394.2236 | N/A | 394.2236 | 21.2219 | 13599.11  | 121.9     |
| 308 | 340.1207 | N/A | 340.1207 | 25.3968 | 15276.74  | 26.73     |
| 309 | 537.1801 | N/A | 537.1801 | 24.3143 | 14360.025 | 41.485    |
| 310 | 447.1505 | N/A | 447.1505 | 35.3132 | 19128.53  | 25.53     |
| 311 | 471.2285 | N/A | 471.2285 | 30.6447 | 19182.72  | 83.525    |
| 312 | 364.2808 | N/A | 364.2808 | 58.2169 | 35846.765 | 83.16     |
| 313 | 405.1894 | N/A | 405.1894 | 18.342  | 16182.89  | 18879.585 |
| 314 | 322.2024 | N/A | 322.2024 | 24.8798 | 65917.42  | 61.99     |
| 315 | 505.2258 | N/A | 505.2258 | 37.5191 | 14135.57  | 37.62     |
| 316 | 442.2922 | N/A | 442.2922 | 39.9084 | 25350.56  | 228.21    |
| 317 | 467.3189 | N/A | 467.3189 | 45.4353 | 25952.995 | 47.61     |
| 318 | 381.1321 | N/A | 381.1321 | 19.4344 | 17271.885 | 147.195   |
| 319 | 420.1999 | N/A | 420.1999 | 18.2034 | 11351.995 | 100.33    |
| 320 | 377.2118 | N/A | 377.2118 | 45.8526 | 19920.18  | 85.27     |
| 321 | 573.3033 | N/A | 573.3033 | 39.5962 | 20015.995 | 603.815   |
| 322 | 462.3193 | N/A | 462.3193 | 41.5863 | 29727.325 | 117.515   |
| 323 | 542.2346 | N/A | 542.2346 | 18.3197 | 9404.33   | 47.04     |
| 324 | 343.1946 | N/A | 343.1946 | 33.9177 | 19744.455 | 95.705    |

---

---

|     |          |     |          |         |            |           |
|-----|----------|-----|----------|---------|------------|-----------|
| 325 | 321.1708 | N/A | 321.1708 | 33.3291 | 15385.49   | 119.02    |
| 326 | 460.3042 | N/A | 460.3042 | 28.0318 | 39336.285  | 177.425   |
| 327 | 347.2183 | N/A | 347.2183 | 42.793  | 44370.175  | 367.285   |
| 328 | 346.1991 | N/A | 346.1991 | 35.335  | 36269.18   | 55.385    |
| 329 | 339.2486 | N/A | 339.2486 | 33.3546 | 28706.63   | 47.56     |
| 330 | 647.2348 | N/A | 647.2348 | 25.7741 | 22103.795  | 184.31    |
| 331 | 651.244  | N/A | 651.244  | 20.9652 | 9765.84    | 77.89     |
| 332 | 526.2098 | N/A | 526.2098 | 33.4308 | 18364.28   | 22        |
| 333 | 458.2895 | N/A | 458.2895 | 29.706  | 33114.76   | 88.81     |
| 334 | 649.2994 | N/A | 649.2994 | 33.7642 | 12342.445  | 59.92     |
| 335 | 496.3103 | N/A | 496.3103 | 36.7272 | 15951.94   | 60.135    |
| 336 | 316.227  | N/A | 316.227  | 33.7431 | 15148.145  | 108.765   |
| 337 | 479.2676 | N/A | 479.2676 | 46.1894 | 15041.95   | 73.2      |
| 338 | 737.2592 | N/A | 737.2592 | 23.4042 | 37090.38   | 75.88     |
| 339 | 627.2809 | N/A | 627.2809 | 31.8357 | 20491.5    | 42.69     |
| 340 | 381.2614 | N/A | 381.2614 | 31.6898 | 44484.06   | 476.24    |
| 341 | 306.173  | N/A | 306.173  | 36.4833 | 36882.895  | 48.245    |
| 342 | 507.3429 | N/A | 507.3429 | 59.3259 | 43799.625  | 263.31    |
| 343 | 405.1926 | N/A | 405.1926 | 16.8381 | 15106.23   | 273.01    |
| 344 | 448.3012 | N/A | 448.3012 | 32.1628 | 28348.25   | 99.455    |
| 345 | 555.2929 | N/A | 555.2929 | 48.1995 | 50194.42   | 135.14    |
| 346 | 613.2398 | N/A | 613.2398 | 31.9588 | 17710.715  | 1686.595  |
| 347 | 496.3056 | N/A | 496.3056 | 32.9683 | 13726.315  | 121.145   |
| 348 | 529.3081 | N/A | 529.3081 | 39.6947 | 23187.355  | 260.41    |
| 349 | 671.2838 | N/A | 671.2838 | 46.4176 | 19804.59   | 71.505    |
| 350 | 523.3249 | N/A | 523.3249 | 27.8856 | 55068.09   | 88.44     |
| 351 | 314.2488 | N/A | 314.2488 | 51.3423 | 25592.65   | 40.14     |
| 352 | 329.1753 | N/A | 329.1753 | 26.0804 | 45945.595  | 190.765   |
| 353 | 310.1615 | N/A | 310.1615 | 14.3779 | 8868.402   | 70.4375   |
| 354 | 509.215  | N/A | 509.215  | 31.9504 | 16668.715  | 58159     |
| 355 | 476.336  | N/A | 476.336  | 42.9496 | 19176.405  | 66.33     |
| 356 | 427.2676 | N/A | 427.2676 | 18.5129 | 24601.015  | 87.605    |
| 357 | 374.2325 | N/A | 374.2325 | 39.368  | 24815.9    | 64.66     |
| 358 | 356.3196 | N/A | 356.3196 | 52.7138 | 39170.895  | 81.33     |
| 359 | 693.3208 | N/A | 693.3208 | 28.5227 | 18719.77   | 328.16    |
| 360 | 398.2689 | N/A | 398.2689 | 32.1528 | 38879.325  | 101.295   |
| 361 | 322.253  | N/A | 322.253  | 9.9331  | 11256.7665 | 15.274    |
| 362 | 384.1812 | N/A | 384.1812 | 45.6861 | 13199.06   | 36.965    |
| 363 | 705.2866 | N/A | 705.2866 | 30.4812 | 15822.42   | 262.145   |
| 364 | 392.3101 | N/A | 392.3101 | 58.1949 | 36985.76   | 72.52     |
| 365 | 381.2595 | N/A | 381.2595 | 32.6374 | 34474.085  | 389.08    |
| 366 | 331.2229 | N/A | 331.2229 | 45.0501 | 6036.205   | 522.155   |
| 367 | 391.2455 | N/A | 391.2455 | 33.118  | 27121.06   | 153042.58 |
| 368 | 651.2453 | N/A | 651.2453 | 22.7752 | 12467.115  | 41.565    |

---



---

|     |          |     |          |         |            |            |
|-----|----------|-----|----------|---------|------------|------------|
| 369 | 381.1342 | N/A | 381.1342 | 17.4092 | 10860.7    | 84.39      |
| 370 | 428.2798 | N/A | 428.2798 | 41.0252 | 21314.145  | 71.47      |
| 371 | 448.3388 | N/A | 448.3388 | 44.2572 | 31056.265  | 254.965    |
| 372 | 335.2072 | N/A | 335.2072 | 45.8678 | 14888.395  | 693.94     |
| 373 | 345.2019 | N/A | 345.2019 | 31.5968 | 19062.055  | 153.97     |
| 374 | 449.1621 | N/A | 449.1621 | 35.357  | 13366.15   | 78.395     |
| 375 | 354.1862 | N/A | 354.1862 | 48.8309 | 29924.42   | 41.775     |
| 376 | 634.4182 | N/A | 634.4182 | 9.4494  | 8475.87    | 7.6005     |
| 377 | 448.3372 | N/A | 448.3372 | 43.1362 | 29256.575  | 399.35     |
| 378 | 627.2448 | N/A | 627.2448 | 29.07   | 14997.945  | 0          |
| 379 | 507.3305 | N/A | 507.3305 | 35.7833 | 27032.98   | 140.55     |
| 380 | 571.3665 | N/A | 571.3665 | 39.0538 | 13899.68   | 148.5      |
| 381 | 631.2503 | N/A | 631.2503 | 37.1781 | 13450.63   | 261258.135 |
| 382 | 415.141  | N/A | 415.141  | 15.6308 | 10952.053  | 64.902     |
| 383 | 333.2034 | N/A | 333.2034 | 33.2216 | 41906.495  | 292.17     |
| 384 | 527.2262 | N/A | 527.2262 | 26.1919 | 15134.545  | 13972.18   |
| 385 | 709.3264 | N/A | 709.3264 | 32.2859 | 62870.67   | 157.31     |
| 386 | 346.1632 | N/A | 346.1632 | 16.7949 | 8903.6175  | 134.175    |
| 387 | 501.2837 | N/A | 501.2837 | 37.5123 | 13796.43   | 75         |
| 388 | 451.2151 | N/A | 451.2151 | 25.6512 | 13642.47   | 123.8      |
| 389 | 365.2691 | N/A | 365.2691 | 47.2291 | 16733.455  | 118.275    |
| 390 | 429.277  | N/A | 429.277  | 49.1857 | 15011.08   | 56.595     |
| 391 | 459.3447 | N/A | 459.3447 | 56.9093 | 26427.145  | 493.555    |
| 392 | 451.3192 | N/A | 451.3192 | 47.8368 | 17897.775  | 149.8      |
| 393 | 352.2495 | N/A | 352.2495 | 15.3908 | 15219.8255 | 130.738    |
| 394 | 351.2141 | N/A | 351.2141 | 18.1769 | 11245.635  | 1977.75    |
| 395 | 395.0767 | N/A | 395.0767 | 16.5333 | 9347.49    | 16.748     |
| 396 | 792.6009 | N/A | 792.6009 | 9.8992  | 9357.2655  | 7.788      |
| 397 | 354.1338 | N/A | 354.1338 | 14.4033 | 9345.4205  | 80.514     |
| 398 | 351.2142 | N/A | 351.2142 | 22.7233 | 46626.29   | 982.53     |
| 399 | 317.1744 | N/A | 317.1744 | 32.8492 | 14654.355  | 109.23     |
| 400 | 381.2231 | N/A | 381.2231 | 23.9481 | 16253.765  | 368.04     |
| 401 | 463.3199 | N/A | 463.3199 | 51.8571 | 13579.19   | 168.165    |
| 402 | 332.1465 | N/A | 332.1465 | 14.4362 | 7566.685   | 148.743    |
| 403 | 462.3174 | N/A | 462.3174 | 35.1437 | 48659.36   | 85.8       |
| 404 | 741.3484 | N/A | 741.3484 | 27.0853 | 29525.955  | 115.61     |
| 405 | 347.2191 | N/A | 347.2191 | 33.9501 | 23388.935  | 707.535    |
| 406 | 434.3201 | N/A | 434.3201 | 42.8895 | 26656.715  | 271.915    |
| 407 | 689.2946 | N/A | 689.2946 | 26.0937 | 13929.615  | 96.36      |
| 408 | 341.2657 | N/A | 341.2657 | 44.7139 | 38501.26   | 1564       |
| 409 | 324.1799 | N/A | 324.1799 | 19.2601 | 10632.955  | 103.995    |
| 410 | 377.2323 | N/A | 377.2323 | 22.9616 | 12976.84   | 346.185    |
| 411 | 451.3277 | N/A | 451.3277 | 55.228  | 23588.26   | 130.56     |
| 412 | 462.3156 | N/A | 462.3156 | 35.3514 | 1062.655   | 85.8       |

---

---

|     |          |     |          |         |           |             |
|-----|----------|-----|----------|---------|-----------|-------------|
| 413 | 462.2623 | N/A | 462.2623 | 45.9002 | 15860.64  | 56.34       |
| 414 | 337.2331 | N/A | 337.2331 | 59.1004 | 34814.975 | 172.295     |
| 415 | 463.3201 | N/A | 463.3201 | 47.7336 | 13559.29  | 305.53      |
| 416 | 647.4812 | N/A | 647.4812 | 58.9166 | 24004.215 | 97.08       |
| 417 | 675.3132 | N/A | 675.3132 | 45.8899 | 21321.22  | 141.365     |
| 418 | 334.2354 | N/A | 334.2354 | 21.5058 | 9501.82   | 884.87      |
| 419 | 446.3231 | N/A | 446.3231 | 40.2295 | 20832.085 | 2213.7      |
| 420 | 537.3394 | N/A | 537.3394 | 36.0856 | 19088.615 | 105.575     |
| 421 | 691.3039 | N/A | 691.3039 | 31.506  | 32302.145 | 244.98      |
| 422 | 453.2985 | N/A | 453.2985 | 40.6568 | 13715.625 | 34.2        |
| 423 | 703.2768 | N/A | 703.2768 | 34.1568 | 11774.95  | 34.17       |
| 424 | 393.2567 | N/A | 393.2567 | 31.1869 | 14817.945 | 220.605     |
| 425 | 691.3071 | N/A | 691.3071 | 30.3994 | 12443.81  | 11917.925   |
| 426 | 402.2625 | N/A | 402.2625 | 32.5953 | 35721.32  | 227.665     |
| 427 | 677.326  | N/A | 677.326  | 51.5127 | 18687.615 | 609.73      |
| 428 | 689.3006 | N/A | 689.3006 | 26.6438 | 16399.85  | 102.075     |
| 429 | 693.322  | N/A | 693.322  | 35.1518 | 43020.12  | 9830.64     |
| 430 | 333.2031 | N/A | 333.2031 | 26.2608 | 38998.815 | 372.08      |
| 431 | 414.2964 | N/A | 414.2964 | 52.8043 | 27250.125 | 96.705      |
| 432 | 422.2851 | N/A | 422.2851 | 47.1729 | 13523.655 | 138.335     |
| 433 | 669.253  | N/A | 669.253  | 20.7736 | 6929.75   | 28.085      |
| 434 | 449.3071 | N/A | 449.3071 | 49.4268 | 33444.8   | 336.34      |
| 435 | 375.2169 | N/A | 375.2169 | 21.5242 | 19305.925 | 243.175     |
| 436 | 339.2812 | N/A | 339.2812 | 9.3991  | 6352.143  | 31.005      |
| 437 | 609.2688 | N/A | 609.2688 | 30.1066 | 13910.64  | 80.16       |
| 438 | 432.3067 | N/A | 432.3067 | 42.9258 | 23717.75  | 73969.515   |
| 439 | 349.2116 | N/A | 349.2116 | 47.0057 | 7019.215  | 419.865     |
| 440 | 350.2349 | N/A | 350.2349 | 25.6902 | 16769.72  | 999.65      |
| 441 | 409.2587 | N/A | 409.2587 | 29.2226 | 11595.625 | 79.9        |
| 442 | 711.3359 | N/A | 711.3359 | 25.0422 | 7889.59   | 216.655     |
| 443 | 364.2824 | N/A | 364.2824 | 46.8224 | 13890.43  | 65.145      |
| 444 | 477.3602 | N/A | 477.3602 | 58.8718 | 9874.42   | 263.37      |
| 445 | 689.2962 | N/A | 689.2962 | 30.9456 | 8800.705  | 92.025      |
| 446 | 317.2067 | N/A | 317.2067 | 59.2004 | 49460.36  | 262.75      |
| 447 | 337.2377 | N/A | 337.2377 | 26.9805 | 1478.85   | 161857.495  |
| 448 | 631.2531 | N/A | 631.2531 | 27.1092 | 11435.845 | 42586.075   |
| 449 | 351.2482 | N/A | 351.2482 | 36.3083 | 756.05    | 236961.02   |
| 450 | 432.2733 | N/A | 432.2733 | 21.5704 | 8814.47   | 94.525      |
| 451 | 677.326  | N/A | 677.326  | 43.9526 | 8601.12   | 212220.77   |
| 452 | 447.3447 | N/A | 447.3447 | 57.9266 | 15450.33  | 290.88      |
| 453 | 353.2274 | N/A | 353.2274 | 60.0061 | 28578.45  | 107.415     |
| 454 | 425.1793 | N/A | 425.1793 | 20.0379 | 29.725    | 2690165.2   |
| 455 | 527.2242 | N/A | 527.2242 | 12.6554 | 6.048     | 1969619.919 |
| 456 | 402.2966 | N/A | 402.2966 | 46.7217 | 69.715    | 2126442.695 |

---

|     |          |     |          |         |            |             |
|-----|----------|-----|----------|---------|------------|-------------|
| 457 | 631.2488 | N/A | 631.2488 | 24.057  | 43.55      | 2199739.265 |
| 458 | 527.2263 | N/A | 527.2263 | 16.2736 | 96.2845    | 1256484.352 |
| 459 | 565.2002 | N/A | 565.2002 | 26.5877 | 60.11      | 1685055.475 |
| 460 | 563.1849 | N/A | 563.1849 | 25.921  | 60.69      | 1210696.485 |
| 461 | 527.2218 | N/A | 527.2218 | 11.5583 | 18.2015    | 929760.3745 |
| 462 | 400.2821 | N/A | 400.2821 | 42.7636 | 973.205    | 1135570.945 |
| 463 | 409.0919 | N/A | 409.0919 | 17.8743 | 11.87      | 1160182.885 |
| 464 | 378.297  | N/A | 378.297  | 52.2322 | 1703.715   | 1604258.545 |
| 465 | 631.243  | N/A | 631.243  | 22.1571 | 62.715     | 744613.86   |
| 466 | 353.0674 | N/A | 353.0674 | 16.3979 | 8.141      | 739147.145  |
| 467 | 631.2502 | N/A | 631.2502 | 29.0701 | 243.33     | 771992.695  |
| 468 | 467.1914 | N/A | 467.1914 | 25.279  | 55.29      | 459611.205  |
| 469 | 583.2124 | N/A | 583.2124 | 18.7391 | 35.415     | 416833.465  |
| 470 | 693.3223 | N/A | 693.3223 | 34.5313 | 1397.09    | 978052.995  |
| 471 | 627.2701 | N/A | 627.2701 | 29.005  | 97.35      | 574047.04   |
| 472 | 650.2604 | N/A | 650.2604 | 24.7428 | 44.85      | 628675.28   |
| 473 | 545.2496 | N/A | 545.2496 | 57.2602 | 50.1       | 1122073.515 |
| 474 | 695.3333 | N/A | 695.3333 | 36.6739 | 913.095    | 845257.63   |
| 475 | 645.257  | N/A | 645.257  | 57.2679 | 77.055     | 1092944.625 |
| 476 | 301.072  | N/A | 301.072  | 18.8302 | 700.66     | 572931.28   |
| 477 | 645.2873 | N/A | 645.2873 | 28.6889 | 245.89     | 375348.02   |
| 478 | 388.2793 | N/A | 388.2793 | 41.6243 | 138.665    | 365512.185  |
| 479 | 677.328  | N/A | 677.328  | 36.3154 | 603522.175 | 1034237.105 |
| 480 | 479.2408 | N/A | 479.2408 | 59.2588 | 23.75      | 612106.16   |
| 481 | 631.2468 | N/A | 631.2468 | 22.7223 | 101.965    | 289769.66   |
| 482 | 583.209  | N/A | 583.209  | 15.8703 | 19.62      | 348276.8445 |
| 483 | 677.3226 | N/A | 677.3226 | 34.1884 | 168        | 629673.745  |
| 484 | 551.258  | N/A | 551.258  | 59.2588 | 11.41      | 546958      |
| 485 | 375.048  | N/A | 375.048  | 16.2918 | 7.21       | 353600.2135 |
| 486 | 451.2073 | N/A | 451.2073 | 56.3627 | 37.625     | 512069.855  |
| 487 | 465.2227 | N/A | 465.2227 | 56.4533 | 33.66      | 484468.825  |
| 488 | 364.2786 | N/A | 364.2786 | 45.7807 | 48.64      | 319850.695  |
| 489 | 701.4866 | N/A | 701.4866 | 5.9275  | 0          | 129010.141  |
| 490 | 347.1838 | N/A | 347.1838 | 21.3815 | 350.825    | 266459.015  |
| 491 | 395.0752 | N/A | 395.0752 | 12.3097 | 7.95       | 162379.6895 |
| 492 | 341.2651 | N/A | 341.2651 | 45.1109 | 286.6      | 225747.605  |
| 493 | 814.5678 | N/A | 814.5678 | 5.9229  | 3.762      | 101738.137  |
| 494 | 329.1761 | N/A | 329.1761 | 37.8483 | 339.235    | 335360.52   |
| 495 | 313.0724 | N/A | 313.0724 | 17.7661 | 30.425     | 193002.235  |
| 496 | 351.2497 | N/A | 351.2497 | 33.2956 | 1036.36    | 179456.985  |
| 497 | 573.243  | N/A | 573.243  | 57.2593 | 36.64      | 472082.38   |
| 498 | 503.2422 | N/A | 503.2422 | 56.5021 | 17.85      | 778350.145  |
| 499 | 422.1769 | N/A | 422.1769 | 20.1333 | 13.62      | 144857.955  |
| 500 | 451.2082 | N/A | 451.2082 | 48.2577 | 26.105     | 236652.4    |

---

|     |          |     |          |         |          |             |
|-----|----------|-----|----------|---------|----------|-------------|
| 501 | 625.2051 | N/A | 625.2051 | 33.2443 | 107.045  | 220631.895  |
| 502 | 566.2799 | N/A | 566.2799 | 59.1578 | 10.89    | 328713.005  |
| 503 | 662.3943 | N/A | 662.3943 | 47.6642 | 267.785  | 330847.785  |
| 504 | 569.2686 | N/A | 569.2686 | 25.9552 | 118.14   | 158631.64   |
| 505 | 601.2236 | N/A | 601.2236 | 19.0024 | 73.515   | 138797.75   |
| 506 | 363.25   | N/A | 363.25   | 17.9666 | 29.72    | 162112.87   |
| 507 | 650.2649 | N/A | 650.2649 | 26.9838 | 580.41   | 250085.915  |
| 508 | 627.2155 | N/A | 627.2155 | 33.8266 | 27.225   | 202268.585  |
| 509 | 565.2382 | N/A | 565.2382 | 52.6513 | 41.005   | 262353.62   |
| 510 | 533.2475 | N/A | 533.2475 | 51.1127 | 93.71    | 239481.445  |
| 511 | 609.2644 | N/A | 609.2644 | 40.9873 | 464.265  | 236711.05   |
| 512 | 507.2667 | N/A | 507.2667 | 59.1956 | 46.29    | 284991.75   |
| 513 | 477.2201 | N/A | 477.2201 | 49.6463 | 33.625   | 210171.235  |
| 514 | 465.2247 | N/A | 465.2247 | 52.7913 | 41.925   | 286437.87   |
| 515 | 453.3494 | N/A | 453.3494 | 35.4824 | 286.5    | 209702.615  |
| 516 | 591.1985 | N/A | 591.1985 | 5.9643  | 3.12     | 85006.141   |
| 517 | 460.2193 | N/A | 460.2193 | 50.997  | 27.04    | 209470.61   |
| 518 | 477.2229 | N/A | 477.2229 | 57.2492 | 13.35    | 447210.13   |
| 519 | 386.2687 | N/A | 386.2687 | 37.1021 | 937.75   | 173948.33   |
| 520 | 678.3299 | N/A | 678.3299 | 42.8462 | 13178.66 | 155619.055  |
| 521 | 525.2094 | N/A | 525.2094 | 14.2813 | 7.557    | 135257.6615 |
| 522 | 416.2765 | N/A | 416.2765 | 33.7523 | 104.12   | 168781.065  |
| 523 | 613.2258 | N/A | 613.2258 | 20.5222 | 39.48    | 105887.335  |
| 524 | 301.0727 | N/A | 301.0727 | 15.1406 | 9.786    | 140701.47   |
| 525 | 505.2187 | N/A | 505.2187 | 51.1347 | 16.74    | 184179.37   |
| 526 | 537.2443 | N/A | 537.2443 | 50.6686 | 31.485   | 195580.345  |
| 527 | 527.2231 | N/A | 527.2231 | 24.6914 | 84.865   | 200948.79   |
| 528 | 593.2701 | N/A | 593.2701 | 38.1433 | 44.73    | 118305.21   |
| 529 | 351.2506 | N/A | 351.2506 | 35.8732 | 471.155  | 135121.805  |
| 530 | 420.2275 | N/A | 420.2275 | 56.3843 | 29.48    | 328361.285  |
| 531 | 507.269  | N/A | 507.269  | 56.4545 | 15.62    | 243305.39   |
| 532 | 569.198  | N/A | 569.198  | 17.7724 | 16.445   | 143850.175  |
| 533 | 597.1923 | N/A | 597.1923 | 12.5389 | 9.8445   | 117635.1865 |
| 534 | 479.239  | N/A | 479.239  | 50.5123 | 23.895   | 190479.22   |
| 535 | 545.2376 | N/A | 545.2376 | 13.8677 | 100.304  | 80232.3595  |
| 536 | 581.1968 | N/A | 581.1968 | 22.254  | 26.24    | 112752.16   |
| 537 | 385.1917 | N/A | 385.1917 | 20.1038 | 63.895   | 104376.415  |
| 538 | 336.1771 | N/A | 336.1771 | 47.6858 | 89.355   | 235766.065  |
| 539 | 537.2438 | N/A | 537.2438 | 56.3987 | 22.445   | 226762.98   |
| 540 | 355.0799 | N/A | 355.0799 | 17.7768 | 28.305   | 100473.005  |
| 541 | 583.2121 | N/A | 583.2121 | 19.8742 | 43.82    | 105821.105  |
| 542 | 436.2989 | N/A | 436.2989 | 52.1938 | 56.56    | 156648.22   |
| 543 | 465.2225 | N/A | 465.2225 | 48.1365 | 9.69     | 146367.715  |
| 544 | 460.302  | N/A | 460.302  | 47.0313 | 109.75   | 111465.625  |

---

---

|     |          |     |          |         |          |             |
|-----|----------|-----|----------|---------|----------|-------------|
| 545 | 381.2598 | N/A | 381.2598 | 28.6696 | 189.8    | 212543.155  |
| 546 | 573.2462 | N/A | 573.2462 | 24.0645 | 20.625   | 96615.535   |
| 547 | 486.2299 | N/A | 486.2299 | 57.0767 | 6.93     | 252447.25   |
| 548 | 625.2598 | N/A | 625.2598 | 48.2302 | 21.45    | 140227.895  |
| 549 | 321.1663 | N/A | 321.1663 | 6.1351  | 6.448    | 68068.4575  |
| 550 | 609.263  | N/A | 609.263  | 49.5723 | 26.18    | 155393.515  |
| 551 | 339.2123 | N/A | 339.2123 | 22.499  | 60.345   | 206851.865  |
| 552 | 676.3119 | N/A | 676.3119 | 33.6503 | 51.51    | 276634.2    |
| 553 | 676.3101 | N/A | 676.3101 | 32.1518 | 70.315   | 196643.49   |
| 554 | 422.2447 | N/A | 422.2447 | 56.2928 | 43.925   | 449355.64   |
| 555 | 333.1614 | N/A | 333.1614 | 14.2938 | 72.115   | 116512.2805 |
| 556 | 552.2627 | N/A | 552.2627 | 56.3981 | 22.145   | 203233.775  |
| 557 | 503.1646 | N/A | 503.1646 | 25.9078 | 74.8     | 106083.03   |
| 558 | 667.3039 | N/A | 667.3039 | 30.5986 | 44.88    | 120483.935  |
| 559 | 427.1935 | N/A | 427.1935 | 20.044  | 98.95    | 107607.64   |
| 560 | 447.1598 | N/A | 447.1598 | 15.9921 | 13.306   | 102032.8975 |
| 561 | 583.2104 | N/A | 583.2104 | 23.1742 | 43.59    | 102443.765  |
| 562 | 707.2985 | N/A | 707.2985 | 35.9718 | 76.715   | 88240.025   |
| 563 | 599.2055 | N/A | 599.2055 | 11.3039 | 5.8645   | 105723.121  |
| 564 | 591.2505 | N/A | 591.2505 | 35.3459 | 57.005   | 78043.485   |
| 565 | 405.1851 | N/A | 405.1851 | 12.7215 | 18.557   | 123331.219  |
| 566 | 477.2201 | N/A | 477.2201 | 47.6936 | 11.625   | 116686.535  |
| 567 | 609.2617 | N/A | 609.2617 | 47.7855 | 12.035   | 116753.025  |
| 568 | 337.1978 | N/A | 337.1978 | 20.3796 | 115.02   | 142511.875  |
| 569 | 325.1987 | N/A | 325.1987 | 15.3924 | 28.105   | 69339.3975  |
| 570 | 405.1858 | N/A | 405.1858 | 11.5872 | 31.5375  | 84479.478   |
| 571 | 625.2552 | N/A | 625.2552 | 27.0278 | 86.34    | 132380.575  |
| 572 | 537.2405 | N/A | 537.2405 | 59.1881 | 21.025   | 151346.135  |
| 573 | 353.2645 | N/A | 353.2645 | 40.2043 | 1065.185 | 112732.76   |
| 574 | 559.1736 | N/A | 559.1736 | 6.3651  | 2.13     | 51520.9675  |
| 575 | 325.2358 | N/A | 325.2358 | 23.6167 | 48.425   | 149197.46   |
| 576 | 367.2458 | N/A | 367.2458 | 31.4418 | 2262.23  | 124779.9    |
| 577 | 588.4075 | N/A | 588.4075 | 32.8227 | 43.89    | 146139.955  |
| 578 | 631.2501 | N/A | 631.2501 | 36.4379 | 525.575  | 78312.415   |
| 579 | 323.0559 | N/A | 323.0559 | 16.9795 | 15.64    | 62127.53    |
| 580 | 706.1721 | N/A | 706.1721 | 59.6348 | 12.81    | 141459.305  |
| 581 | 713.237  | N/A | 713.237  | 26.8823 | 72.85    | 92237.73    |
| 582 | 573.2988 | N/A | 573.2988 | 36.6811 | 678.88   | 130288.795  |
| 583 | 369.1918 | N/A | 369.1918 | 17.2507 | 42.72    | 98915.75    |
| 584 | 303.1162 | N/A | 303.1162 | 17.3886 | 72.835   | 84211.795   |
| 585 | 677.3254 | N/A | 677.3254 | 47.5889 | 1665.145 | 149778.07   |
| 586 | 383.1495 | N/A | 383.1495 | 10.133  | 5.29     | 58186.8815  |
| 587 | 593.2715 | N/A | 593.2715 | 50.9382 | 24.78    | 114467.7    |
| 588 | 693.3225 | N/A | 693.3225 | 38.0335 | 704.03   | 121745.765  |

---

---

|     |          |     |          |         |           |            |
|-----|----------|-----|----------|---------|-----------|------------|
| 589 | 493.2483 | N/A | 493.2483 | 50.6058 | 59.225    | 132717.85  |
| 590 | 493.2533 | N/A | 493.2533 | 48.0424 | 35.64     | 98714.54   |
| 591 | 345.201  | N/A | 345.201  | 27.7633 | 181.495   | 131209.6   |
| 592 | 447.2151 | N/A | 447.2151 | 50.9233 | 65.75     | 107514.95  |
| 593 | 331.1883 | N/A | 331.1883 | 15.9333 | 50.6345   | 89247.7265 |
| 594 | 345.203  | N/A | 345.203  | 23.5086 | 57.86     | 90666.43   |
| 595 | 567.2525 | N/A | 567.2525 | 35.1608 | 53.72     | 59488.44   |
| 596 | 381.2589 | N/A | 381.2589 | 29.4891 | 81.435    | 153073.91  |
| 597 | 509.2151 | N/A | 509.2151 | 22.1206 | 62.62     | 74218.775  |
| 598 | 458.2428 | N/A | 458.2428 | 57.2679 | 45.21     | 177951.3   |
| 599 | 391.2419 | N/A | 391.2419 | 31.3242 | 245.635   | 133530.885 |
| 600 | 309.0038 | N/A | 309.0038 | 14.9166 | 5.8575    | 109420.638 |
| 601 | 411.1818 | N/A | 411.1818 | 23.3607 | 97.255    | 82793.445  |
| 602 | 459.2141 | N/A | 459.2141 | 57.0882 | 15.015    | 182556.76  |
| 603 | 315.0872 | N/A | 315.0872 | 23.1719 | 153.65    | 74237.915  |
| 604 | 461.1762 | N/A | 461.1762 | 18.6698 | 21.335    | 61205.755  |
| 605 | 689.2897 | N/A | 689.2897 | 34.8047 | 469.045   | 73164.42   |
| 606 | 713.2382 | N/A | 713.2382 | 23.5571 | 12        | 74118.82   |
| 607 | 411.1736 | N/A | 411.1736 | 35.2458 | 76.68     | 152026.32  |
| 608 | 451.2136 | N/A | 451.2136 | 24.0874 | 81.5      | 62152.295  |
| 609 | 472.2205 | N/A | 472.2205 | 57.0944 | 8.96      | 156462.165 |
| 610 | 659.2403 | N/A | 659.2403 | 47.1114 | 44.22     | 67078.635  |
| 611 | 411.1777 | N/A | 411.1777 | 37.903  | 67.22     | 136228.08  |
| 612 | 406.0833 | N/A | 406.0833 | 17.8951 | 9.57      | 55116.235  |
| 613 | 311.1614 | N/A | 311.1614 | 12.62   | 21.469    | 58161.71   |
| 614 | 575.2051 | N/A | 575.2051 | 6.069   | 3.996     | 50225.5305 |
| 615 | 351.1548 | N/A | 351.1548 | 35.0998 | 84.415    | 152082.595 |
| 616 | 567.1809 | N/A | 567.1809 | 13.4657 | 18.4275   | 44999.9995 |
| 617 | 316.2861 | N/A | 316.2861 | 20.0907 | 9.24      | 42779.22   |
| 618 | 709.3164 | N/A | 709.3164 | 39.4471 | 107.305   | 56021.405  |
| 619 | 485.3516 | N/A | 485.3516 | 53.5259 | 57.75     | 224728.5   |
| 620 | 509.1783 | N/A | 509.1783 | 16.0998 | 19.018    | 65649.6415 |
| 621 | 676.4103 | N/A | 676.4103 | 52.23   | 16818.925 | 170158.01  |
| 622 | 806.3886 | N/A | 806.3886 | 44.7535 | 6.8       | 52054.735  |
| 623 | 420.2277 | N/A | 420.2277 | 48.1597 | 49.42     | 89621.52   |
| 624 | 649.2946 | N/A | 649.2946 | 29.4944 | 55.04     | 66930.73   |
| 625 | 629.2323 | N/A | 629.2323 | 31.3529 | 277.625   | 67811.51   |
| 626 | 337.2316 | N/A | 337.2316 | 26.0098 | 156.09    | 77331.685  |
| 627 | 503.2381 | N/A | 503.2381 | 49.4509 | 36.2      | 84993.645  |
| 628 | 517.2518 | N/A | 517.2518 | 57.2333 | 23.47     | 156836.98  |
| 629 | 587.281  | N/A | 587.281  | 25.288  | 56.345    | 59279      |
| 630 | 552.2614 | N/A | 552.2614 | 50.6293 | 38.96     | 96359.405  |
| 631 | 776.3336 | N/A | 776.3336 | 12.6709 | 3.0375    | 33191.2125 |
| 632 | 615.2021 | N/A | 615.2021 | 15.2851 | 8.343     | 42201.8785 |

---

---

|     |          |     |          |         |            |            |
|-----|----------|-----|----------|---------|------------|------------|
| 633 | 447.2152 | N/A | 447.2152 | 57.8842 | 32.98      | 116349.785 |
| 634 | 503.2406 | N/A | 503.2406 | 52.7825 | 33.46      | 97732.335  |
| 635 | 569.2282 | N/A | 569.2282 | 17.4851 | 13.74      | 36587.76   |
| 636 | 377.2642 | N/A | 377.2642 | 39.0392 | 352.11     | 65185.03   |
| 637 | 444.306  | N/A | 444.306  | 36.8406 | 156.065    | 126521.3   |
| 638 | 379.0806 | N/A | 379.0806 | 18.2198 | 33.48      | 54623.78   |
| 639 | 418.2887 | N/A | 418.2887 | 32.2169 | 158.985    | 146339.25  |
| 640 | 313.0698 | N/A | 313.0698 | 12.3547 | 22.5145    | 43665.47   |
| 641 | 444.3075 | N/A | 444.3075 | 42.491  | 410441.665 | 67865.51   |
| 642 | 571.2828 | N/A | 571.2828 | 34.4575 | 992.52     | 86264.265  |
| 643 | 527.2257 | N/A | 527.2257 | 27.0078 | 344.42     | 96551.215  |
| 644 | 509.214  | N/A | 509.214  | 24.0579 | 26.22      | 160873.225 |
| 645 | 550.2473 | N/A | 550.2473 | 49.4224 | 19.785     | 79797.555  |
| 646 | 551.1879 | N/A | 551.1879 | 23.9609 | 40.02      | 50548.665  |
| 647 | 489.2226 | N/A | 489.2226 | 49.5723 | 25.84      | 77214.29   |
| 648 | 309.2065 | N/A | 309.2065 | 17.8497 | 70.26      | 51979.295  |
| 649 | 927.6486 | N/A | 927.6486 | 6.093   | 2.532      | 19753.258  |
| 650 | 549.3104 | N/A | 549.3104 | 47.6577 | 160.56     | 111502.26  |
| 651 | 351.1552 | N/A | 351.1552 | 37.7953 | 112.455    | 156437.42  |
| 652 | 493.1796 | N/A | 493.1796 | 24.62   | 41.925     | 57294.28   |
| 653 | 379.2424 | N/A | 379.2424 | 26.7263 | 597.925    | 194755.83  |
| 654 | 301.1034 | N/A | 301.1034 | 11.6856 | 67.515     | 55880.947  |
| 655 | 458.287  | N/A | 458.287  | 43.4393 | 201.18     | 47214.41   |
| 656 | 405.1503 | N/A | 405.1503 | 9.2306  | 8.659      | 36560.267  |
| 657 | 338.0413 | N/A | 338.0413 | 16.3032 | 11.675     | 61041.77   |
| 658 | 397.1237 | N/A | 397.1237 | 10.0373 | 14.534     | 80175.891  |
| 659 | 645.2285 | N/A | 645.2285 | 26.4453 | 30.3       | 52080.28   |
| 660 | 646.2502 | N/A | 646.2502 | 24.8759 | 48.28      | 56472.825  |
| 661 | 381.1337 | N/A | 381.1337 | 13.1482 | 15.3715    | 44534.859  |
| 662 | 499.2076 | N/A | 499.2076 | 57.2679 | 32.085     | 148048.42  |
| 663 | 389.1906 | N/A | 389.1906 | 34.8869 | 409.085    | 63109.66   |
| 664 | 523.2289 | N/A | 523.2289 | 48.0902 | 19.72      | 69749.69   |
| 665 | 619.1965 | N/A | 619.1965 | 5.9254  | 2.19       | 26586.5825 |
| 666 | 441.1529 | N/A | 441.1529 | 11.736  | 8.619      | 23612.2685 |
| 667 | 645.227  | N/A | 645.227  | 30.3273 | 36.52      | 48607.745  |
| 668 | 381.1314 | N/A | 381.1314 | 25.907  | 121.98     | 54904.105  |
| 669 | 613.2231 | N/A | 613.2231 | 15.7665 | 32.864     | 71054.875  |
| 670 | 551.1903 | N/A | 551.1903 | 21.4778 | 40.31      | 53569.66   |
| 671 | 335.1854 | N/A | 335.1854 | 21.1453 | 59.8       | 35881.635  |
| 672 | 353.2296 | N/A | 353.2296 | 31.3585 | 323.88     | 67141.855  |
| 673 | 331.1799 | N/A | 331.1799 | 19.5207 | 143.565    | 57272.205  |
| 674 | 503.2384 | N/A | 503.2384 | 48.0748 | 18.87      | 121686.59  |
| 675 | 623.2797 | N/A | 623.2797 | 57.1968 | 7.8        | 126278.1   |
| 676 | 329.1747 | N/A | 329.1747 | 41.8979 | 220.7      | 49190.065  |

---

---

|     |          |     |          |         |         |            |
|-----|----------|-----|----------|---------|---------|------------|
| 677 | 444.2274 | N/A | 444.2274 | 57.2    | 13.65   | 117867.98  |
| 678 | 583.2116 | N/A | 583.2116 | 21.2228 | 70.64   | 59979.55   |
| 679 | 403.1716 | N/A | 403.1716 | 10.3654 | 5.978   | 43923.8365 |
| 680 | 446.2833 | N/A | 446.2833 | 47.138  | 262.38  | 45038.94   |
| 681 | 358.1991 | N/A | 358.1991 | 19.2319 | 49.145  | 50432.715  |
| 682 | 713.2367 | N/A | 713.2367 | 24.332  | 30.36   | 41478.055  |
| 683 | 311.2146 | N/A | 311.2146 | 15.8452 | 40.548  | 51563.3135 |
| 684 | 367.1772 | N/A | 367.1772 | 15.9202 | 28.0555 | 95564.422  |
| 685 | 307.0597 | N/A | 307.0597 | 22.5887 | 34.21   | 40968.525  |
| 686 | 675.3121 | N/A | 675.3121 | 31.1714 | 1417.38 | 43843.6    |
| 687 | 405.1889 | N/A | 405.1889 | 16.4486 | 63.9255 | 49238.722  |
| 688 | 349.1993 | N/A | 349.1993 | 30.3467 | 377.44  | 40217.015  |
| 689 | 693.3222 | N/A | 693.3222 | 33.2303 | 329.105 | 70810.525  |
| 690 | 521.2478 | N/A | 521.2478 | 52.6917 | 37.4    | 92327.005  |
| 691 | 437.1965 | N/A | 437.1965 | 26.1296 | 143.285 | 49888.59   |
| 692 | 507.1955 | N/A | 507.1955 | 28.2111 | 231.195 | 40477.35   |
| 693 | 464.3326 | N/A | 464.3326 | 34.0842 | 136.84  | 61703.96   |
| 694 | 691.3055 | N/A | 691.3055 | 23.2827 | 58.58   | 49551.61   |
| 695 | 541.2007 | N/A | 541.2007 | 10.254  | 9.3015  | 32282.393  |
| 696 | 314.0785 | N/A | 314.0785 | 16.2876 | 7.95    | 30672.01   |
| 697 | 351.1867 | N/A | 351.1867 | 23.6332 | 94.05   | 51634.94   |
| 698 | 577.203  | N/A | 577.203  | 28.4446 | 57.72   | 27029.36   |
| 699 | 485.1773 | N/A | 485.1773 | 19.0725 | 33      | 38960.795  |
| 700 | 478.293  | N/A | 478.293  | 40.3806 | 143.515 | 53196.9    |
| 701 | 329.1674 | N/A | 329.1674 | 12.6571 | 25.8475 | 36386.253  |
| 702 | 491.2378 | N/A | 491.2378 | 59.3093 | 21.45   | 95384.915  |
| 703 | 407.1681 | N/A | 407.1681 | 25.4902 | 177.455 | 37818.165  |
| 704 | 538.2515 | N/A | 538.2515 | 48.0822 | 31.605  | 55330.035  |
| 705 | 478.2899 | N/A | 478.2899 | 35.8896 | 109.485 | 99736.195  |
| 706 | 727.0995 | N/A | 727.0995 | 16.2241 | 3.744   | 44686.8355 |
| 707 | 369.1923 | N/A | 369.1923 | 18.4114 | 183.55  | 70908.53   |
| 708 | 643.216  | N/A | 643.216  | 32.6709 | 224.62  | 39567.52   |
| 709 | 461.1916 | N/A | 461.1916 | 49.407  | 26.53   | 53878.865  |
| 710 | 446.3248 | N/A | 446.3248 | 40.0805 | 427.405 | 100884.09  |
| 711 | 525.2083 | N/A | 525.2083 | 17.4717 | 13.045  | 37977.535  |
| 712 | 561.243  | N/A | 561.243  | 59.2159 | 6.82    | 70311.555  |
| 713 | 639.2747 | N/A | 639.2747 | 56.3294 | 15.3    | 73945.525  |
| 714 | 531.2349 | N/A | 531.2349 | 49.6449 | 41.4    | 58085.26   |
| 715 | 462.3191 | N/A | 462.3191 | 30.5654 | 369.29  | 47979.54   |
| 716 | 551.1889 | N/A | 551.1889 | 16.1969 | 7.5     | 36001.235  |
| 717 | 525.2066 | N/A | 525.2066 | 15.4996 | 9.742   | 35528.6805 |
| 718 | 583.2129 | N/A | 583.2129 | 24.4537 | 68.51   | 43222.67   |
| 719 | 464.3286 | N/A | 464.3286 | 32.8511 | 121.495 | 39865.19   |
| 720 | 591.2546 | N/A | 591.2546 | 24.0858 | 41.54   | 31867.725  |

---



---

|     |          |     |          |         |           |            |
|-----|----------|-----|----------|---------|-----------|------------|
| 721 | 361.2358 | N/A | 361.2358 | 20.9212 | 219.08    | 66369.49   |
| 722 | 613.2212 | N/A | 613.2212 | 20.9948 | 19.905    | 53154.285  |
| 723 | 353.2003 | N/A | 353.2003 | 27.0148 | 453.64    | 34446.59   |
| 724 | 555.2922 | N/A | 555.2922 | 36.3503 | 25967.625 | 83539.825  |
| 725 | 643.2139 | N/A | 643.2139 | 29.4511 | 86.175    | 40424.52   |
| 726 | 695.3335 | N/A | 695.3335 | 40.4936 | 94.675    | 36090.845  |
| 727 | 501.3506 | N/A | 501.3506 | 57.6866 | 1066.96   | 113354.92  |
| 728 | 525.2078 | N/A | 525.2078 | 21.3536 | 117.295   | 49389.53   |
| 729 | 480.3067 | N/A | 480.3067 | 39.0926 | 332.055   | 76003.81   |
| 730 | 521.2456 | N/A | 521.2456 | 49.4261 | 15.835    | 54221.285  |
| 731 | 477.1692 | N/A | 477.1692 | 6.3403  | 3.7975    | 17532.5145 |
| 732 | 609.264  | N/A | 609.264  | 31.0562 | 228.535   | 44062.425  |
| 733 | 569.1968 | N/A | 569.1968 | 12.1297 | 3.959     | 38723.4565 |
| 734 | 471.1981 | N/A | 471.1981 | 23.755  | 59.845    | 44300.93   |
| 735 | 416.2769 | N/A | 416.2769 | 29.1711 | 103.41    | 114845.795 |
| 736 | 509.212  | N/A | 509.212  | 15.4085 | 13.963    | 24869.3155 |
| 737 | 709.3187 | N/A | 709.3187 | 22.1573 | 412.61    | 96375.935  |
| 738 | 351.1838 | N/A | 351.1838 | 23.1811 | 46.605    | 32541.92   |
| 739 | 675.2747 | N/A | 675.2747 | 26.9043 | 186.74    | 31709.835  |
| 740 | 553.2027 | N/A | 553.2027 | 18.3164 | 35.845    | 35756.61   |
| 741 | 583.2069 | N/A | 583.2069 | 22.3678 | 50.19     | 46171.5    |
| 742 | 489.2185 | N/A | 489.2185 | 47.7189 | 32.16     | 56981.93   |
| 743 | 521.2468 | N/A | 521.2468 | 48.1008 | 14.8      | 86582.03   |
| 744 | 421.237  | N/A | 421.237  | 49.4269 | 45.99     | 63484.505  |
| 745 | 459.1593 | N/A | 459.1593 | 29.0327 | 45.65     | 53363.79   |
| 746 | 455.2617 | N/A | 455.2617 | 27.6729 | 54.165    | 70819.945  |
| 747 | 806.5089 | N/A | 806.5089 | 31.322  | 45.67     | 30544.085  |
| 748 | 547.1897 | N/A | 547.1897 | 26.5318 | 26.455    | 53188.475  |
| 749 | 349.1993 | N/A | 349.1993 | 19.4184 | 207.48    | 87304.005  |
| 750 | 550.2469 | N/A | 550.2469 | 47.7898 | 20.475    | 49711.715  |
| 751 | 389.1944 | N/A | 389.1944 | 37.9898 | 61.15     | 55858.015  |
| 752 | 663.2401 | N/A | 663.2401 | 26.8163 | 158.87    | 49382.105  |
| 753 | 387.181  | N/A | 387.181  | 26.1842 | 204.335   | 33288.57   |
| 754 | 483.1906 | N/A | 483.1906 | 19.9264 | 10.35     | 55185.21   |
| 755 | 363.249  | N/A | 363.249  | 29.24   | 171.6     | 41309.03   |
| 756 | 333.2004 | N/A | 333.2004 | 19.204  | 82.99     | 110361.595 |
| 757 | 495.3609 | N/A | 495.3609 | 44.5511 | 89.235    | 31921.13   |
| 758 | 391.2464 | N/A | 391.2464 | 32.2697 | 173.95    | 48973.08   |
| 759 | 597.2268 | N/A | 597.2268 | 27.3426 | 44.89     | 29353.555  |
| 760 | 775.3089 | N/A | 775.3089 | 29.7757 | 36.07     | 33362.455  |
| 761 | 311.0835 | N/A | 311.0835 | 10.5704 | 16.968    | 27521.967  |
| 762 | 515.2395 | N/A | 515.2395 | 49.6104 | 22.425    | 46324.285  |
| 763 | 337.2323 | N/A | 337.2323 | 24.2634 | 56.79     | 44444.905  |
| 764 | 645.226  | N/A | 645.226  | 32.5853 | 308.135   | 35253.375  |

---

---

|     |          |     |          |         |         |            |
|-----|----------|-----|----------|---------|---------|------------|
| 765 | 737.4484 | N/A | 737.4484 | 28.1906 | 45.075  | 36412.31   |
| 766 | 564.2633 | N/A | 564.2633 | 57.2042 | 20.295  | 104922.375 |
| 767 | 611.2774 | N/A | 611.2774 | 26.6581 | 70.855  | 24303.88   |
| 768 | 533.2457 | N/A | 533.2457 | 59.2438 | 11.88   | 61666.19   |
| 769 | 449.1788 | N/A | 449.1788 | 6.3833  | 3.135   | 14668.9865 |
| 770 | 462.3208 | N/A | 462.3208 | 29.7873 | 254.09  | 36510.365  |
| 771 | 430.2928 | N/A | 430.2928 | 37.4851 | 9997.02 | 94288.285  |
| 772 | 559.2249 | N/A | 559.2249 | 49.406  | 7.79    | 44315.195  |
| 773 | 334.3087 | N/A | 334.3087 | 45.8323 | 54.14   | 92422.08   |
| 774 | 363.2478 | N/A | 363.2478 | 15.0205 | 26.8065 | 28234.457  |
| 775 | 367.2104 | N/A | 367.2104 | 12.6061 | 156.456 | 36180.895  |
| 776 | 579.2169 | N/A | 579.2169 | 29.3275 | 43.32   | 27169.895  |
| 777 | 305.2061 | N/A | 305.2061 | 19.0331 | 30.815  | 38812.1    |
| 778 | 581.1951 | N/A | 581.1951 | 16.8562 | 41.415  | 22974.039  |
| 779 | 577.2719 | N/A | 577.2719 | 35.1768 | 128.475 | 59629.565  |
| 780 | 585.2624 | N/A | 585.2624 | 22.1107 | 43.73   | 32101.305  |
| 781 | 591.2032 | N/A | 591.2032 | 4.829   | 2.691   | 55708.385  |
| 782 | 359.2171 | N/A | 359.2171 | 27.0271 | 167.475 | 30511.97   |
| 783 | 480.245  | N/A | 480.245  | 49.1935 | 27.39   | 47718.44   |
| 784 | 327.1852 | N/A | 327.1852 | 15.8909 | 82.296  | 39303.1305 |
| 785 | 695.2239 | N/A | 695.2239 | 29.0517 | 36.025  | 29673.385  |
| 786 | 519.2662 | N/A | 519.2662 | 52.3612 | 48.37   | 64198.5    |
| 787 | 566.2813 | N/A | 566.2813 | 57.9231 | 8.8     | 57525.39   |
| 788 | 524.2149 | N/A | 524.2149 | 12.6737 | 5.5125  | 26582.0975 |
| 789 | 339.2449 | N/A | 339.2449 | 30.3892 | 267.57  | 34564.305  |
| 790 | 523.2279 | N/A | 523.2279 | 50.5883 | 13.325  | 52086.545  |
| 791 | 351.2477 | N/A | 351.2477 | 28.4603 | 84.18   | 27420.275  |
| 792 | 363.0232 | N/A | 363.0232 | 5.0063  | 4.633   | 102706.523 |
| 793 | 496.3024 | N/A | 496.3024 | 29.6737 | 87.775  | 31550.03   |
| 794 | 351.1525 | N/A | 351.1525 | 11.9662 | 53.918  | 53062.317  |
| 795 | 383.1485 | N/A | 383.1485 | 26.5661 | 108.36  | 49254.25   |
| 796 | 521.2483 | N/A | 521.2483 | 56.8955 | 21.105  | 108313.78  |
| 797 | 524.2201 | N/A | 524.2201 | 24.8632 | 29.61   | 36533.815  |
| 798 | 332.2201 | N/A | 332.2201 | 29.6551 | 172.89  | 32470.265  |
| 799 | 431.1815 | N/A | 431.1815 | 51.0972 | 26.615  | 47557.87   |
| 800 | 505.1836 | N/A | 505.1836 | 26.6368 | 193.065 | 44622.045  |
| 801 | 675.3129 | N/A | 675.3129 | 42.5293 | 294.925 | 28465.72   |
| 802 | 419.1128 | N/A | 419.1128 | 22.5372 | 32.11   | 32394.065  |
| 803 | 441.2419 | N/A | 441.2419 | 19.8481 | 31.055  | 37235.715  |
| 804 | 351.211  | N/A | 351.211  | 12.6688 | 11.4805 | 82481.5525 |
| 805 | 533.2136 | N/A | 533.2136 | 23.4386 | 23.735  | 33750.025  |
| 806 | 675.3128 | N/A | 675.3128 | 35.9006 | 1743.94 | 38646.785  |
| 807 | 492.2099 | N/A | 492.2099 | 56.3667 | 19.2    | 30030.595  |
| 808 | 479.1866 | N/A | 479.1866 | 19.2085 | 29.625  | 25006.825  |

---

---

|     |          |     |          |         |         |            |
|-----|----------|-----|----------|---------|---------|------------|
| 809 | 565.2367 | N/A | 565.2367 | 53.5771 | 17.11   | 49864.815  |
| 810 | 655.3424 | N/A | 655.3424 | 42.7816 | 596.595 | 35612.3    |
| 811 | 675.3095 | N/A | 675.3095 | 45.57   | 259.58  | 55991.84   |
| 812 | 706.1672 | N/A | 706.1672 | 58.4522 | 6.27    | 52302.02   |
| 813 | 404.3113 | N/A | 404.3113 | 52.9709 | 1522.34 | 69862.38   |
| 814 | 561.2413 | N/A | 561.2413 | 56.4156 | 10      | 55584.29   |
| 815 | 523.2298 | N/A | 523.2298 | 56.2503 | 20.15   | 61035.335  |
| 816 | 496.3024 | N/A | 496.3024 | 30.314  | 476.725 | 31562.31   |
| 817 | 416.2778 | N/A | 416.2778 | 35.375  | 380.425 | 62671.345  |
| 818 | 323.2161 | N/A | 323.2161 | 26.0778 | 99.57   | 49137.83   |
| 819 | 641.2859 | N/A | 641.2859 | 31.4135 | 95.7    | 32300.555  |
| 820 | 413.1565 | N/A | 413.1565 | 18.4546 | 48.425  | 26083.155  |
| 821 | 543.2226 | N/A | 543.2226 | 26.5292 | 44.48   | 41296.53   |
| 822 | 403.1356 | N/A | 403.1356 | 7.9516  | 5.175   | 20267.4015 |
| 823 | 625.3142 | N/A | 625.3142 | 32.2643 | 50.82   | 25946.84   |
| 824 | 498.3154 | N/A | 498.3154 | 33.3999 | 115.685 | 37722.805  |
| 825 | 392.3106 | N/A | 392.3106 | 54.6579 | 721.32  | 79690.415  |
| 826 | 434.3502 | N/A | 434.3502 | 58.0198 | 29.8    | 107434.66  |
| 827 | 435.2493 | N/A | 435.2493 | 57.8401 | 23.8    | 93836.63   |
| 828 | 422.2845 | N/A | 422.2845 | 52.4507 | 319.08  | 43266.29   |
| 829 | 707.2954 | N/A | 707.2954 | 36.6831 | 24.905  | 28776.93   |
| 830 | 675.2667 | N/A | 675.2667 | 59.1642 | 7.665   | 48603.03   |
| 831 | 461.177  | N/A | 461.177  | 15.8845 | 30.56   | 24854.247  |
| 832 | 387.1759 | N/A | 387.1759 | 11.6252 | 15.719  | 34089.6395 |
| 833 | 433.2354 | N/A | 433.2354 | 51.0678 | 55.62   | 48746.805  |
| 834 | 627.2716 | N/A | 627.2716 | 28.4387 | 55.275  | 21889.95   |
| 835 | 323.0217 | N/A | 323.0217 | 22.566  | 34.05   | 42653.41   |
| 836 | 513.2192 | N/A | 513.2192 | 57.2694 | 7.84    | 75298.71   |
| 837 | 599.2058 | N/A | 599.2058 | 18.7735 | 28.635  | 63418.28   |
| 838 | 331.0814 | N/A | 331.0814 | 16.341  | 8.444   | 16847.307  |
| 839 | 357.1976 | N/A | 357.1976 | 23.1842 | 76.225  | 67999.97   |
| 840 | 593.2336 | N/A | 593.2336 | 32.2907 | 52.26   | 19192.96   |
| 841 | 423.2004 | N/A | 423.2004 | 13.8689 | 29.138  | 12001.476  |
| 842 | 444.2662 | N/A | 444.2662 | 43.474  | 43.885  | 26870.52   |
| 843 | 657.2488 | N/A | 657.2488 | 15.041  | 9.291   | 20153.418  |
| 844 | 351.1572 | N/A | 351.1572 | 41.9412 | 108.3   | 29782.27   |
| 845 | 411.1768 | N/A | 411.1768 | 41.9024 | 31.525  | 27066.355  |
| 846 | 461.1955 | N/A | 461.1955 | 56.7671 | 33.425  | 11877.235  |
| 847 | 631.2418 | N/A | 631.2418 | 49.4393 | 16.755  | 41787.865  |
| 848 | 391.2082 | N/A | 391.2082 | 28.3953 | 245.8   | 24155.95   |
| 849 | 659.21   | N/A | 659.21   | 19.1427 | 28.075  | 23714.1    |
| 850 | 498.3166 | N/A | 498.3166 | 32.4613 | 110.92  | 27698.045  |
| 851 | 485.3547 | N/A | 485.3547 | 50.3195 | 35.56   | 87740.24   |
| 852 | 581.1999 | N/A | 581.1999 | 14.9183 | 6.656   | 27277.8405 |

---

---

|     |          |     |          |         |         |            |
|-----|----------|-----|----------|---------|---------|------------|
| 853 | 475.2053 | N/A | 475.2053 | 59.0838 | 13.23   | 36479.22   |
| 854 | 477.1711 | N/A | 477.1711 | 28.6452 | 63.415  | 28300.6    |
| 855 | 379.2455 | N/A | 379.2455 | 29.7288 | 485.38  | 68677.705  |
| 856 | 465.2241 | N/A | 465.2241 | 49.2101 | 47.14   | 43543.18   |
| 857 | 709.4168 | N/A | 709.4168 | 23.2972 | 25.52   | 20908.795  |
| 858 | 461.1936 | N/A | 461.1936 | 47.5743 | 56.785  | 26702.05   |
| 859 | 687.2755 | N/A | 687.2755 | 32.6923 | 63.57   | 28930.585  |
| 860 | 547.1912 | N/A | 547.1912 | 27.2088 | 48.75   | 22144.76   |
| 861 | 579.2497 | N/A | 579.2497 | 56.4312 | 9.68    | 44688.385  |
| 862 | 579.2896 | N/A | 579.2896 | 38.4488 | 138.765 | 83001.635  |
| 863 | 475.2388 | N/A | 475.2388 | 56.2939 | 61.39   | 39334.795  |
| 864 | 430.2106 | N/A | 430.2106 | 57.2308 | 24.18   | 65623.11   |
| 865 | 412.2822 | N/A | 412.2822 | 46.942  | 142.605 | 31962.955  |
| 866 | 649.2896 | N/A | 649.2896 | 28.0792 | 118.235 | 23013.275  |
| 867 | 553.2742 | N/A | 553.2742 | 41.1463 | 60.855  | 27362.925  |
| 868 | 711.3341 | N/A | 711.3341 | 25.4574 | 276.205 | 24130.77   |
| 869 | 537.2422 | N/A | 537.2422 | 49.1802 | 34.32   | 33534.36   |
| 870 | 463.3463 | N/A | 463.3463 | 54.1297 | 453.245 | 91897.84   |
| 871 | 365.1975 | N/A | 365.1975 | 14.7681 | 38.464  | 25927.0405 |
| 872 | 659.2956 | N/A | 659.2956 | 31.6788 | 103.51  | 27514.2    |
| 873 | 349.2297 | N/A | 349.2297 | 25.7464 | 128.075 | 60243.765  |
| 874 | 553.2753 | N/A | 553.2753 | 33.7705 | 89.475  | 44788.325  |
| 875 | 329.1755 | N/A | 329.1755 | 32.0459 | 835.98  | 46385.14   |
| 876 | 460.2218 | N/A | 460.2218 | 49.4652 | 44.56   | 35397.18   |
| 877 | 385.2909 | N/A | 385.2909 | 44.7866 | 160.225 | 34380.3    |
| 878 | 401.1534 | N/A | 401.1534 | 18.7097 | 23.79   | 41008.345  |
| 879 | 597.3016 | N/A | 597.3016 | 41.641  | 57.71   | 21373.34   |
| 880 | 336.1776 | N/A | 336.1776 | 52.2244 | 6552.73 | 71680.55   |
| 881 | 653.3254 | N/A | 653.3254 | 41.1343 | 90.795  | 29157.4    |
| 882 | 567.2509 | N/A | 567.2509 | 47.808  | 21.485  | 33924.085  |
| 883 | 347.1816 | N/A | 347.1816 | 15.3825 | 17.9875 | 35951.8675 |
| 884 | 369.1947 | N/A | 369.1947 | 19.5986 | 930.65  | 41977.97   |
| 885 | 509.2114 | N/A | 509.2114 | 16.2994 | 28.2905 | 30783.561  |
| 886 | 402.2617 | N/A | 402.2617 | 36.9363 | 2461.32 | 27745.86   |
| 887 | 637.2943 | N/A | 637.2943 | 52.3453 | 7.98    | 42365.995  |
| 888 | 545.2018 | N/A | 545.2018 | 24.3448 | 70.65   | 17628.32   |
| 889 | 349.2    | N/A | 349.2    | 25.8027 | 395.75  | 26917.685  |
| 890 | 565.2396 | N/A | 565.2396 | 48.0517 | 18.63   | 25548.38   |
| 891 | 493.2505 | N/A | 493.2505 | 49.3376 | 50.745  | 39205.595  |
| 892 | 331.1867 | N/A | 331.1867 | 18.2793 | 300.03  | 75019.175  |
| 893 | 375.2133 | N/A | 375.2133 | 19.5918 | 883.21  | 57388.695  |
| 894 | 341.1627 | N/A | 341.1627 | 15.4176 | 13.335  | 23745.5615 |
| 895 | 537.2437 | N/A | 537.2437 | 52.6521 | 41.625  | 36377.92   |
| 896 | 427.2489 | N/A | 427.2489 | 31.5218 | 164.835 | 24378.545  |

---

---

|     |          |     |          |         |          |            |
|-----|----------|-----|----------|---------|----------|------------|
| 897 | 337.1988 | N/A | 337.1988 | 21.011  | 28.21    | 25621.235  |
| 898 | 311.1598 | N/A | 311.1598 | 11.5156 | 42.725   | 21016.813  |
| 899 | 402.2607 | N/A | 402.2607 | 34.8874 | 255.75   | 29728.895  |
| 900 | 451.2127 | N/A | 451.2127 | 31.9808 | 219.61   | 28769.14   |
| 901 | 628.2445 | N/A | 628.2445 | 24.1228 | 19.89    | 25403.73   |
| 902 | 423.1073 | N/A | 423.1073 | 21.2498 | 31.36    | 20267.075  |
| 903 | 395.1463 | N/A | 395.1463 | 16.549  | 49.9185  | 12695.3315 |
| 904 | 631.2493 | N/A | 631.2493 | 23.6427 | 48.65    | 29063.165  |
| 905 | 559.2278 | N/A | 559.2278 | 47.7672 | 23.06    | 46092.985  |
| 906 | 697.3711 | N/A | 697.3711 | 35.3257 | 87.12    | 26557.225  |
| 907 | 527.2247 | N/A | 527.2247 | 23.8832 | 193.965  | 22543.715  |
| 908 | 492.2413 | N/A | 492.2413 | 56.1151 | 21.78    | 22374.64   |
| 909 | 465.225  | N/A | 465.225  | 50.6653 | 20.28    | 42179.765  |
| 910 | 691.3033 | N/A | 691.3033 | 19.6974 | 13.26    | 22912.59   |
| 911 | 447.2837 | N/A | 447.2837 | 41.0628 | 379.875  | 27209.78   |
| 912 | 521.1766 | N/A | 521.1766 | 19.6509 | 118.925  | 14745.975  |
| 913 | 595.281  | N/A | 595.281  | 36.8745 | 2192.37  | 18416.4    |
| 914 | 525.2034 | N/A | 525.2034 | 19.0874 | 22.53    | 30097.98   |
| 915 | 631.3901 | N/A | 631.3901 | 52.7858 | 32.635   | 11210.905  |
| 916 | 449.2317 | N/A | 449.2317 | 56.9428 | 17.7     | 43331.96   |
| 917 | 377.1939 | N/A | 377.1939 | 19.9388 | 46.6     | 22875.56   |
| 918 | 555.2911 | N/A | 555.2911 | 34.1365 | 79.95    | 35891.1    |
| 919 | 624.2674 | N/A | 624.2674 | 29.1511 | 30.26    | 17260.11   |
| 920 | 316.2231 | N/A | 316.2231 | 31.6429 | 119.165  | 23349.12   |
| 921 | 555.2908 | N/A | 555.2908 | 47.5798 | 161.91   | 52784.78   |
| 922 | 345.0345 | N/A | 345.0345 | 16.9843 | 11.89    | 13793.365  |
| 923 | 509.2154 | N/A | 509.2154 | 22.7155 | 96.245   | 26223.455  |
| 924 | 541.2005 | N/A | 541.2005 | 19.0686 | 72.035   | 18613.71   |
| 925 | 515.2592 | N/A | 515.2592 | 27.5568 | 131.64   | 12678.555  |
| 926 | 647.2444 | N/A | 647.2444 | 19.7542 | 205.145  | 19828.46   |
| 927 | 355.141  | N/A | 355.141  | 14.3143 | 55.496   | 25383.692  |
| 928 | 408.271  | N/A | 408.271  | 46.0774 | 215.78   | 23700.07   |
| 929 | 397.2514 | N/A | 397.2514 | 34.8666 | 119.755  | 29447.475  |
| 930 | 565.2706 | N/A | 565.2706 | 49.3592 | 11.55    | 29552.79   |
| 931 | 432.3075 | N/A | 432.3075 | 41.7033 | 1278.165 | 40377.785  |
| 932 | 509.2153 | N/A | 509.2153 | 37.1668 | 405.045  | 29141.41   |
| 933 | 501.2803 | N/A | 501.2803 | 35.1564 | 231.735  | 23271.2    |
| 934 | 381.2216 | N/A | 381.2216 | 12.899  | 20.5405  | 48169.9465 |
| 935 | 553.276  | N/A | 553.276  | 32.1896 | 177.265  | 20522.925  |
| 936 | 449.2586 | N/A | 449.2586 | 47.6547 | 84.7     | 15894.795  |
| 937 | 649.4012 | N/A | 649.4012 | 42.1287 | 280.14   | 23200.435  |
| 938 | 333.1307 | N/A | 333.1307 | 12.813  | 25.403   | 18073.5935 |
| 939 | 353.2245 | N/A | 353.2245 | 14.7409 | 17.7005  | 37652.177  |
| 940 | 479.2431 | N/A | 479.2431 | 52.9529 | 168.96   | 34614.31   |

---

---

|     |          |     |          |         |         |            |
|-----|----------|-----|----------|---------|---------|------------|
| 941 | 533.2457 | N/A | 533.2457 | 53.3352 | 50.555  | 36079.055  |
| 942 | 425.1584 | N/A | 425.1584 | 19.1174 | 379.805 | 19215.025  |
| 943 | 509.2134 | N/A | 509.2134 | 23.7172 | 66.08   | 30077.72   |
| 944 | 449.3263 | N/A | 449.3263 | 48.4022 | 232.72  | 33639.175  |
| 945 | 365.1354 | N/A | 365.1354 | 38.0633 | 190.64  | 21320.345  |
| 946 | 411.037  | N/A | 411.037  | 12.3547 | 5.4145  | 18291.5425 |
| 947 | 308.0852 | N/A | 308.0852 | 24.179  | 58.075  | 13733.19   |
| 948 | 436.3032 | N/A | 436.3032 | 24.814  | 81.02   | 19934.06   |
| 949 | 595.211  | N/A | 595.211  | 21.6717 | 19.885  | 15696.75   |
| 950 | 413.1732 | N/A | 413.1732 | 20.0574 | 57.1    | 17872.51   |
| 951 | 531.2346 | N/A | 531.2346 | 47.6865 | 17.4    | 27028.475  |
| 952 | 411.1782 | N/A | 411.1782 | 22.5287 | 69.385  | 30416.395  |
| 953 | 693.3211 | N/A | 693.3211 | 42.304  | 91.735  | 21835.275  |
| 954 | 655.3415 | N/A | 655.3415 | 33.0446 | 109.115 | 28785.545  |
| 955 | 549.2394 | N/A | 549.2394 | 51.2611 | 42.41   | 31082.92   |
| 956 | 502.2292 | N/A | 502.2292 | 59.2196 | 13.32   | 38435.83   |
| 957 | 387.1395 | N/A | 387.1395 | 16.0177 | 24.383  | 22986.6605 |
| 958 | 415.1341 | N/A | 415.1341 | 6.7943  | 3.825   | 13637.642  |
| 959 | 461.2198 | N/A | 461.2198 | 56.6679 | 19.545  | 3687.26    |
| 960 | 449.3227 | N/A | 449.3227 | 51.433  | 204.065 | 31032.715  |
| 961 | 309.0701 | N/A | 309.0701 | 7.3778  | 5.964   | 17309.1195 |
| 962 | 513.1722 | N/A | 513.1722 | 12.8281 | 4.992   | 16191.356  |
| 963 | 349.1404 | N/A | 349.1404 | 11.0028 | 14.1605 | 15955.0245 |
| 964 | 447.2843 | N/A | 447.2843 | 39.2358 | 251.05  | 20595.87   |
| 965 | 353.1675 | N/A | 353.1675 | 19.4853 | 84      | 28733.68   |
| 966 | 509.2114 | N/A | 509.2114 | 11.536  | 8.69    | 19805.7125 |
| 967 | 345.204  | N/A | 345.204  | 28.4746 | 138.93  | 23535.395  |
| 968 | 645.2298 | N/A | 645.2298 | 27.9253 | 208.965 | 19601.385  |
| 969 | 565.2032 | N/A | 565.2032 | 18.8893 | 98.83   | 18478.04   |
| 970 | 555.2899 | N/A | 555.2899 | 35.5652 | 127.08  | 24890.115  |
| 971 | 639.2716 | N/A | 639.2716 | 52.617  | 21.255  | 28644.155  |
| 972 | 681.213  | N/A | 681.213  | 25.0104 | 55.62   | 18205.255  |
| 973 | 631.2414 | N/A | 631.2414 | 47.7945 | 14.535  | 21712.605  |
| 974 | 397.2353 | N/A | 397.2353 | 30.4654 | 80.1    | 16486.125  |
| 975 | 588.4055 | N/A | 588.4055 | 5.8559  | 3.762   | 11706.1385 |
| 976 | 571.2857 | N/A | 571.2857 | 25.0132 | 141.165 | 18822.415  |
| 977 | 487.2626 | N/A | 487.2626 | 27.3206 | 113.255 | 21472.765  |
| 978 | 631.3895 | N/A | 631.3895 | 52.5403 | 64.945  | 7196.145   |
| 979 | 419.1674 | N/A | 419.1674 | 12.3577 | 25.851  | 18286.2635 |
| 980 | 555.2917 | N/A | 555.2917 | 42.896  | 444.94  | 28616.965  |
| 981 | 331.0833 | N/A | 331.0833 | 14.62   | 22.929  | 14605.2475 |
| 982 | 336.2188 | N/A | 336.2188 | 23.1811 | 228.67  | 39209.415  |
| 983 | 701.4862 | N/A | 701.4862 | 4.6666  | 3.4155  | 26901.448  |
| 984 | 495.3569 | N/A | 495.3569 | 42.9254 | 160.55  | 18755.31   |

---

---

|      |          |     |          |         |         |            |
|------|----------|-----|----------|---------|---------|------------|
| 985  | 523.1886 | N/A | 523.1886 | 18.8104 | 31.595  | 29015.535  |
| 986  | 519.2343 | N/A | 519.2343 | 50.9596 | 29.9    | 43789.905  |
| 987  | 509.176  | N/A | 509.176  | 23.9976 | 137.85  | 4938.815   |
| 988  | 677.3249 | N/A | 677.3249 | 51.7102 | 278.085 | 35016.785  |
| 989  | 553.2724 | N/A | 553.2724 | 39.5739 | 61.335  | 28656.8    |
| 990  | 353.1713 | N/A | 353.1713 | 37.9204 | 86.64   | 29837.64   |
| 991  | 555.2106 | N/A | 555.2106 | 22.3938 | 29.14   | 16280.375  |
| 992  | 419.1673 | N/A | 419.1673 | 19.1622 | 30.36   | 13088.17   |
| 993  | 423.2437 | N/A | 423.2437 | 57.0914 | 64.96   | 88801.145  |
| 994  | 432.3073 | N/A | 432.3073 | 41.0999 | 898.075 | 15237.98   |
| 995  | 356.3082 | N/A | 356.3082 | 52.0169 | 40.62   | 37109.59   |
| 996  | 432.2703 | N/A | 432.2703 | 42.3291 | 103.68  | 17037.925  |
| 997  | 407.2172 | N/A | 407.2172 | 49.4698 | 75.075  | 27600.845  |
| 998  | 361.1974 | N/A | 361.1974 | 22.3803 | 94.6    | 35320.035  |
| 999  | 433.2006 | N/A | 433.2006 | 24.0993 | 126.98  | 16407.65   |
| 1000 | 577.2736 | N/A | 577.2736 | 35.8375 | 45.56   | 20337.32   |
| 1001 | 473.3312 | N/A | 473.3312 | 46.1888 | 117.3   | 19510.82   |
| 1002 | 369.2551 | N/A | 369.2551 | 20.6128 | 18      | 16717.58   |
| 1003 | 605.2693 | N/A | 605.2693 | 57.0698 | 23.45   | 40782.215  |
| 1004 | 539.2935 | N/A | 539.2935 | 32.8216 | 85.07   | 16490.39   |
| 1005 | 411.1768 | N/A | 411.1768 | 36.8155 | 34.32   | 15196.99   |
| 1006 | 465.3468 | N/A | 465.3468 | 44.9722 | 33.37   | 51099.305  |
| 1007 | 581.1959 | N/A | 581.1959 | 15.6072 | 7.739   | 14801.721  |
| 1008 | 443.162  | N/A | 443.162  | 8.6826  | 4.237   | 12865.3765 |
| 1009 | 381.2198 | N/A | 381.2198 | 11.5426 | 12.4295 | 20503.2545 |
| 1010 | 316.2806 | N/A | 316.2806 | 19.6133 | 17.92   | 11629.815  |
| 1011 | 351.2485 | N/A | 351.2485 | 29.229  | 125.265 | 20619.915  |
| 1012 | 461.228  | N/A | 461.228  | 53.4562 | 28.14   | 28523.675  |
| 1013 | 462.2924 | N/A | 462.2924 | 47.9202 | 125.49  | 14301.63   |
| 1014 | 524.2165 | N/A | 524.2165 | 16.3225 | 10.173  | 13280.18   |
| 1015 | 539.1835 | N/A | 539.1835 | 11.1227 | 9.4105  | 10144.7335 |
| 1016 | 607.2432 | N/A | 607.2432 | 38.2223 | 81.245  | 20721.185  |
| 1017 | 711.2175 | N/A | 711.2175 | 26.9844 | 43.47   | 16512.095  |
| 1018 | 401.1567 | N/A | 401.1567 | 26.0117 | 117.935 | 18033.805  |
| 1019 | 335.189  | N/A | 335.189  | 17.3827 | 108.25  | 15303.695  |
| 1020 | 427.2237 | N/A | 427.2237 | 15.5569 | 27.7285 | 17016.232  |
| 1021 | 551.2555 | N/A | 551.2555 | 57.9573 | 9.555   | 29739.31   |
| 1022 | 661.2217 | N/A | 661.2217 | 24.1129 | 54.855  | 19777.295  |
| 1023 | 433.2362 | N/A | 433.2362 | 56.2983 | 37.87   | 79237.82   |
| 1024 | 365.0619 | N/A | 365.0619 | 12.6774 | 6.825   | 14723.0945 |
| 1025 | 615.1972 | N/A | 615.1972 | 8.6449  | 2.06    | 11769.957  |
| 1026 | 645.2801 | N/A | 645.2801 | 23.1028 | 81.26   | 11620.82   |
| 1027 | 524.2204 | N/A | 524.2204 | 11.4612 | 6.2935  | 12266.1595 |
| 1028 | 409.3124 | N/A | 409.3124 | 17.8511 | 13.02   | 5945.885   |

---

---

|      |          |     |          |         |          |            |
|------|----------|-----|----------|---------|----------|------------|
| 1029 | 509.2152 | N/A | 509.2152 | 26.3324 | 1179.98  | 19559.13   |
| 1030 | 425.1565 | N/A | 425.1565 | 38.2674 | 71.74    | 15504.725  |
| 1031 | 448.2973 | N/A | 448.2973 | 24.1366 | 67.29    | 17226.17   |
| 1032 | 631.251  | N/A | 631.251  | 28.3513 | 8240.91  | 13380.405  |
| 1033 | 795.1834 | N/A | 795.1834 | 17.7498 | 4.29     | 13526.215  |
| 1034 | 351.1801 | N/A | 351.1801 | 14.8679 | 19.3265  | 8198.6     |
| 1035 | 407.168  | N/A | 407.168  | 20.0437 | 53.775   | 19248.15   |
| 1036 | 500.212  | N/A | 500.212  | 49.4509 | 12.48    | 22822.915  |
| 1037 | 353.2601 | N/A | 353.2601 | 38.1615 | 668.46   | 20865.955  |
| 1038 | 647.3857 | N/A | 647.3857 | 39.374  | 70.72    | 33182.085  |
| 1039 | 441.2417 | N/A | 441.2417 | 22.4066 | 54.225   | 33366.83   |
| 1040 | 447.2494 | N/A | 447.2494 | 59.2168 | 33.845   | 16860.065  |
| 1041 | 609.267  | N/A | 609.267  | 39.3181 | 227.34   | 18426.735  |
| 1042 | 303.1168 | N/A | 303.1168 | 15.9912 | 31.5805  | 15952.9475 |
| 1043 | 569.2751 | N/A | 569.2751 | 42.007  | 83.84    | 14519.19   |
| 1044 | 493.2534 | N/A | 493.2534 | 57.8726 | 53.35    | 27547.07   |
| 1045 | 543.1976 | N/A | 543.1976 | 16.3024 | 27.348   | 14960.5375 |
| 1046 | 367.2449 | N/A | 367.2449 | 29.1058 | 1156.025 | 42081.52   |
| 1047 | 675.3078 | N/A | 675.3078 | 48.4133 | 274.46   | 19159.63   |
| 1048 | 403.1718 | N/A | 403.1718 | 20.4743 | 391.22   | 14983.6    |
| 1049 | 397.1247 | N/A | 397.1247 | 12.0022 | 9.734    | 10973.3815 |
| 1050 | 541.2025 | N/A | 541.2025 | 25.7464 | 76.3     | 18286.6    |
| 1051 | 597.1927 | N/A | 597.1927 | 11.9323 | 3.885    | 18142.3595 |
| 1052 | 384.1774 | N/A | 384.1774 | 44.8477 | 19.78    | 14951.495  |
| 1053 | 329.1756 | N/A | 329.1756 | 22.5987 | 103.45   | 53478.855  |
| 1054 | 661.254  | N/A | 661.254  | 56.3458 | 13.86    | 24797.945  |
| 1055 | 509.2155 | N/A | 509.2155 | 48.1118 | 40.22    | 19713.265  |
| 1056 | 397.0983 | N/A | 397.0983 | 13.1242 | 14.3875  | 12787.94   |
| 1057 | 932.874  | N/A | 932.874  | 24.1271 | 7.56     | 12445.33   |
| 1058 | 407.2211 | N/A | 407.2211 | 48.132  | 58.995   | 35618.735  |
| 1059 | 450.3158 | N/A | 450.3158 | 31.7736 | 90.725   | 21869.5    |
| 1060 | 430.2897 | N/A | 430.2897 | 35.6188 | 672.275  | 27526.795  |
| 1061 | 547.2288 | N/A | 547.2288 | 50.6217 | 31.75    | 25474.09   |
| 1062 | 423.2325 | N/A | 423.2325 | 24.0331 | 435.15   | 17729.685  |
| 1063 | 693.322  | N/A | 693.322  | 32.7634 | 416.835  | 26934.735  |
| 1064 | 477.1724 | N/A | 477.1724 | 15.6357 | 18.6585  | 17457.7635 |
| 1065 | 661.2271 | N/A | 661.2271 | 18.0438 | 20.035   | 11870.325  |
| 1066 | 573.2994 | N/A | 573.2994 | 37.385  | 250.68   | 14033.19   |
| 1067 | 693.3201 | N/A | 693.3201 | 29.1782 | 148.155  | 34357.27   |
| 1068 | 493.3263 | N/A | 493.3263 | 50.6292 | 374.455  | 17314.635  |
| 1069 | 409.2567 | N/A | 409.2567 | 23.6548 | 1995.42  | 39286.335  |
| 1070 | 471.2717 | N/A | 471.2717 | 34.5701 | 604.23   | 17423.115  |
| 1071 | 587.2802 | N/A | 587.2802 | 29.6979 | 74.64    | 16885.845  |
| 1072 | 631.2308 | N/A | 631.2308 | 20.1014 | 29.285   | 4728.04    |

---



---

|      |          |     |          |         |          |            |
|------|----------|-----|----------|---------|----------|------------|
| 1073 | 577.2755 | N/A | 577.2755 | 52.3862 | 51.9     | 28089.645  |
| 1074 | 647.2397 | N/A | 647.2397 | 17.9098 | 39.97    | 7803.5     |
| 1075 | 367.1824 | N/A | 367.1824 | 16.7557 | 115.09   | 22406.877  |
| 1076 | 585.2653 | N/A | 585.2653 | 28.6745 | 213.565  | 17520.385  |
| 1077 | 329.1756 | N/A | 329.1756 | 11.5882 | 14.0415  | 11859.495  |
| 1078 | 425.2852 | N/A | 425.2852 | 41.9357 | 213.045  | 15108.96   |
| 1079 | 477.2247 | N/A | 477.2247 | 51.1349 | 63.36    | 35819.185  |
| 1080 | 387.2077 | N/A | 387.2077 | 18.1348 | 136.81   | 34337.025  |
| 1081 | 691.3047 | N/A | 691.3047 | 22.3185 | 23       | 75694.775  |
| 1082 | 547.1904 | N/A | 547.1904 | 24.2862 | 11.845   | 16572.43   |
| 1083 | 567.2547 | N/A | 567.2547 | 23.8832 | 212.31   | 12143.455  |
| 1084 | 338.1974 | N/A | 338.1974 | 17.043  | 77.87    | 9905.54    |
| 1085 | 613.2224 | N/A | 613.2224 | 16.6136 | 11.99    | 10847.808  |
| 1086 | 693.3194 | N/A | 693.3194 | 22.5173 | 44.48    | 15498.13   |
| 1087 | 361.1862 | N/A | 361.1862 | 24.111  | 126.66   | 19073.835  |
| 1088 | 689.2027 | N/A | 689.2027 | 31.9577 | 32.34    | 16551.91   |
| 1089 | 447.25   | N/A | 447.25   | 59.2614 | 33.845   | 8376.11    |
| 1090 | 527.2208 | N/A | 527.2208 | 14.8439 | 15.8935  | 11616.791  |
| 1091 | 693.3222 | N/A | 693.3222 | 30.3748 | 375.095  | 44952.08   |
| 1092 | 425.0602 | N/A | 425.0602 | 17.6544 | 8.7      | 22006.56   |
| 1093 | 529.2068 | N/A | 529.2068 | 30.6653 | 81.16    | 5975.93    |
| 1094 | 402.26   | N/A | 402.26   | 30.4975 | 64.365   | 37255.565  |
| 1095 | 691.308  | N/A | 691.308  | 25.9204 | 1461.145 | 33917.325  |
| 1096 | 595.282  | N/A | 595.282  | 22.7085 | 42.06    | 15116.08   |
| 1097 | 613.2386 | N/A | 613.2386 | 37.3899 | 160.61   | 10508.405  |
| 1098 | 325.163  | N/A | 325.163  | 10.9411 | 57.5035  | 12072.125  |
| 1099 | 501.3497 | N/A | 501.3497 | 53.3506 | 131.045  | 27549.72   |
| 1100 | 693.3196 | N/A | 693.3196 | 41.9552 | 197.49   | 13193.505  |
| 1101 | 879.2731 | N/A | 879.2731 | 16.2195 | 3.12     | 11792.7875 |
| 1102 | 543.2204 | N/A | 543.2204 | 13.923  | 29.8425  | 10922.474  |
| 1103 | 420.2277 | N/A | 420.2277 | 52.6729 | 108.3    | 22862.13   |
| 1104 | 355.081  | N/A | 355.081  | 12.1583 | 7.625    | 10246.882  |
| 1105 | 461.227  | N/A | 461.227  | 56.4627 | 25.425   | 30796.08   |
| 1106 | 403.1698 | N/A | 403.1698 | 14.1797 | 27.2045  | 15662.63   |
| 1107 | 479.2382 | N/A | 479.2382 | 48.2616 | 57.145   | 19052.665  |
| 1108 | 501.313  | N/A | 501.313  | 32.489  | 64.96    | 16482.975  |
| 1109 | 591.2175 | N/A | 591.2175 | 31.4607 | 36.96    | 8544.595   |
| 1110 | 709.3153 | N/A | 709.3153 | 28.5023 | 185.475  | 15838.49   |
| 1111 | 349.166  | N/A | 349.166  | 14.2742 | 61.919   | 10254.4115 |
| 1112 | 409.257  | N/A | 409.257  | 22.8787 | 2670.72  | 49570.64   |
| 1113 | 579.2923 | N/A | 579.2923 | 57.9975 | 27.225   | 24220.85   |
| 1114 | 323.1303 | N/A | 323.1303 | 29.1209 | 132.95   | 20214.345  |
| 1115 | 481.3459 | N/A | 481.3459 | 37.812  | 133.555  | 14180.24   |
| 1116 | 449.2589 | N/A | 449.2589 | 56.7073 | 47.195   | 621.16     |

---

---

|      |          |     |          |         |         |            |
|------|----------|-----|----------|---------|---------|------------|
| 1117 | 493.255  | N/A | 493.255  | 52.7574 | 52      | 23596.56   |
| 1118 | 463.1982 | N/A | 463.1982 | 12.7095 | 6.72    | 13748.6535 |
| 1119 | 448.3032 | N/A | 448.3032 | 28.4357 | 682.085 | 14572.505  |
| 1120 | 677.3267 | N/A | 677.3267 | 38.239  | 29438.8 | 14745.745  |
| 1121 | 545.1924 | N/A | 545.1924 | 5.9745  | 3.332   | 11166.524  |
| 1122 | 693.3145 | N/A | 693.3145 | 25.0802 | 87.99   | 18846.765  |
| 1123 | 400.2814 | N/A | 400.2814 | 46.4228 | 147.835 | 21094.58   |
| 1124 | 707.2985 | N/A | 707.2985 | 24.5959 | 70.78   | 15536.74   |
| 1125 | 448.2949 | N/A | 448.2949 | 25.0293 | 87.42   | 20462.225  |
| 1126 | 412.2773 | N/A | 412.2773 | 31.455  | 125.56  | 25441.6    |
| 1127 | 503.1646 | N/A | 503.1646 | 33.0979 | 86.23   | 16817.775  |
| 1128 | 301.0973 | N/A | 301.0973 | 10.6642 | 6.88    | 8521.8955  |
| 1129 | 422.2823 | N/A | 422.2823 | 46.163  | 40.93   | 15149.505  |
| 1130 | 545.2279 | N/A | 545.2279 | 12.7195 | 6.71    | 7690.2415  |
| 1131 | 369.1013 | N/A | 369.1013 | 10.2016 | 19.458  | 8757.1075  |
| 1132 | 475.2432 | N/A | 475.2432 | 48.2694 | 29.495  | 4839.675   |
| 1133 | 814.5689 | N/A | 814.5689 | 4.7056  | 0       | 16041.393  |
| 1134 | 525.2078 | N/A | 525.2078 | 20.5824 | 44.625  | 8931.745   |
| 1135 | 389.2272 | N/A | 389.2272 | 20.8296 | 37.305  | 31510.025  |
| 1136 | 322.2473 | N/A | 322.2473 | 5.8971  | 3.6815  | 9204.192   |
| 1137 | 487.2382 | N/A | 487.2382 | 51.0282 | 106.505 | 18834.76   |
| 1138 | 444.2242 | N/A | 444.2242 | 49.4569 | 18.61   | 15414.255  |
| 1139 | 593.2626 | N/A | 593.2626 | 32.9584 | 202.135 | 11730.565  |
| 1140 | 420.2249 | N/A | 420.2249 | 58.0077 | 36.18   | 25461.695  |
| 1141 | 609.2645 | N/A | 609.2645 | 24.1207 | 70.78   | 9894.135   |
| 1142 | 364.28   | N/A | 364.28   | 53.5092 | 142.57  | 22081.925  |
| 1143 | 463.3439 | N/A | 463.3439 | 50.3243 | 138.075 | 21022.415  |
| 1144 | 695.3374 | N/A | 695.3374 | 39.6385 | 253.355 | 11470.42   |
| 1145 | 391.2122 | N/A | 391.2122 | 25.2712 | 84.96   | 13097.365  |
| 1146 | 628.2416 | N/A | 628.2416 | 22.1802 | 30.8    | 9079.135   |
| 1147 | 623.2756 | N/A | 623.2756 | 45.4909 | 8.36    | 9657.605   |
| 1148 | 409.2548 | N/A | 409.2548 | 18.7821 | 59.645  | 15805.405  |
| 1149 | 459.1637 | N/A | 459.1637 | 16.7249 | 14.908  | 8374.62    |
| 1150 | 676.4087 | N/A | 676.4087 | 50.7489 | 106.37  | 23567.735  |
| 1151 | 707.3017 | N/A | 707.3017 | 29.5873 | 305.045 | 9790.485   |
| 1152 | 555.2892 | N/A | 555.2892 | 43.9771 | 179.985 | 16545.09   |
| 1153 | 571.2105 | N/A | 571.2105 | 9.491   | 3.3825  | 6237.4405  |
| 1154 | 311.1579 | N/A | 311.1579 | 19.4642 | 112.87  | 21794.65   |
| 1155 | 776.33   | N/A | 776.33   | 11.4347 | 3.808   | 4458.4395  |
| 1156 | 386.2613 | N/A | 386.2613 | 45.6963 | 167.12  | 8727.6     |
| 1157 | 615.1991 | N/A | 615.1991 | 11.455  | 13.9425 | 6986.4195  |
| 1158 | 387.1778 | N/A | 387.1778 | 13.3887 | 56.4585 | 6884.1065  |

---
